# Supplementary material for: Selective switching of multiple azobenzenes
Source: PubMed Central journal article supplement — Chem Sci. 2019 Jun 21;10(31):7418–25. doi: 10.1039/c9sc02347j (PMC6713861; doi:10.1039/c9sc02347j), 2019-06-21
Supplement: SC-010-C9SC02347J-s001.pdf [file SC-010-C9SC02347J-s001.pdf]

# Selective Switching of Multiple Azobenzenes

*Andreas H. Heindl,<sup>1</sup> Jonathan Becker,<sup>2</sup> Hermann A. Wegner\*<sup>1</sup>*

Address: <sup>1</sup>Institute of Organic Chemistry, Justus Liebig University,  
Heinrich-Buff-Ring 17, 35392 Giessen (Germany) and

Center for Materials Research (LaMa), Justus Liebig University,  
Heinrich-Buff-Ring 16, 35392 Giessen (Germany)

<sup>2</sup>Institute of Inorganic and Analytical Chemistry, Justus Liebig University,  
Heinrich-Buff-Ring 17, 35392 Giessen (Germany)

Email: Hermann A. Wegner – [hermann.a.wegner@org.chemie.uni-giessen.de](mailto:hermann.a.wegner@org.chemie.uni-giessen.de)

\* Corresponding author

## Supporting Information

|                                                                       |     |
|-----------------------------------------------------------------------|-----|
| General Information .....                                             | 1   |
| Synthesis.....                                                        | 3   |
| <sup>1</sup> H- and <sup>13</sup> C{ <sup>1</sup> H}-NMR Spectra..... | 12  |
| NMR Isomerization Experiments.....                                    | 23  |
| UV-Vis Spectroscopy.....                                              | 26  |
| HPLC Isomerization Experiments .....                                  | 28  |
| Computational Data.....                                               | 30  |
| X-Ray Crystallography .....                                           | 94  |
| References .....                                                      | 133 |

## General Information

### Synthesis and Characterization

Chemicals were used as purchased from Sigma-Aldrich, Acros Organics, Alfa Aesar and TCI Europe. Anhydrous solvents were purchased from Acros Organics. Technical grade solvents used during workup and purification were distilled prior to use. Air and/or water-sensitive reactions were carried out under Schlenk-conditions. Solids were dried under high vacuum (oil pump, ca  $10^{-3}$  mbar) at room temperature (rt), 50 °C or 60 °C when necessary. Flash column chromatography and column chromatography was carried out with Silica 60 M (0.04 – 0.063 mm) or Silica 60 (0.063 – 0.2 mm) from Macherey Nagel GmbH & Co. KG. Medium-pressure liquid chromatography (MPLC) was carried out on a Büchi Sepacore<sup>®</sup> flash chromatography system X-50 with Sepacore<sup>®</sup> Flash cartridges (particle size: 40–63  $\mu\text{m}$ ). Thin layer chromatography was performed on Polygram<sup>®</sup> SIL G/UV<sub>254</sub> from Macherey Nagel GmbH & Co. KG. NMR spectra were measured on a Bruker Avance II 200 MHz, Avance II 400 MHz, Avance III 400 MHz HD or Avance III 600 MHz spectrometer at rt, if not stated otherwise. Chemical shifts are reported in parts per million (ppm) relative to the solvent peak, coupling constants ( $J$ ) are reported in Hertz (Hz). Deuterated solvents were obtained from Deutero GmbH (Kastellaun, Germany) or Euriso-Top GmbH. For all azobenzenes, the thermodynamically more stable *E*-isomer is reported if not noted otherwise. ESI-MS spectra were recorded on a Bruker Daltonics Micro TOF. APCI mass spectra were obtained by using the same system with a Bruker APCI II ion source. Melting points were measured on a Krüss KSP1N capillary melting point apparatus with a heating rate of 1 °C min<sup>-1</sup>.

## Irradiation Experiments

Irradiation of the NMR or UV/Vis samples was conducted in an in house-built box using high power LEDs by Lumitronix or Nichia, purchased from leds.de. After the given irradiation times, the samples were immediately placed and measured in the corresponding spectrometer.

**Table S1:** LEDs used for all irradiation experiments with their specifications.

| $\lambda_{\text{max}}$ / nm | $\Delta\lambda_{\text{FWHM}}$ / nm | Product name   | Luminous flux / mW |
|-----------------------------|------------------------------------|----------------|--------------------|
| 365                         | 9                                  | NCSU276AT-U365 | 780                |
| 385                         | 10                                 | NCSU276AT-U385 | 900                |
| 405                         | 12                                 | NCSU276AT-U405 | 950                |
| 425-430                     | 14                                 | LHUV-0425-0650 | 675                |
| 448                         | 20                                 | LXML-PR01-0500 | 520                |
| 470                         | 20                                 | LXML-PB01-0030 | 44                 |
| 500                         | 30                                 | NCSE119AT      | 143                |

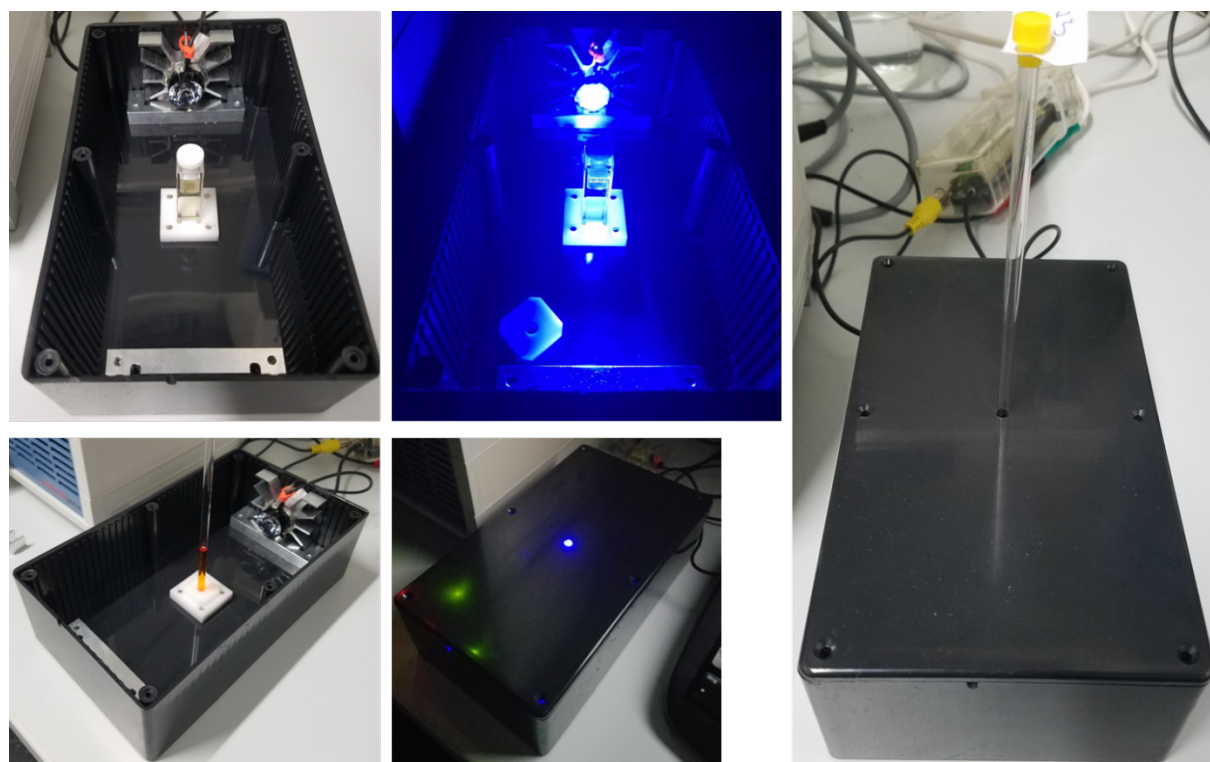

**Figure S1:** In-house built LED irradiation box for UV/Vis cuvettes as well as NMR tubes.

## Synthesis

### 2,2-(4-Aminophenyl)propane (4)<sup>[1]</sup>

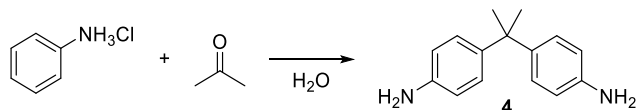

In a pressure tube, aniline hydrochloride (100 g, 764 mmol, 3.95 eq.) was suspended in water (80 mL) and acetone (14.2 mL, 193 mmol, 1.00 eq.). The tube was sealed and heated to 160 °C for 19.5 h. After cooling to rt, the solution was basified with aq. NaOH (25%) and EtOAc was added (130 mL). The organic phase was separated, washed with water (150 mL) and brine (150 mL) and was concentrated under reduced pressure. The resulting brown solution was distilled in vacuum to remove unreacted aniline and volatile byproducts to obtain a brown oil, which crystallized upon cooling to rt. The crude product was recrystallized from toluene to yield a beige solid (24.3 g, 56%).

**<sup>1</sup>H NMR** (400 MHz, CDCl<sub>3</sub>)  $\delta$  = 7.04 (d,  $J$ =8.6, 4H), 6.60 (d,  $J$ =8.6, 4H), 3.55 (s, 4H), 1.61 (s, 6H).

**<sup>13</sup>C NMR** (101 MHz, CDCl<sub>3</sub>)  $\delta$  = 143.9, 141.6, 127.7, 114.9, 41.5, 31.1.

**HRMS** (ESI):  $m/z$  for C<sub>15</sub>H<sub>18</sub>N<sub>2</sub>Na<sup>+</sup>; calcd. 249.1362, found 249.1365

**M.p.** 132 °C.

### 2-(4-Aminophenyl)-2-(4'-N-Boc-aminophenyl)propane (6)

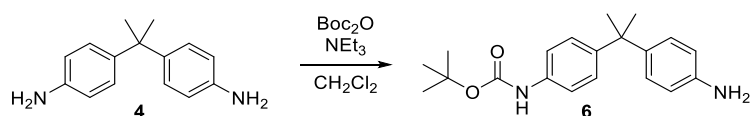

To an ice-cooled solution of 2,2-bis(4-aminophenyl)propane (5.01 g, 22.1 mmol, 1.00 eq.) and NEt<sub>3</sub> (3.2 mL, 23 mmol, 1.0 eq.) in CH<sub>2</sub>Cl<sub>2</sub> (50 mL), di-*tert*-butyl dicarbonate (4.84 g, 22.2 mmol, 1.00 eq.) was added. The solution was stirred at 0 °C for 30 min and at rt overnight. After evaporation of the solvent under reduced pressure, the crude product was purified by column chromatography (SiO<sub>2</sub>, cyclohexane/EtOAc; 3:2) to yield a colorless solid (3.31 g, 46%).

**<sup>1</sup>H NMR** (400 MHz, CDCl<sub>3</sub>) δ = 7.23 (d, *J*=8.4, 2H), 7.15 (d, *J*=8.6, 2H), 7.01 (d, *J*=8.6, 1H), 6.61 (d, *J*=8.6, 2H), 6.45 (s, 1H), 3.67 (s, 2H), 1.61 (s, 6H), 1.51 (s, 9H).

**<sup>13</sup>C NMR** (101 MHz, CDCl<sub>3</sub>) δ = 152.9, 146.0, 143.6, 141.2, 135.7, 127.6, 127.3, 118.3, 115.0, 80.3, 41.8, 30.9, 28.4.

**HRMS** (ESI): *m/z* for C<sub>20</sub>H<sub>26</sub>N<sub>2</sub>O<sub>2</sub>Na<sup>+</sup>; calcd. 349.1886, found 349.1900.

**M.p.** 49.9 °C.

### 2-(4-Aminophenyl)-2-(4'-*N*-acetylamidophenyl)propane (8)

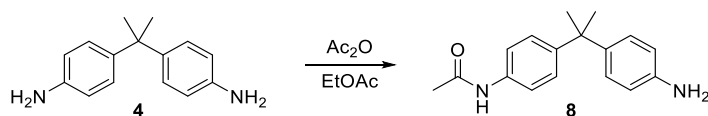

To an ice-cooled solution of 2,2-bis-(4-aminophenyl)propane (5.01 g, 22.1 mmol, 1.00 eq.) in EtOAc (125 mL), acetic anhydride (2.28 g, 22.1 mmol, 1.00 eq.) in EtOAc (ca. 5 mL) was added. After stirring for 15 min, the ice-bath was removed and the solution was allowed to warm to rt within 2 h. After filtration of the precipitate, the filtrate was concentrated under reduced pressure to yield a slightly brown oil, which was purified by column chromatography (SiO<sub>2</sub>, toluene/EtOAc; 1:5) to yield the product as a colorless solid (3.11 g, 52%).

**<sup>1</sup>H NMR** (400 MHz, CDCl<sub>3</sub>) δ = 7.43 – 7.32 (m, 3H), 7.17 (d, *J*=8.5, 2H), 7.00 (d, *J*=8.6, 2H), 6.59 (d, *J*=8.5, 2H), 3.57 (s, 2H), 2.13 (s, 3H), 1.61 (s, 6H).

**<sup>13</sup>C NMR** (101 MHz, CDCl<sub>3</sub>) δ = 168.4, 147.5, 144.1, 140.9, 135.4, 127.7, 127.4, 119.8, 114.9, 42.0, 31.0, 24.6.

**HRMS** (ESI): *m/z* for C<sub>17</sub>H<sub>20</sub>N<sub>2</sub>ONa<sup>+</sup>; calcd. 291.1468, found 291.1477.

**M.p.** 160 °C.

### Bis-*N*-Boc-azobenzene 7a<sup>[2]</sup>

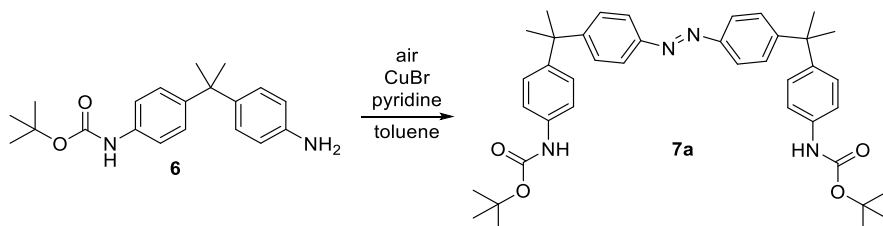

2-(4-Aminophenyl)-2-(4'-*N*-Boc-aminophenyl)propane (**6**) (324 mg, 993  $\mu\text{mol}$ , 1.00 eq.) was dissolved in toluene (5 mL). CuBr (11 mg, 80  $\mu\text{mol}$ , 8 mol%) and pyridine (18.5  $\mu\text{L}$ , 228  $\mu\text{mol}$ , 23 mol%) were added and the reaction mixture was heated to 60 °C under air exposure for 18.5 h. After cooling to rt, the solvent was evaporated under reduced pressure to yield a black solid, which was purified by column chromatography (SiO<sub>2</sub>, cyclohexane/EtOAc; 4:1) to yield the product as an orange solid (278 mg, 86%).

**<sup>1</sup>H NMR** (400 MHz, CDCl<sub>3</sub>)  $\delta$  = 7.78 (d,  $J$ =8.5, 4H), 7.35 (d,  $J$ =8.6, 4H), 7.29 – 7.23 (m, 4H), 7.17 (d,  $J$ =8.7, 4H), 6.43 (s, 2H), 1.69 (s, 12H), 1.51 (s, 18H).

**<sup>13</sup>C NMR** (101 MHz, CDCl<sub>3</sub>)  $\delta$  = 154.0, 153.0, 151.0, 145.1, 136.2, 127.6, 127.5, 122.5, 118.5, 80.6, 42.9, 30.9, 28.5.

**HRMS** (ESI):  $m/z$  for C<sub>40</sub>H<sub>48</sub>N<sub>4</sub>O<sub>4</sub>Na<sup>+</sup>; calcd. 671.3568, found 671.3570.

**M.p.** 105 °C.

### Azodianiline **7**

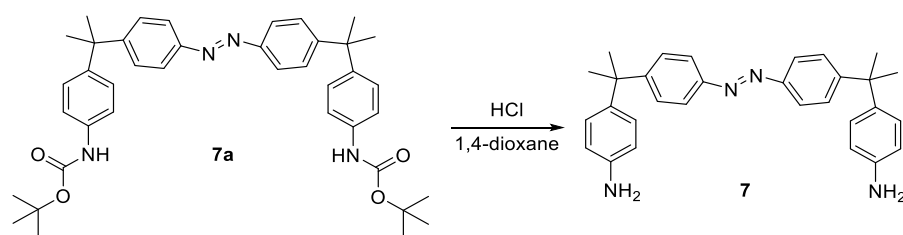

Bis-*N*-Boc-azobenzene **7a** (881 mg, 1.36 mmol, 1.00 eq.) was treated with HCl in dioxane (4 mol/L, 5.5 mL, 22 mmol, 16 eq.). The resulting suspension was stirred at rt for 60 min (TLC control showed full conversion after 45 min). The reaction was quenched by the consecutive addition of aq. NaOH (4 mol/L, 11 mL) and EtOAc (10 mL). After phase separation, the aqueous phase was extracted with EtOAc (5 mL) and the combined organic phases were dried over MgSO<sub>4</sub>. Filtration and removal of the solvents under reduced pressure afforded an orange solid, which was dried in high vacuum at 50 °C overnight (588 mg, 97%).

**<sup>1</sup>H NMR** (400 MHz, CDCl<sub>3</sub>)  $\delta$  = 7.78 (d,  $J$ =8.6, 4H), 7.37 (d,  $J$ =8.6, 4H), 7.04 (d,  $J$ =8.5, 4H), 6.62 (d,  $J$ =8.5, 4H), 3.56 (s, 4H), 1.68 (s, 12H).

**<sup>13</sup>C NMR** (101 MHz, CDCl<sub>3</sub>)  $\delta$  = 154.4, 150.8, 144.1, 140.4, 127.7, 127.5, 122.3, 114.9, 42.5, 30.8.

**HRMS** (ESI):  $m/z$  for C<sub>30</sub>H<sub>33</sub>N<sub>4</sub><sup>+</sup>; calcd. 449.2700, found 449.2700.

**M.p.** 175 – 177 °C.

(Z,Z)-Bisazo macrocycle 1<sup>[3]</sup>

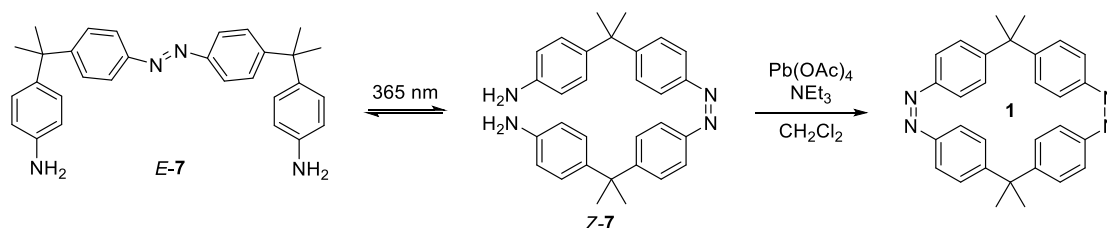

Azodianiline **7** (180 mg, 401  $\mu\text{mol}$ , 1.00 eq.) and NEt<sub>3</sub> (0.30 mL, 2.1 mmol, 5.3 eq.) were dissolved in CH<sub>2</sub>Cl<sub>2</sub> (40 mL). The flask was placed in an empty Dewar bowl for best light reflection and was covered with tin foil for protection from ambient light. Under irradiation of the azo solution with a LED at 365 nm, a solution of Pb(OAc)<sub>4</sub> (565 mg, 95%, 1.21 mmol, 3.02 eq.) in CH<sub>2</sub>Cl<sub>2</sub> (20 mL) was added dropwise within 55 min. After stirring for further 30 min, the solution was concentrated, and the residue was filtered through a silica plug (EtOAc wash). The obtained crude product was purified by flash column chromatography (SiO<sub>2</sub>, toluene/EtOAc; 25:1) to yield the product as a red, crystalline solid (34 mg, 19%).

<sup>1</sup>H NMR (400 MHz, CDCl<sub>3</sub>)  $\delta$  = 6.97 (d,  $J$ =8.6, 8H), 6.68 (d,  $J$ =8.5, 8H), 1.61 (s, 12H).

<sup>13</sup>C NMR (101 MHz, CDCl<sub>3</sub>)  $\delta$  = 151.2, 150.8, 126.9, 120.8, 42.7, 30.0.

HRMS (ESI):  $m/z$  for C<sub>30</sub>H<sub>28</sub>N<sub>4</sub>Na<sup>+</sup>; calcd. 467.2206, found 467.2203.

M.p. 267 °C (decomposition).

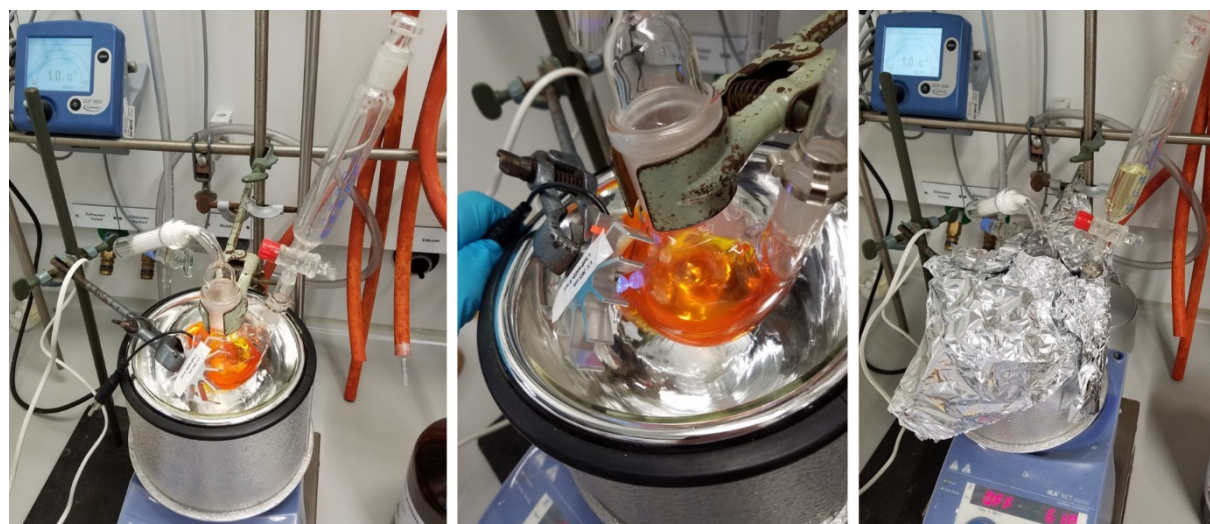

**Figure S2:** Macrocyclization setup for the synthesis of bisazo macrocycle **1**.

### Nitrosoacetamide **5**<sup>[4]</sup>

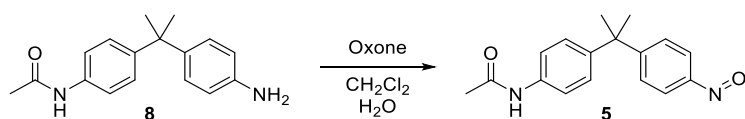

To a solution of 2-(4-Aminophenyl)-2-(4'-*N*-acetylamidophenyl)propane (**8**) (3.02 g, 11.3 mmol, 1.00 eq.) in CH<sub>2</sub>Cl<sub>2</sub> (240 mL) under a nitrogen atmosphere a solution of Oxone<sup>®</sup> (13.8 g, 22.5 mmol, 2.00 eq.) in water (970 mL) was added. The biphasic mixture was vigorously stirred for 20 h at rt and the phases were separated afterwards. The organic phase was washed with 1 M HCl (200 mL), sat. aq. NaHCO<sub>3</sub> (200 mL) and brine (200 mL) and was dried over MgSO<sub>4</sub>. After filtration and evaporation of the solvent under reduced pressure, a green oil was obtained, which was purified by medium pressure liquid chromatography (SiO<sub>2</sub>, cyclohexane/EtOAc; 0 to 35% EtOAc) to yield the product as a green, crystalline solid (2.51 g, ca. 79%). The product was immediately used without further purification.

<sup>1</sup>H NMR (400 MHz, CDCl<sub>3</sub>) δ = 7.80 (d, *J*=8.5, 2H), 7.51 – 7.38 (m, 4H), 7.24 – 7.09 (m, 3H), 2.16 (s, 3H), 1.71 (s, 6H).

<sup>13</sup>C NMR (101 MHz, CDCl<sub>3</sub>) δ = 168.4, 165.1, 159.2, 145.2, 136.1, 127.7, 127.4, 121.1, 120.0, 43.6, 30.5, 24.7.

HRMS (ESI): *m/z* for C<sub>17</sub>H<sub>18</sub>N<sub>2</sub>O<sub>2</sub>Na<sup>+</sup>; calcd. 305.1260, found 305.1266.

### Bisazodianiline **9**<sup>[5]</sup>

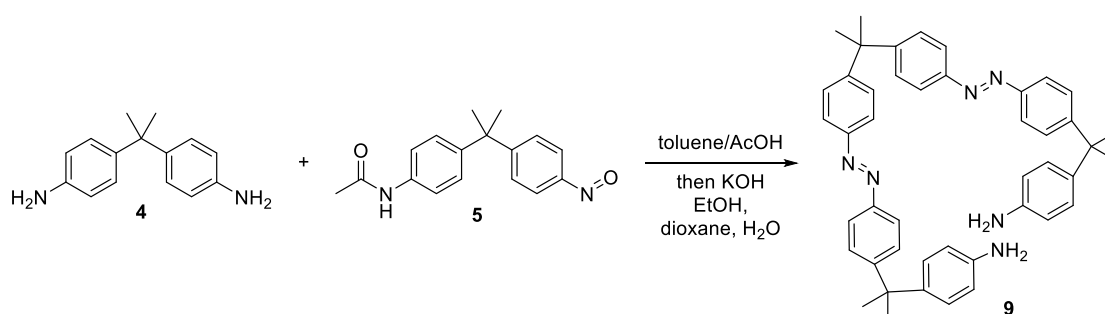

A solution of nitroso compound **5** (2.50 g, 8.85 mmol, 2.20 eq.) and AcOH (461 μL, 8.06 mmol, 2.00 eq.) in toluene (80 mL) was degassed in a nitrogen stream for 20 min. Then, 2,2-bis(4-aminophenyl)propane (911 mg, 4.03 mmol, 1.00 eq.) was added and the solution was stirred at 60 °C under a nitrogen atmosphere for 18 h. Then, AcOH (240 mL) was added and stirring at 60 °C was continued for further 5 d. Evaporation of the solvents under reduced



pressure led to a brown solid, which was suspended in a solution of KOH (85%, 72 g, 1.1 mol) in a mixture of EtOH/1,4-dioxane/H<sub>2</sub>O (7:3:1, 250 mL, ca 4 mol/L KOH). The mixture was heated to reflux for 23 h, cooled to rt and was poured on ice (ca 200 g). After the addition of CH<sub>2</sub>Cl<sub>2</sub> (400 mL), the organic phase was separated, dried over MgSO<sub>4</sub>, filtered and concentrated under reduced pressure. The crude product was purified by column chromatography (SiO<sub>2</sub>, toluene/EtOAc; 2:1) to yield a red solid (2.81 g, ca. 97% over two steps). An analytically pure sample was obtained by a second flash column chromatography (SiO<sub>2</sub>, toluene/EtOAc; 2:1).

<sup>1</sup>H NMR (400 MHz, CDCl<sub>3</sub>) δ = 7.88 – 7.75 (m, 8H), 7.44 – 7.35 (m, 8H), 7.04 (d, *J*=8.4, 4H), 6.62 (d, *J*=8.3, 4H), 3.59 (s, 4H), 1.78 (s, 6H), 1.69 (s, 12H).

<sup>13</sup>C NMR (101 MHz, CDCl<sub>3</sub>) δ = 154.6, 153.3, 151.1, 150.8, 144.3, 140.5, 127.8, 127.7, 127.6, 122.6, 122.5, 115.0, 43.6, 42.6, 30.9, 30.8.

HRMS (ESI): *m/z* for C<sub>45</sub>H<sub>47</sub>N<sub>6</sub><sup>+</sup>; calcd. 671.3857, found 671.3858.

M.p. 197 °C.

### Trisazo macrocycle **2**<sup>[6]</sup>

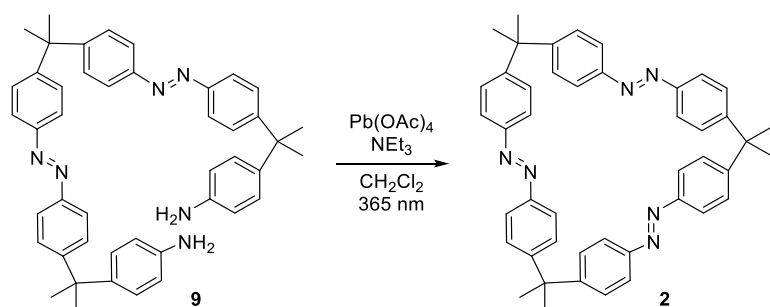

A three-necked flask was equipped with two 250 mL dropping funnels. One funnel was loaded with a solution of bisazodianiline precursor **9** (337 mg, 0.502 mmol, 1.00 eq.) and NEt<sub>3</sub> (1.04 mL, 7.48 mmol, 14.9 eq.) in CH<sub>2</sub>Cl<sub>2</sub> (165 mL, 3 mmol/L) and the other dropping funnel was loaded with a solution of Pb(OAc)<sub>4</sub> (699 mg, 95%, 1.50 mmol, 2.98 eq.) in CH<sub>2</sub>Cl<sub>2</sub> (165 mL). Both solutions were added dropwise into CH<sub>2</sub>Cl<sub>2</sub> (150 mL) within 1 h 20 min, while the bisazo-precursor solution was irradiated at 365 nm with a LED continuously. After complete addition, the solution was stirred at rt for 30 min and was concentrated under reduced pressure. The residue was filtered over a silica plug (CH<sub>2</sub>Cl<sub>2</sub> wash) and the solvent was evaporated. The oily dark red residue was purified by flash column

chromatography (SiO<sub>2</sub>, toluene) to yield a red solid, which was dried in high vacuum (9 mg, 3%).

<sup>1</sup>H NMR (400 MHz, CDCl<sub>3</sub>) δ = 7.53 (d, *J*=8.7, 12H), 7.30 – 7.11 (m, 12H), 1.92 (s, 18H).

<sup>13</sup>C NMR (101 MHz, CDCl<sub>3</sub>) δ = 152.3, 150.9, 126.7, 123.0, 43.0, 27.0.

HRMS (ESI): *m/z* for C<sub>45</sub>H<sub>42</sub>N<sub>6</sub>Na<sup>+</sup>; calcd. 689.3363, found 689.3363.

M.p. >360 °C.

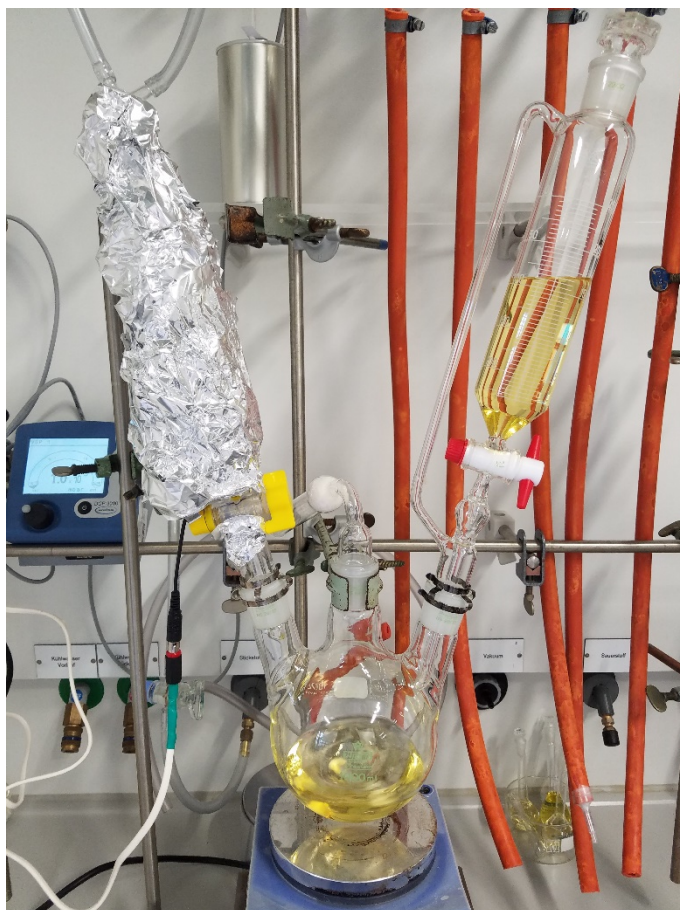

Figure S3: Macrocyclization setup for the synthesis of trisazo macrocycle 2.

### Trisazodianiline 10

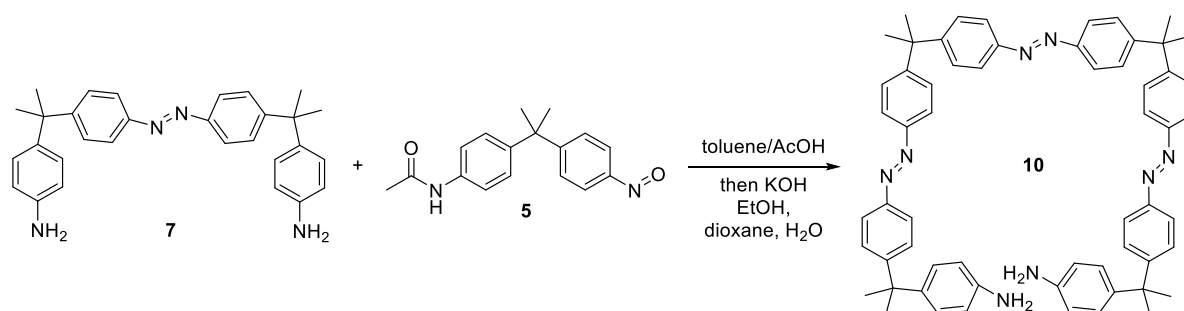

Nitrosoacetamide **5** (873 mg, 3.09 mmol, 2.49 eq.) and AcOH (143  $\mu$ L, 2.49 mmol, 2.00 eq.) were dissolved in toluene (28 mL) and the solution was degassed in a nitrogen-stream for 15 min. After the addition of azodianiline **7** (558 mg, 1.24 mmol, 1.00 eq.), the solution was stirred at 60 °C for 29 h. Following, AcOH (84 mL) was added and stirring was continued at 60 °C for further 38 h. After evaporation of the solvents under reduced pressure, the residue was recrystallized from toluene and washed with cold toluene and *n*-pentane. After drying in vacuum, the yellow to brown solid (708 mg, 0.724 mmol, 1.00 eq.) and KOH (85%, 11.5 g, 174 mmol, 240 eq.) were suspended in EtOH/1,4-dioxane/H<sub>2</sub>O (7:3:1, 44 mL, ca 4 mol/L KOH) and heated to reflux for 21 h. Following, the mixture was poured on ice (ca 75 g) and CH<sub>2</sub>Cl<sub>2</sub> (100 mL) was added. After phase separation, the aqueous phase was extracted with CH<sub>2</sub>Cl<sub>2</sub> (2 x 50 mL) and the combined organic phases were washed with brine (100 mL), dried over MgSO<sub>4</sub>, filtered and the solvents were evaporated under reduced pressure. The residue was suspended in hot toluene, the insoluble material was filtered off and was washed with hot toluene. The filtrate was evaporated under reduced pressure to yield a red to brown solid, which was recrystallized from few toluene. After cooling in an ice bath, a few drops of *n*-pentane were added to the cold solution to induce crystallization. The precipitate was filtered off, washed with *n*-pentane and was dried in high vacuum to yield a yellow to orange solid (542 mg, 49% over two steps).

<sup>1</sup>H NMR (400 MHz, C<sub>2</sub>D<sub>2</sub>Cl<sub>4</sub>)  $\delta$  = 7.86 – 7.75 (m, 12H), 7.44 – 7.35 (m, 12H), 7.05 (d, *J*=8.6, 4H), 6.62 (d, *J*=8.5, 4H), 3.63 (s, 4H), 1.79 (s, 12H), 1.69 (s, 12H).

<sup>13</sup>C NMR (101 MHz, C<sub>2</sub>D<sub>2</sub>Cl<sub>4</sub>)  $\delta$  = 154.4, 153.2, 153.0, 150.7, 150.7, 150.4, 143.8, 140.1, 127.5, 127.4, 127.4, 122.5, 122.4, 122.2, 114.8, 43.3, 42.2, 30.6, 30.5.

HRMS (ESI): *m/z* for C<sub>60</sub>H<sub>61</sub>N<sub>8</sub><sup>+</sup>; calcd. 893.5013, found 893.5013.

M.p. 125 – 127 °C.

### Tetraazo macrocycle **3**

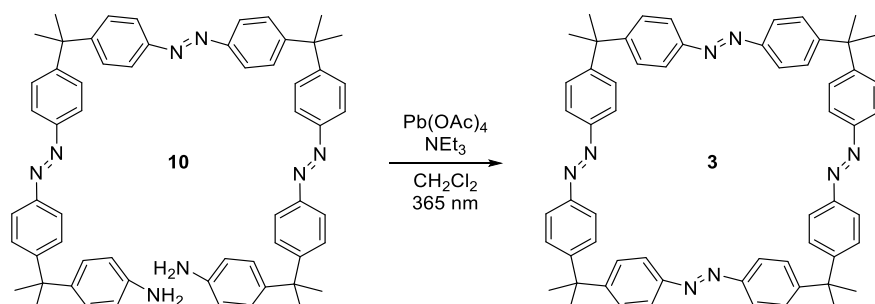

A solution of trisazodianiline **10** (149 mg, 0.167 mmol, 1.00 eq.) and NEt<sub>3</sub> (117 μL, 842 μmol, 5.05 eq.) in CH<sub>2</sub>Cl<sub>2</sub> (170 mL) was continuously irradiated at 365 nm using a LED. To the stirred and irradiated solution, Pb(OAc)<sub>4</sub> (240 mg, 95%, 514 μmol, 3.08 eq.) in CH<sub>2</sub>Cl<sub>2</sub> (85 mL) was added dropwise at rt within 1 h. After stirring for further 15 min, Na<sub>2</sub>EDTA · 2 H<sub>2</sub>O (350 mg, 841 μmol, 5.04 eq.) in water (85 mL) was added and the biphasic mixture was stirred vigorously for 30 min. Then, the layers were separated, and the organic phase was washed with brine (150 mL), was dried over MgSO<sub>4</sub>, filtered, and evaporated under reduced pressure to yield a dark red solid. The macrocycle was separated by column chromatography (SiO<sub>2</sub>, toluene/EtOAc; 20:1) from the crude mixture. The obtained red solid was washed with CH<sub>2</sub>Cl<sub>2</sub> and *n*-pentane to yield the product as an orange solid (17 mg 12%). It was found that the compound was insoluble in almost all common organic solvents except of 1,1,2,2-tetrachloroethane (solubility ca 1 mg/mL).

**<sup>1</sup>H NMR** (400 MHz, C<sub>2</sub>D<sub>2</sub>Cl<sub>4</sub>) δ = 7.75 (d, *J*=8.3, 16H), 7.30 (d, *J*=8.3, 16H), 1.83 (s, 24H).

**<sup>13</sup>C NMR** (101 MHz, C<sub>2</sub>D<sub>2</sub>Cl<sub>4</sub>) δ = 153.3, 150.4, 127.2, 122.5, 42.9, 29.2.

**HRMS** (APCI): *m/z* for C<sub>60</sub>H<sub>57</sub>N<sub>8</sub><sup>+</sup>; calcd. 889.4701, found 889.4697.

**M.p.** >360 °C.

# $^1\text{H}$ - and $^{13}\text{C}\{^1\text{H}\}$ -NMR Spectra

4

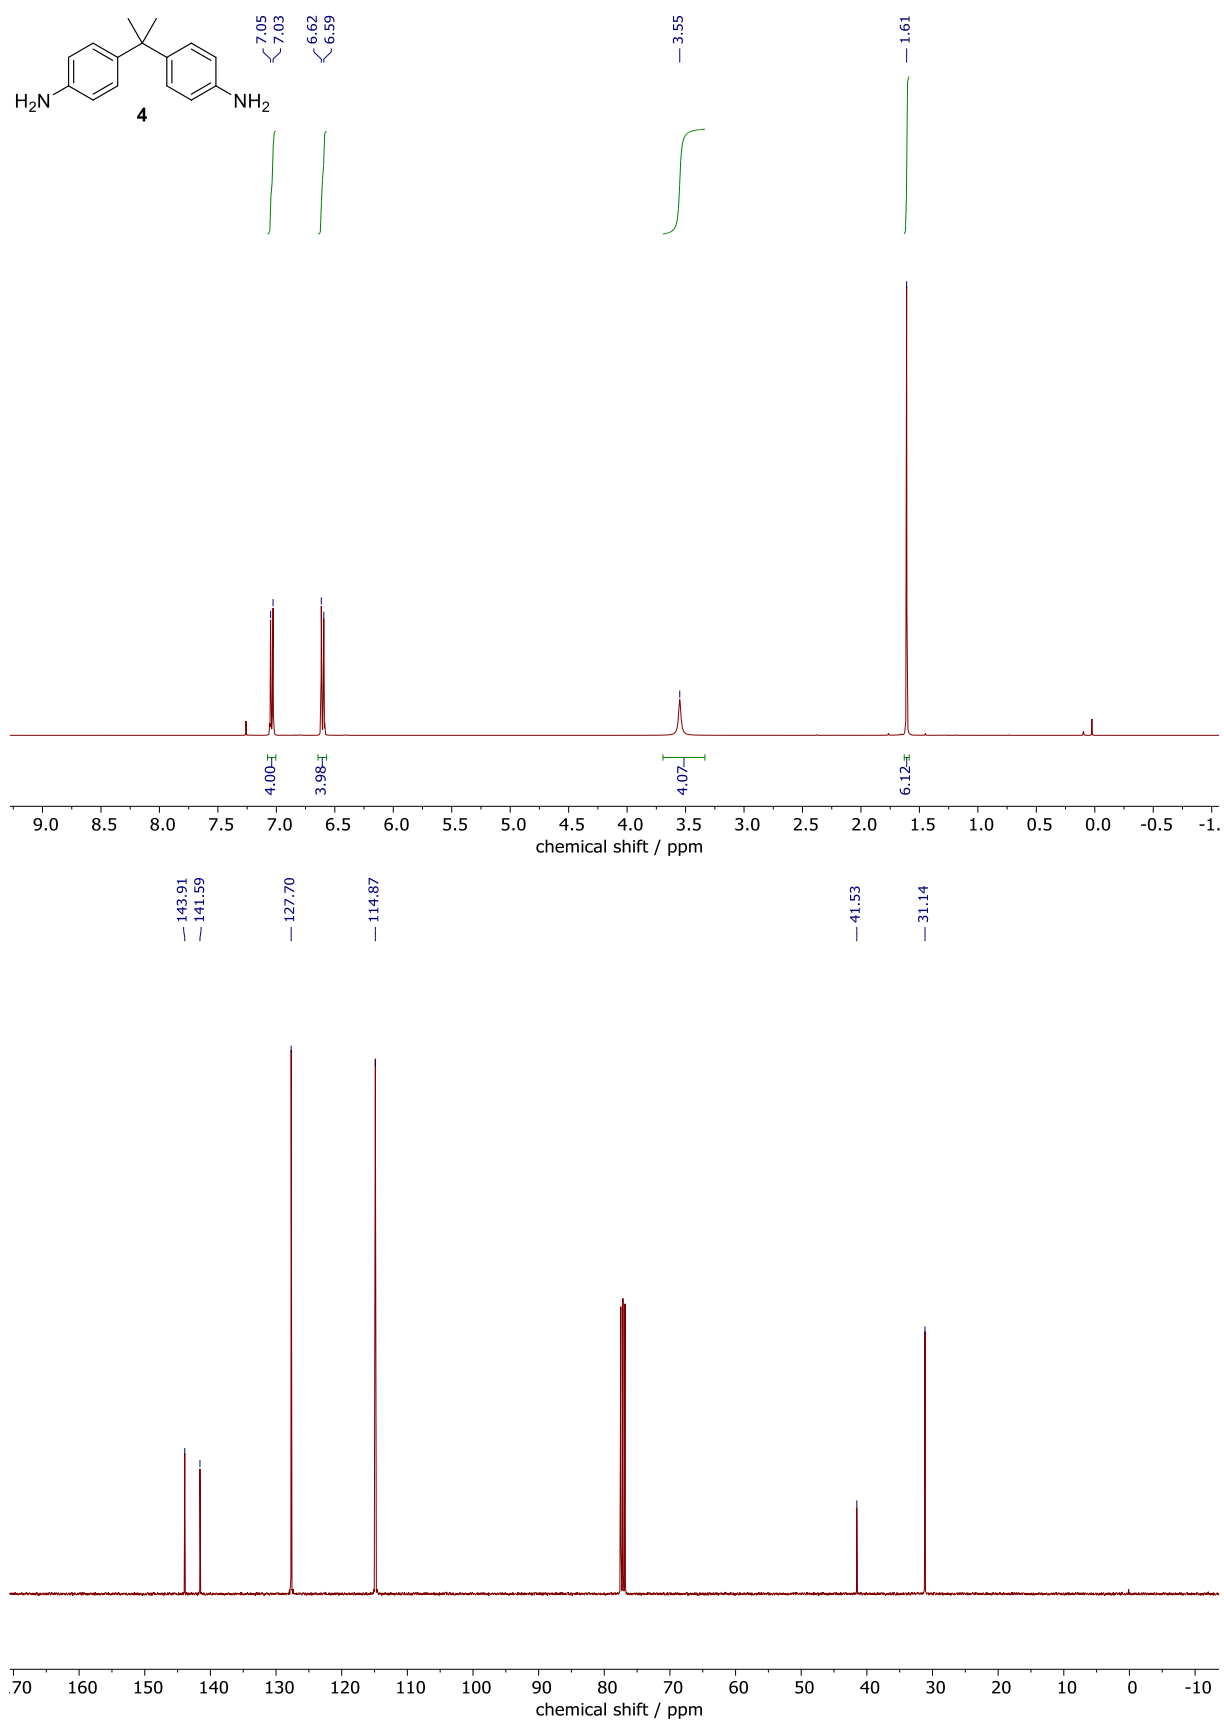

6

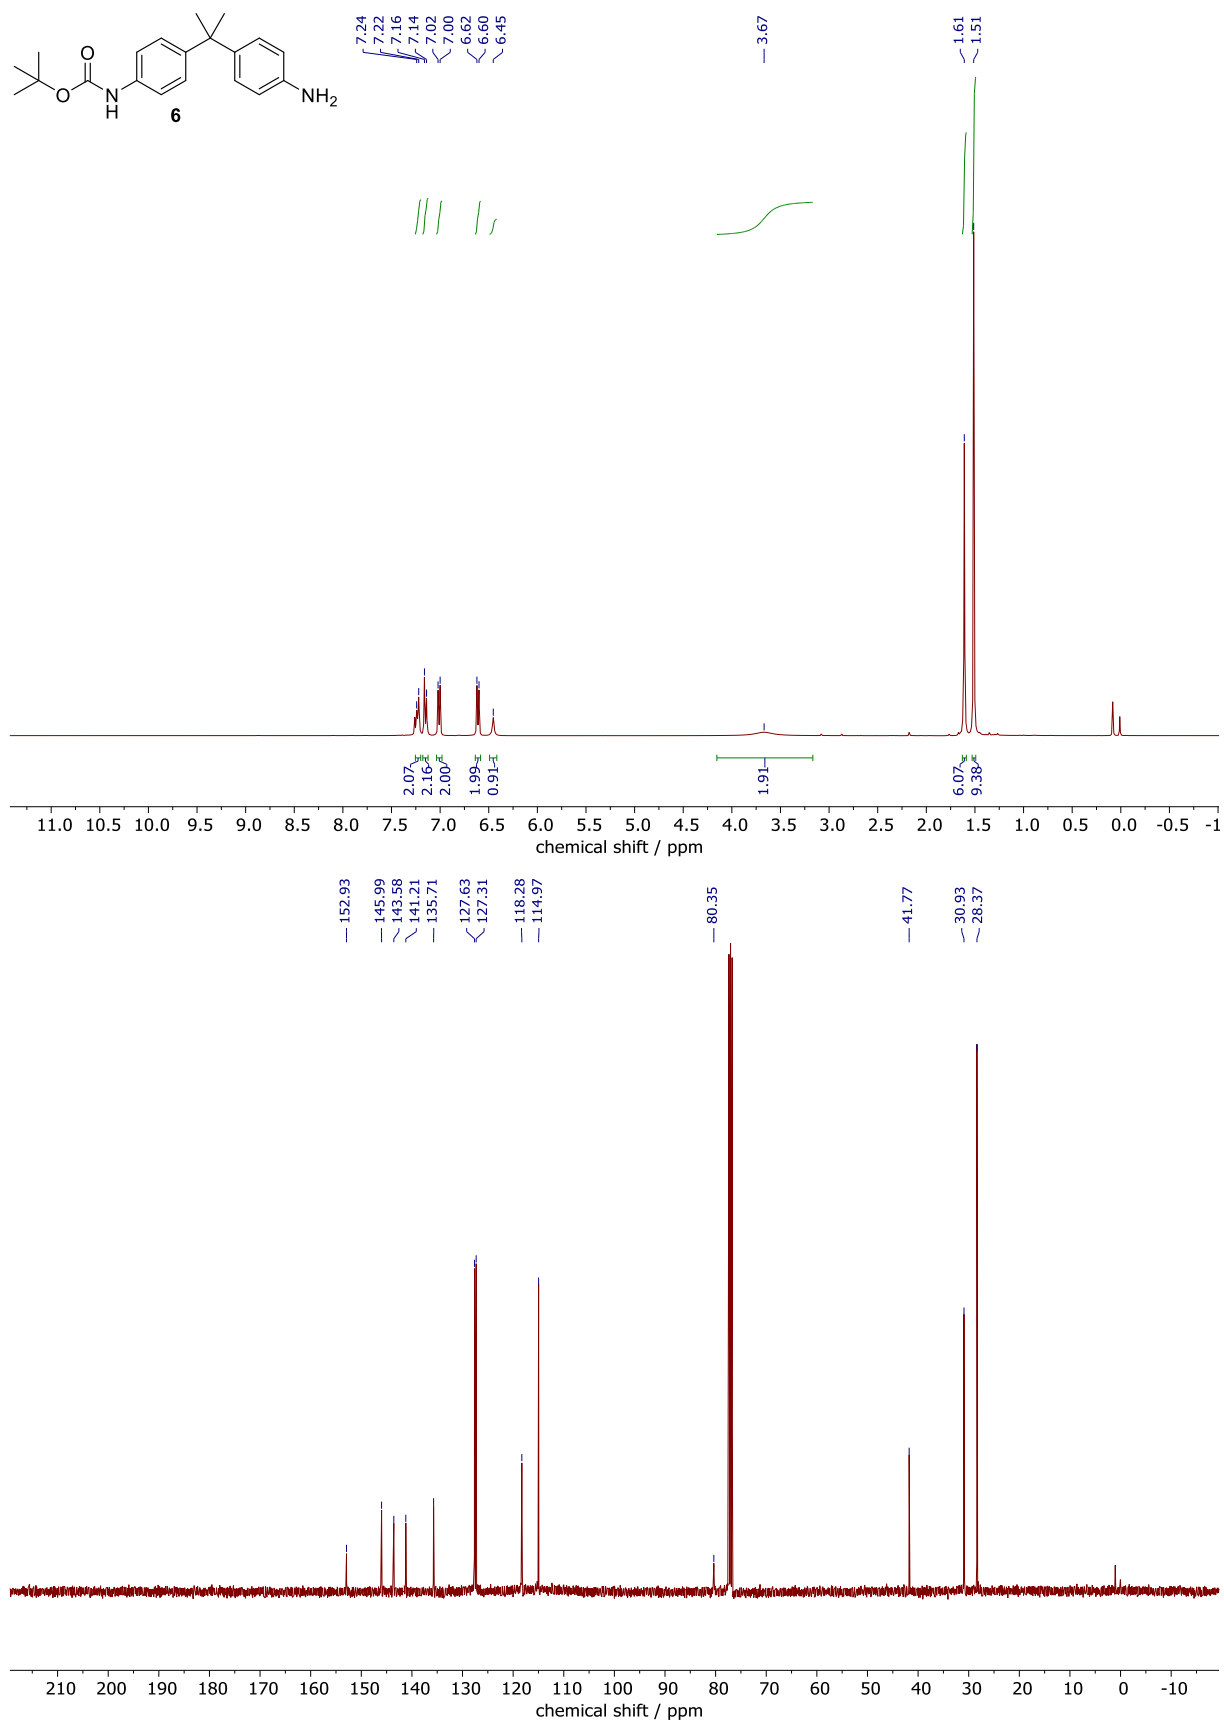

8

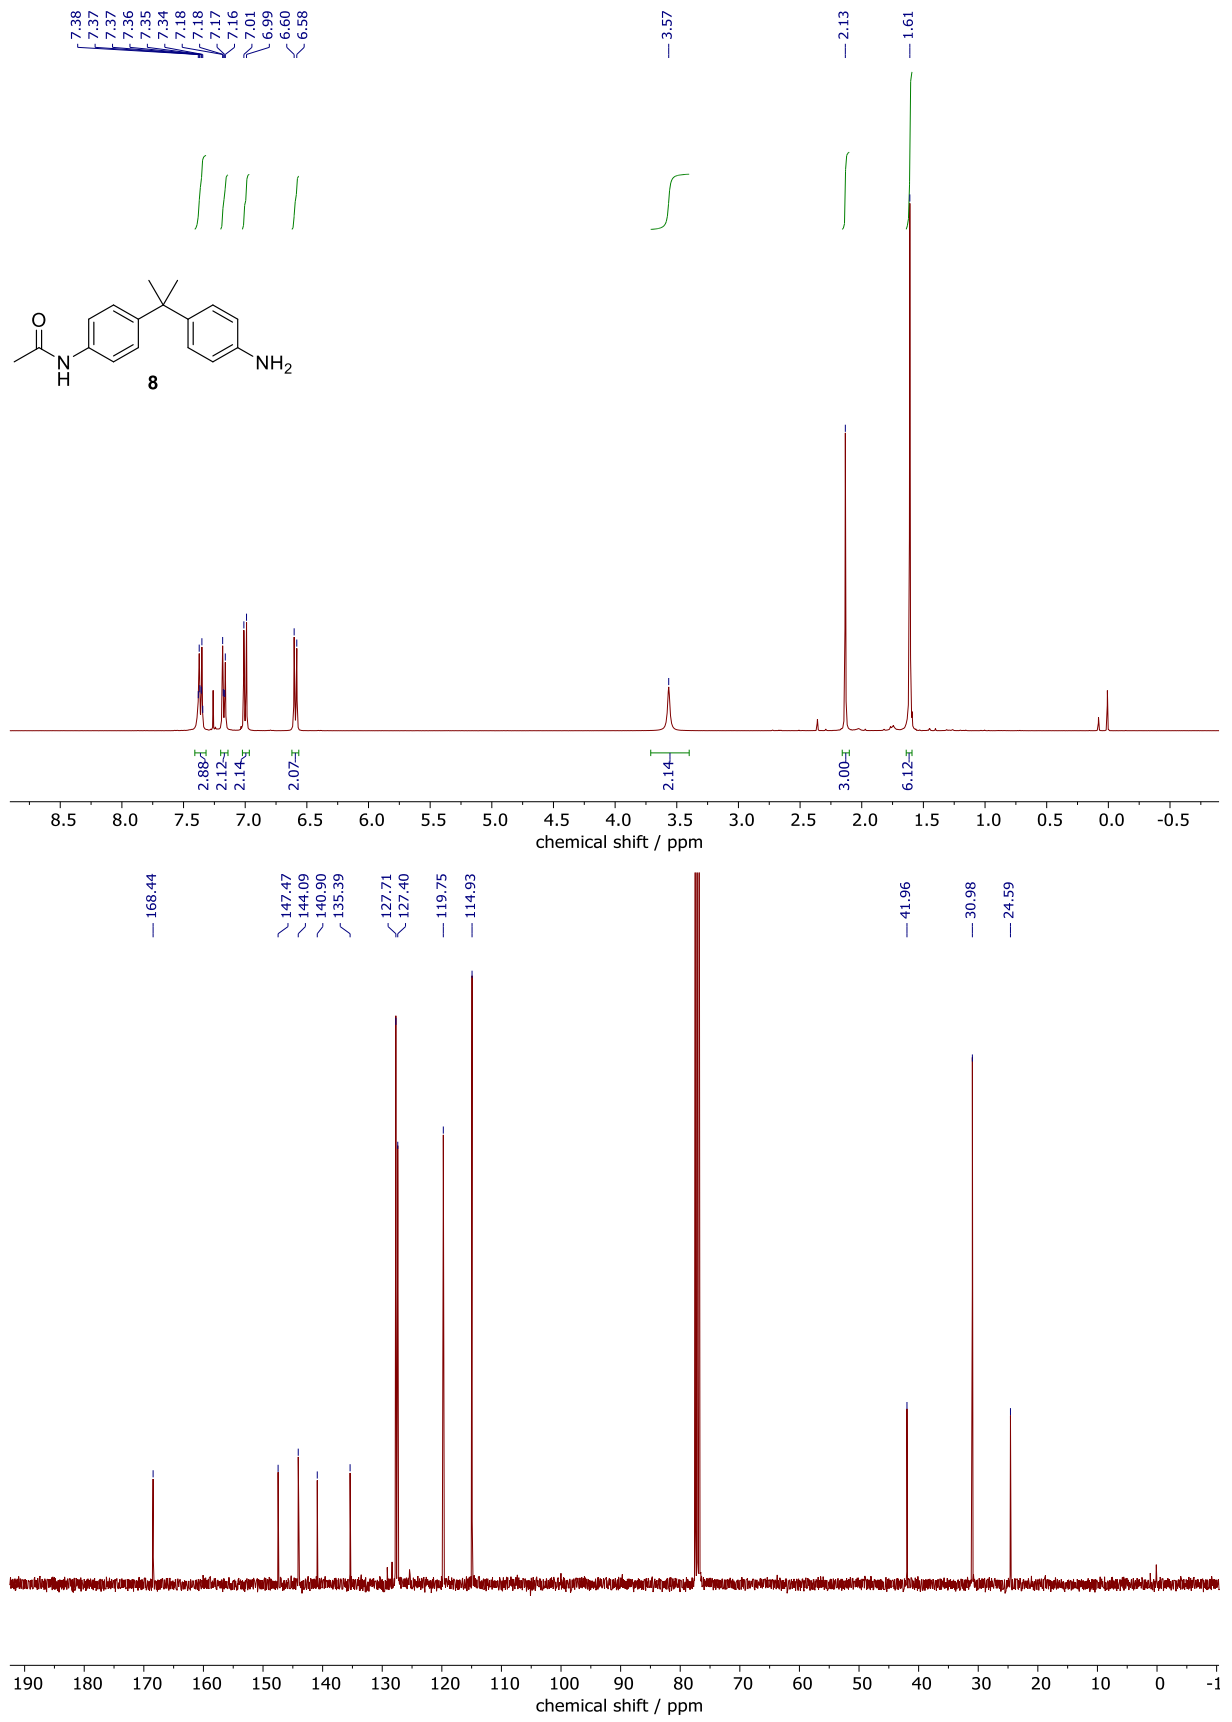

7a

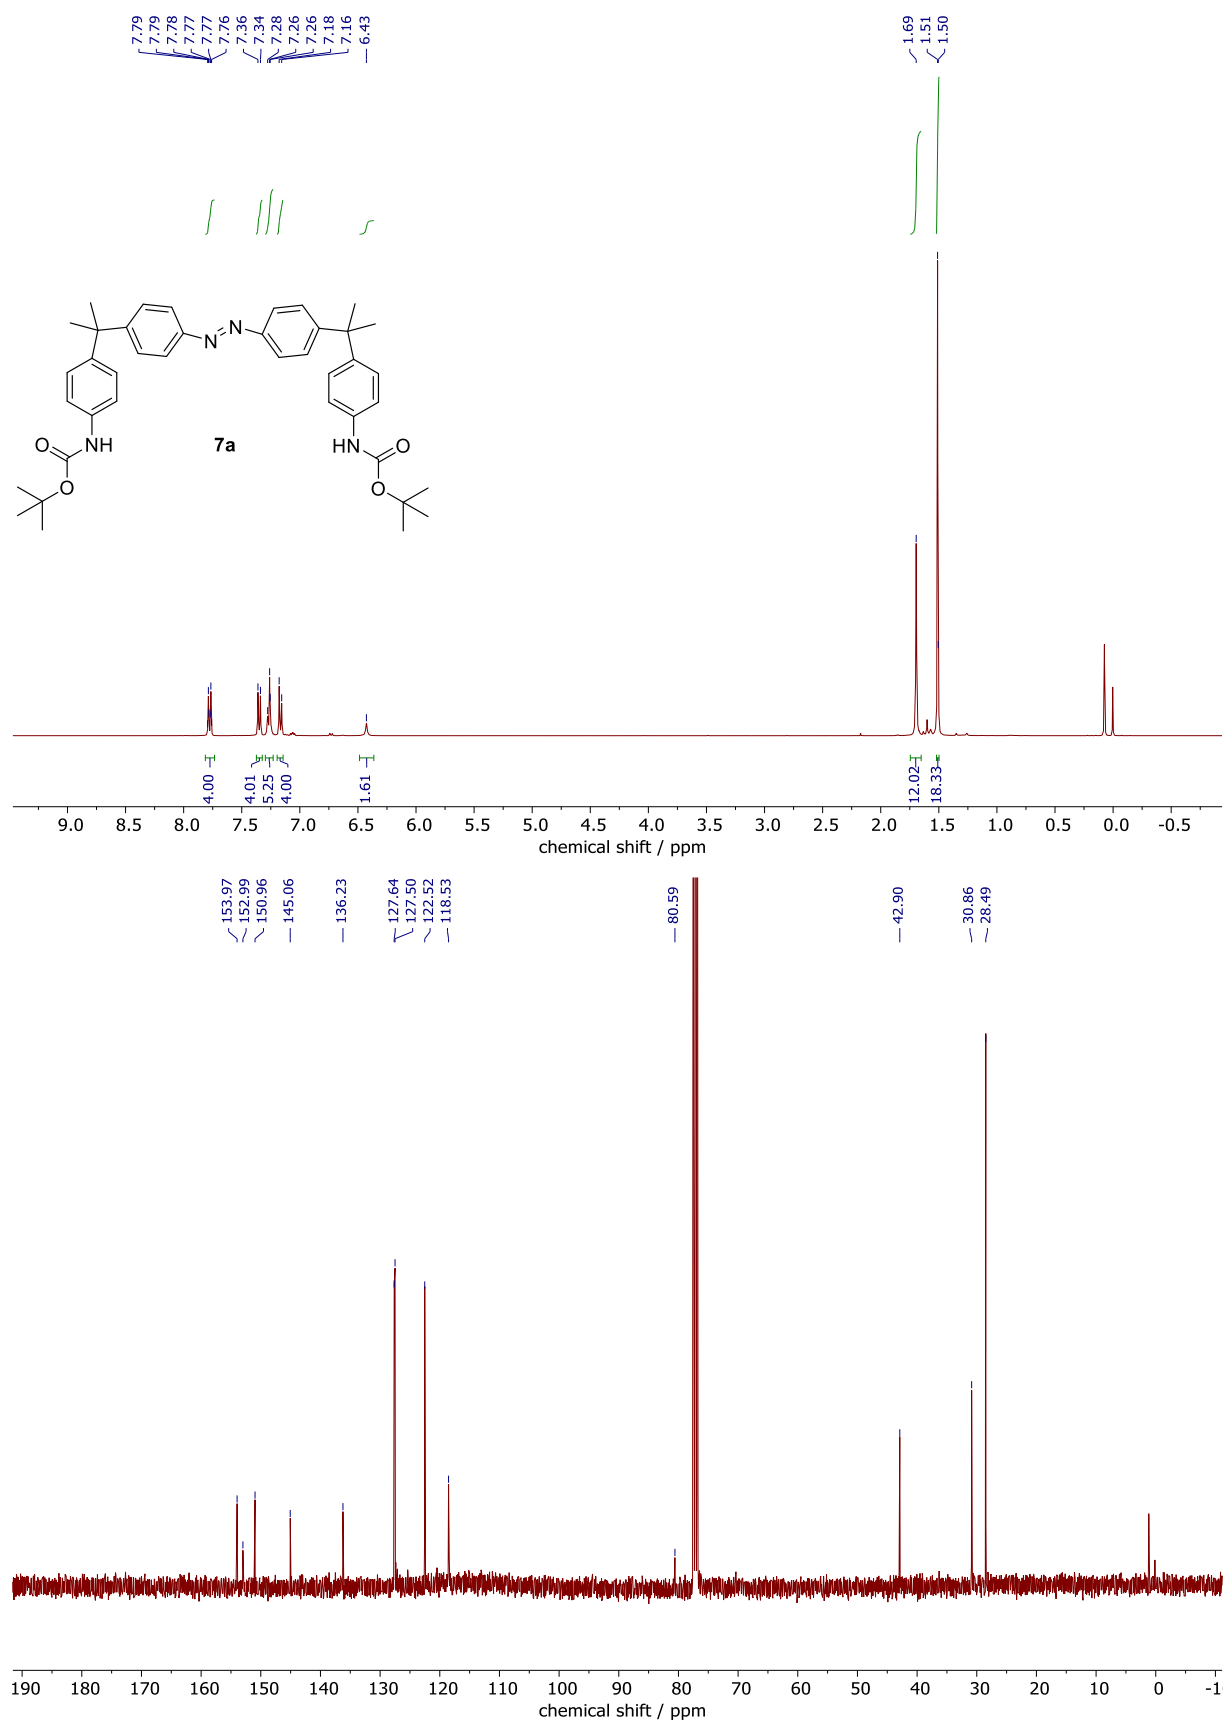



7

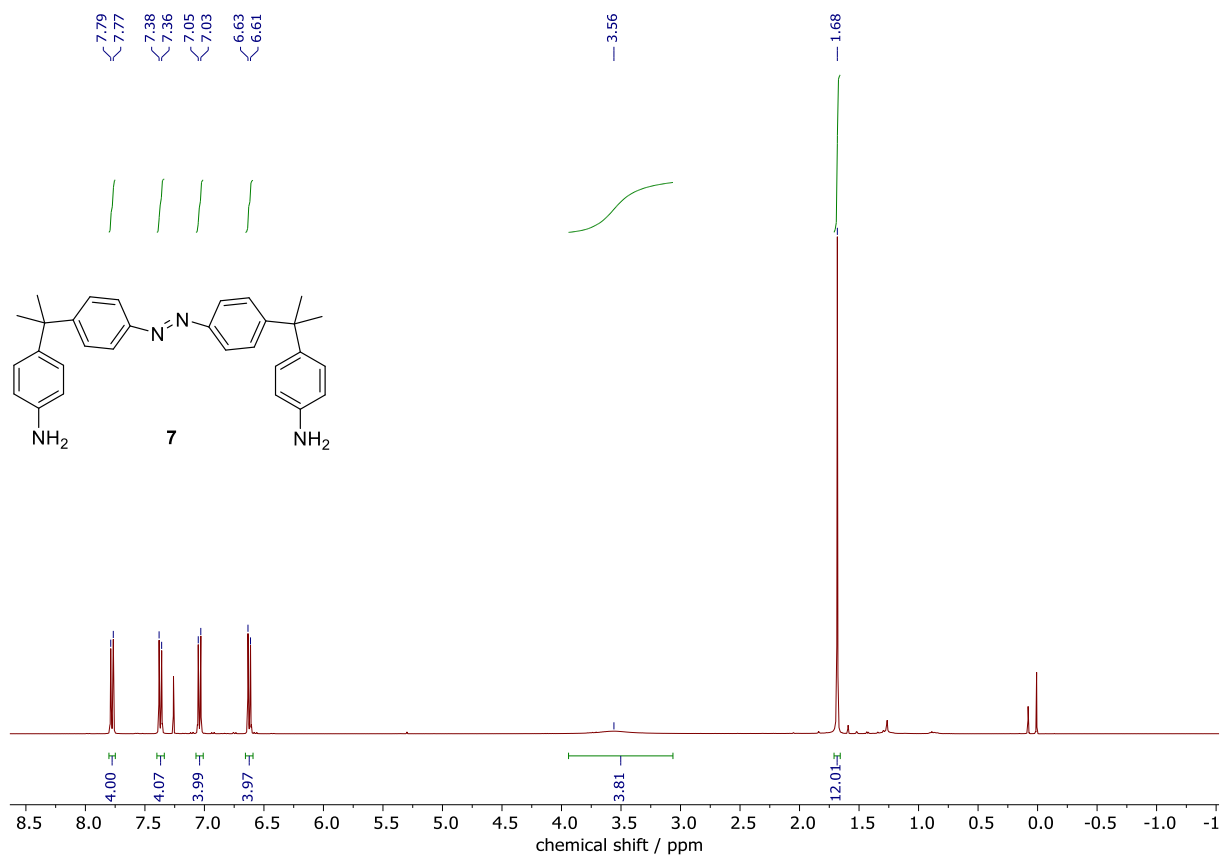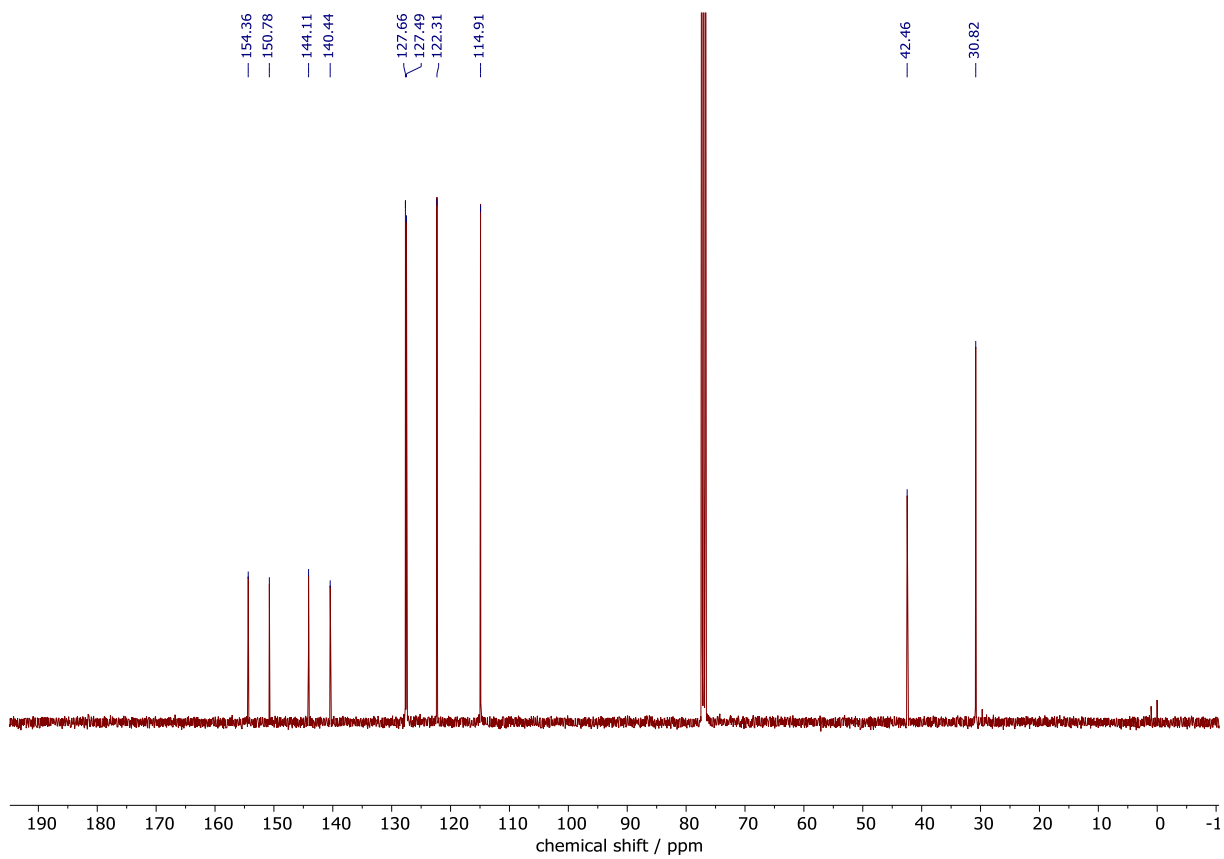

1

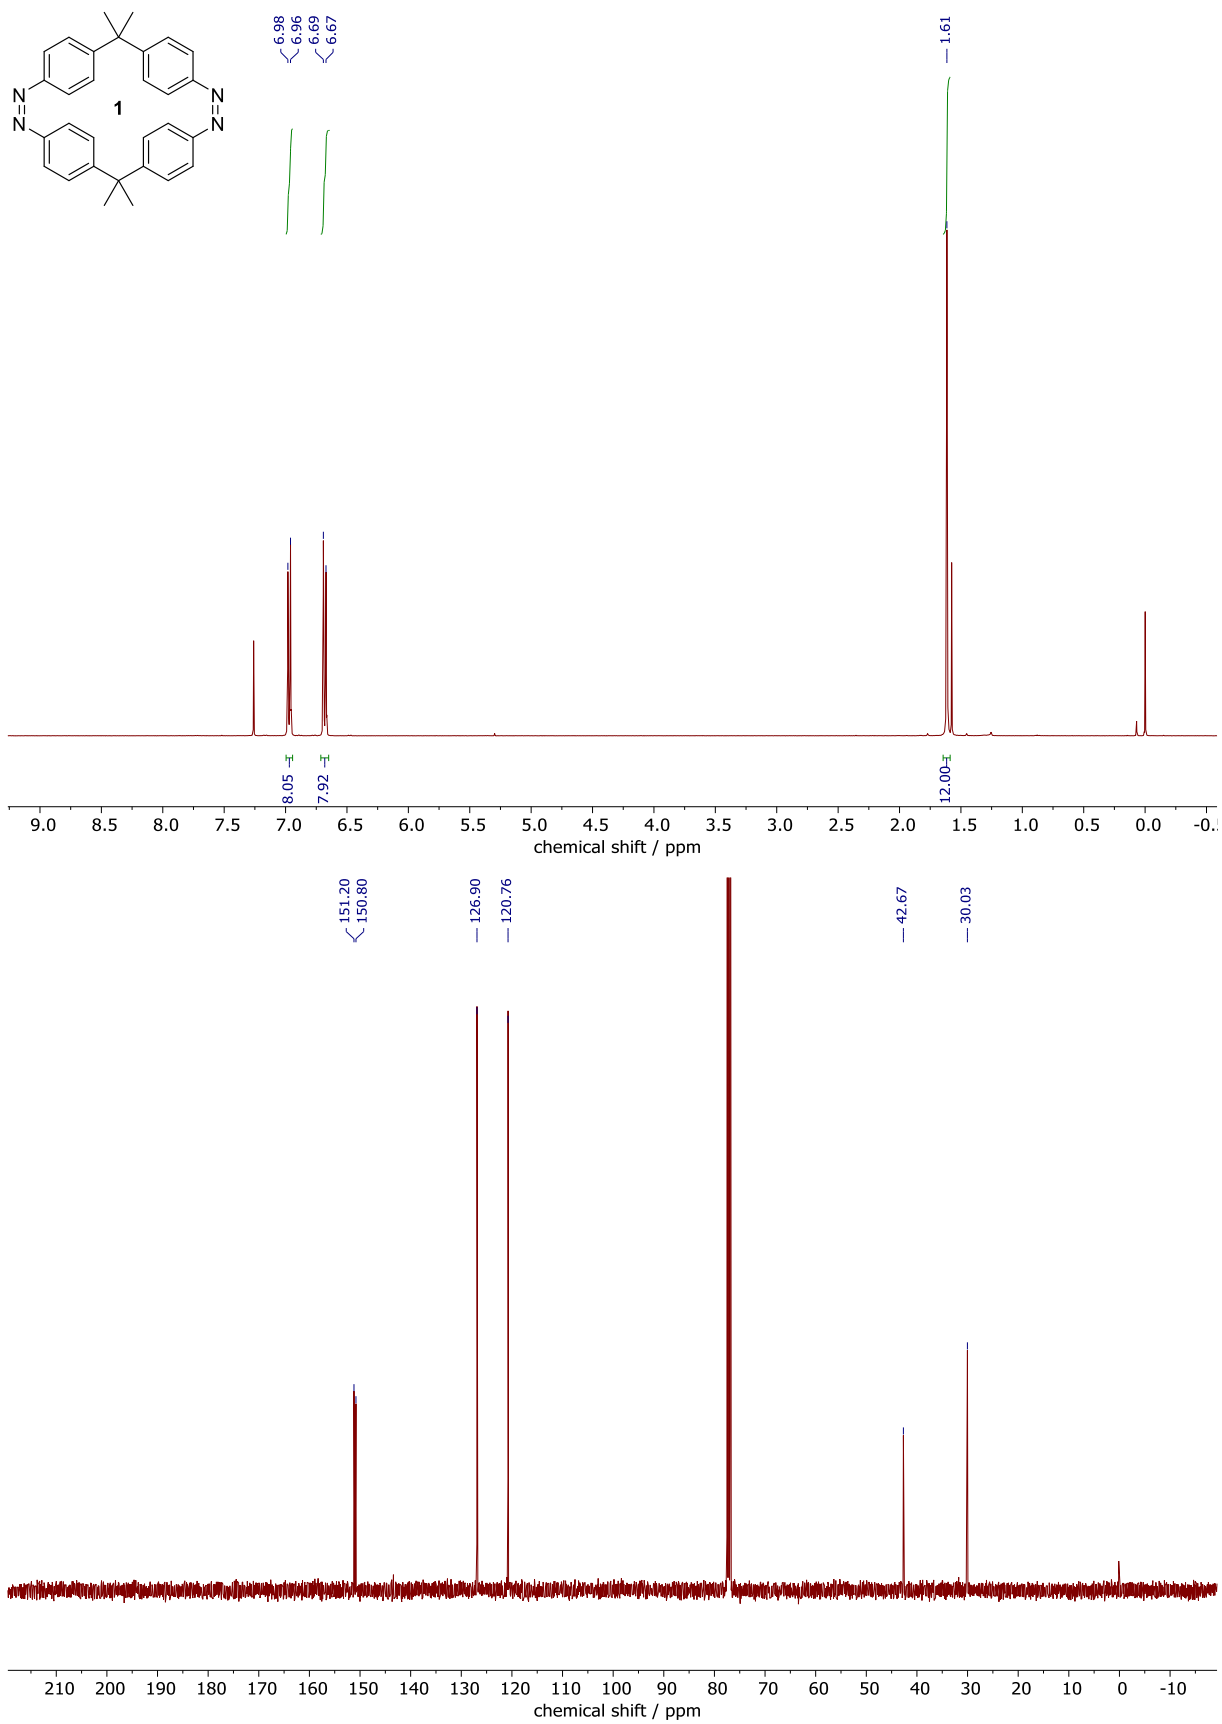

5

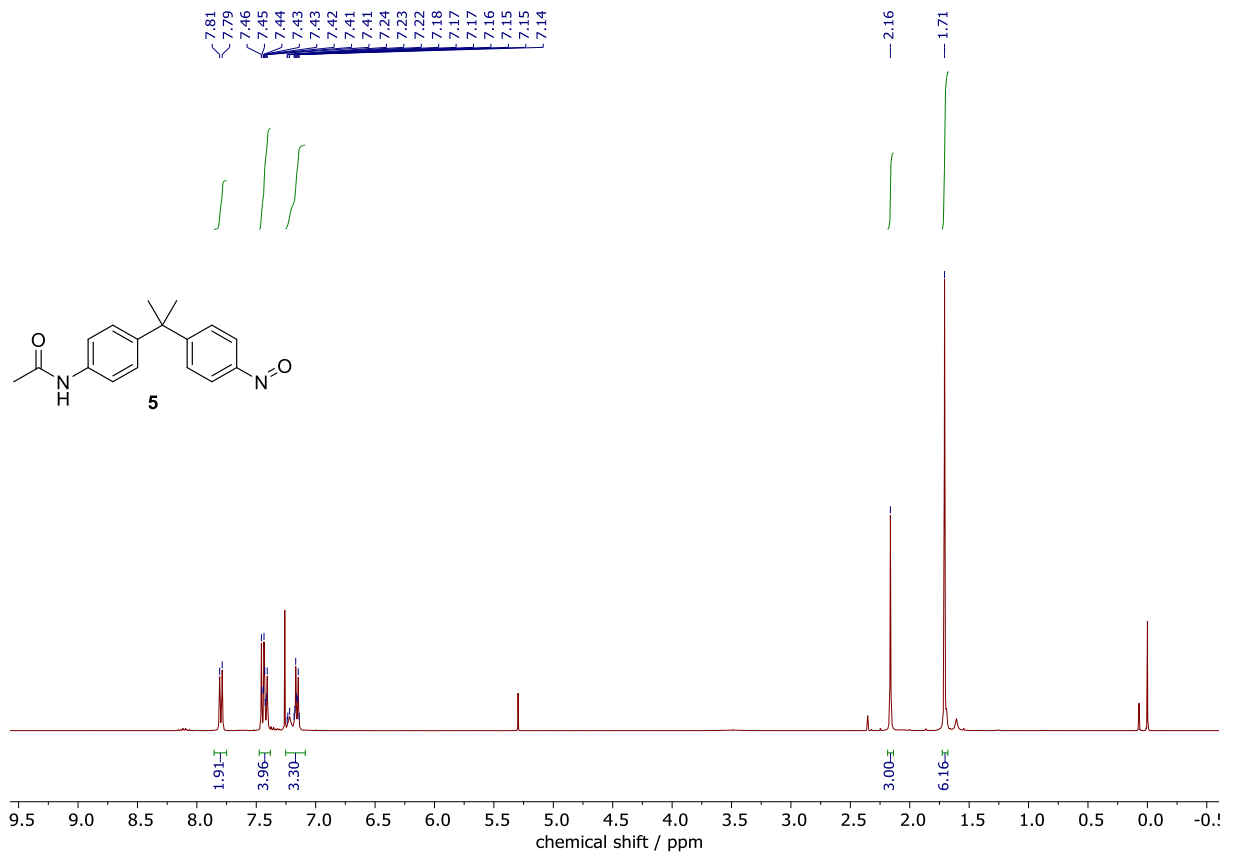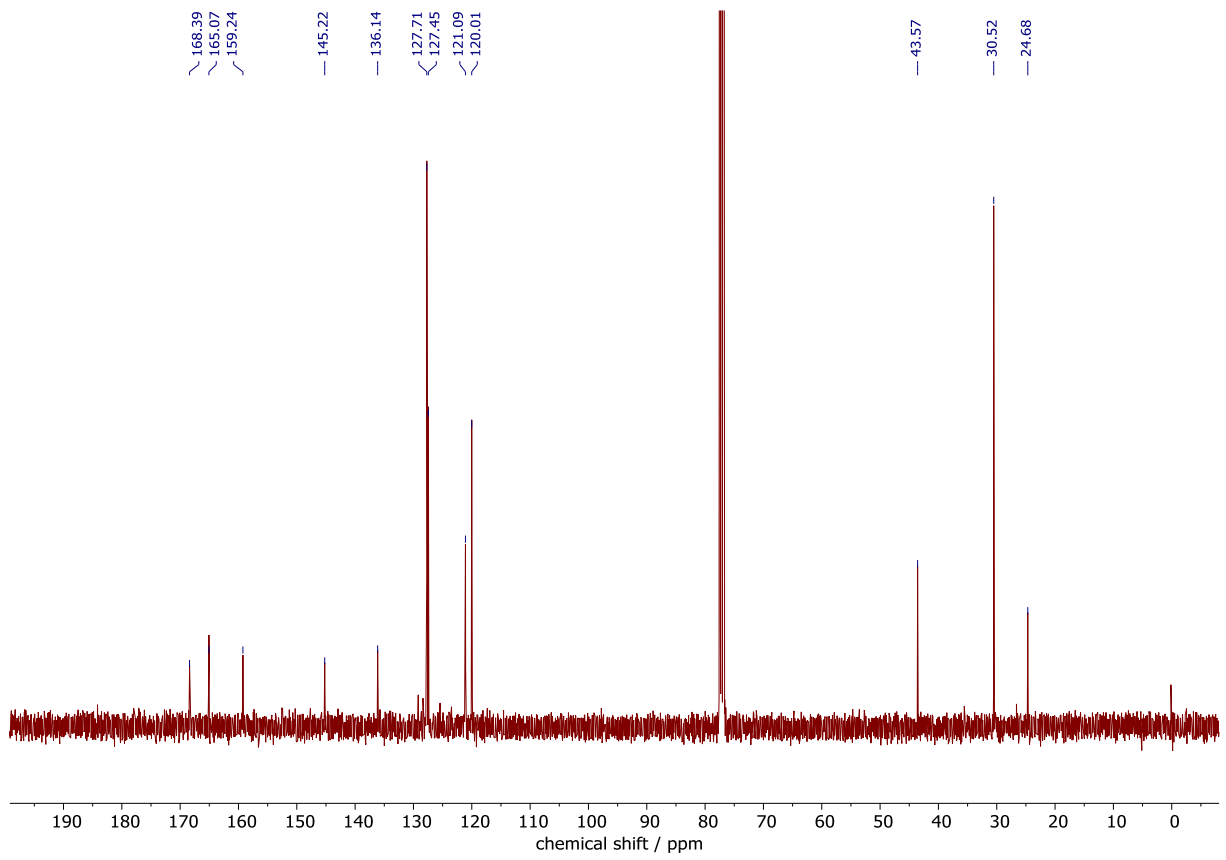

9

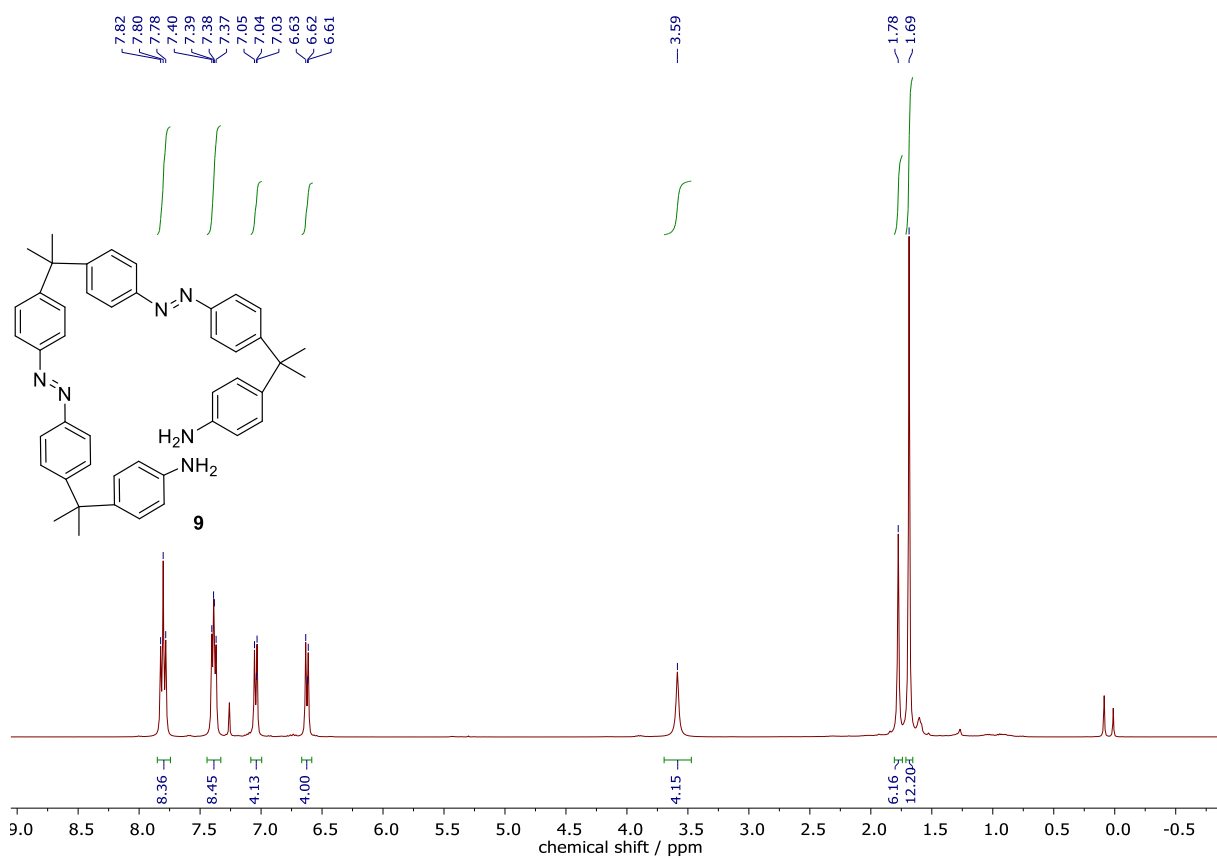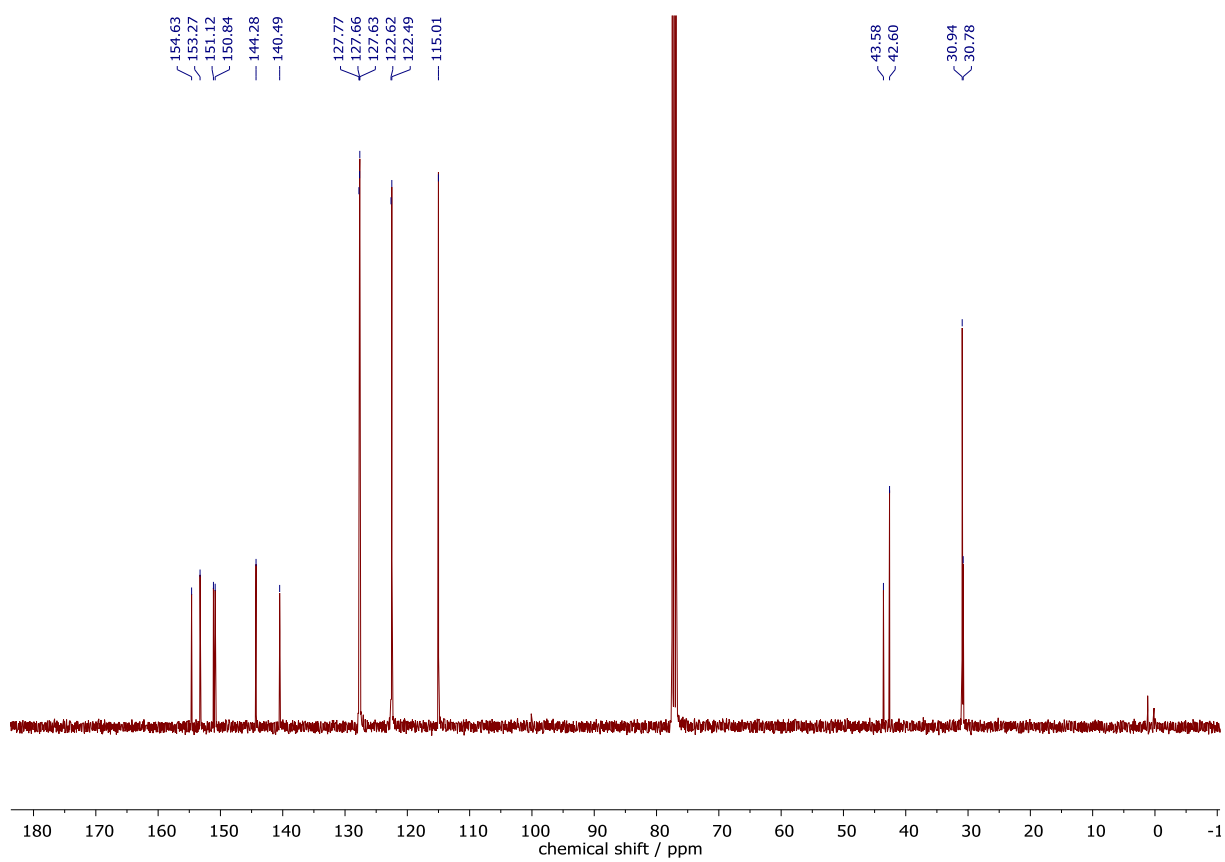

2

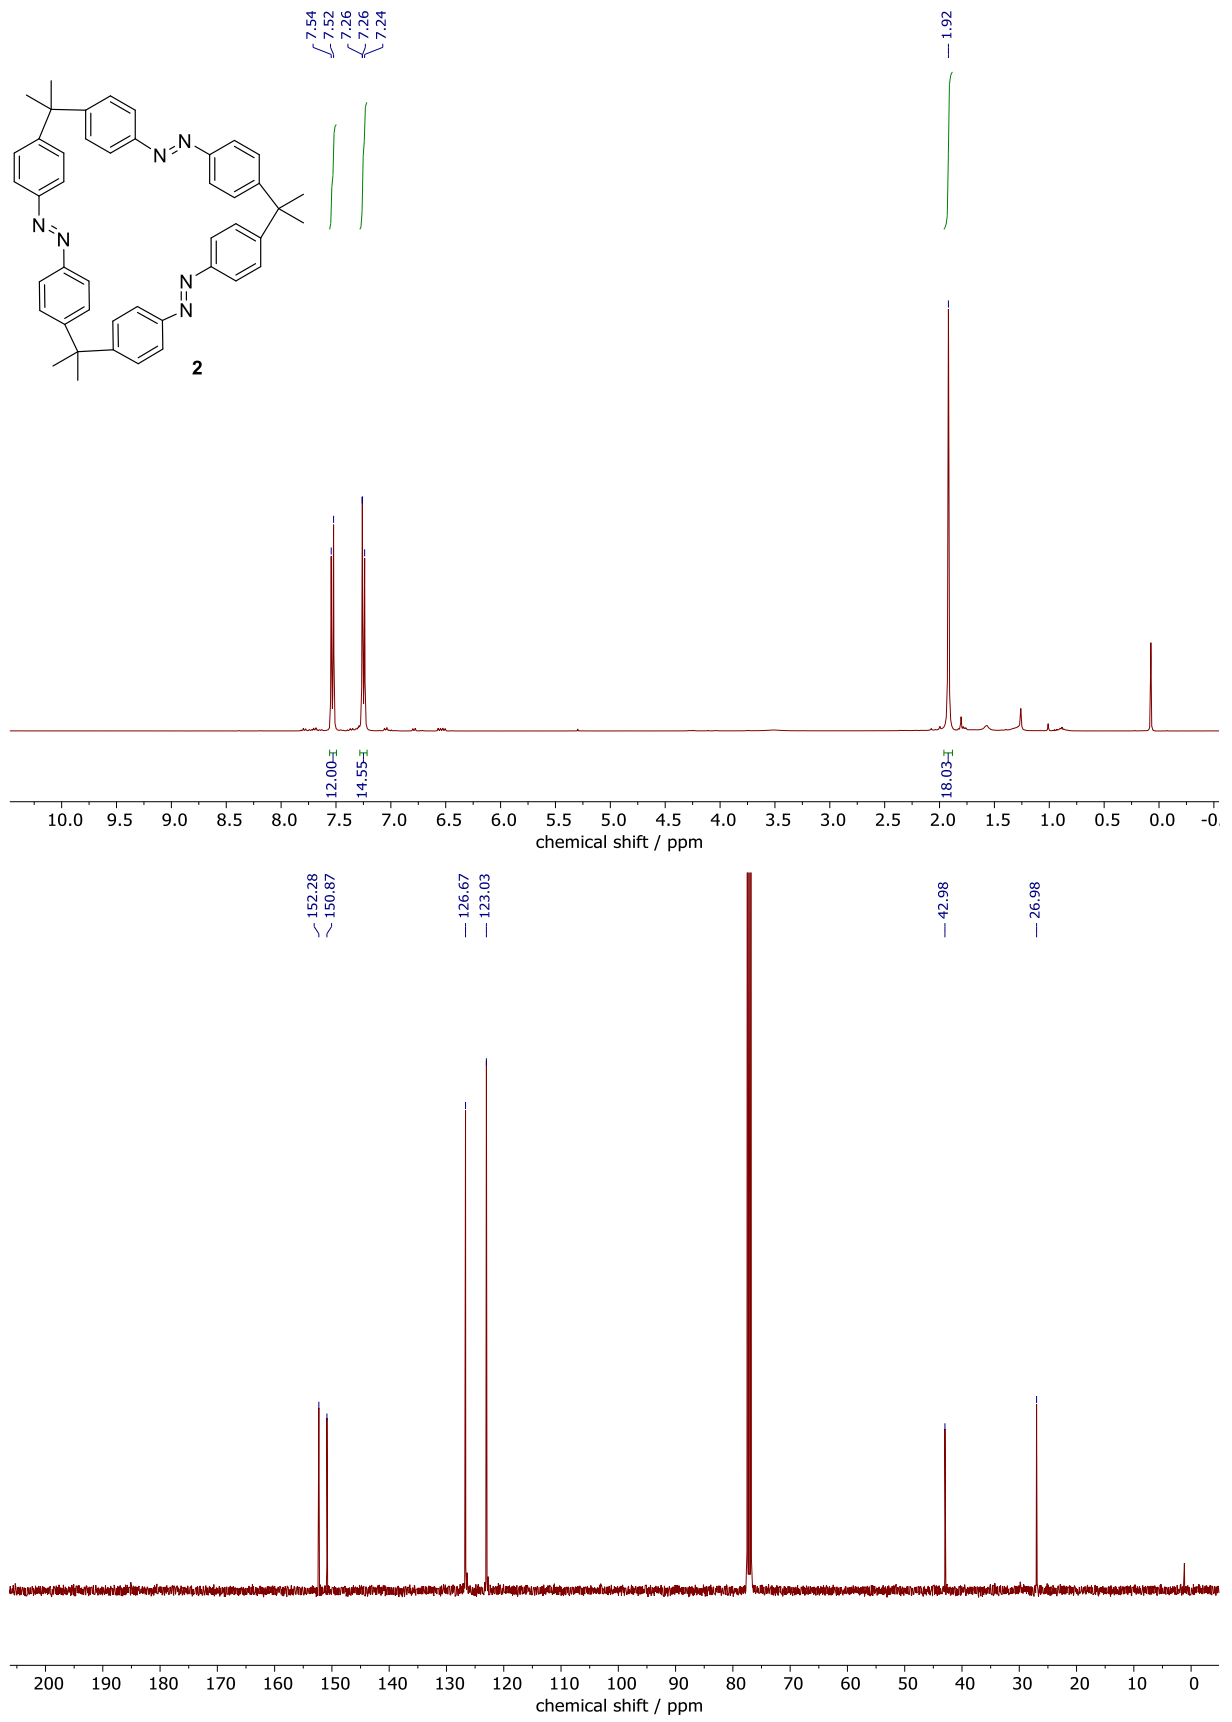

10

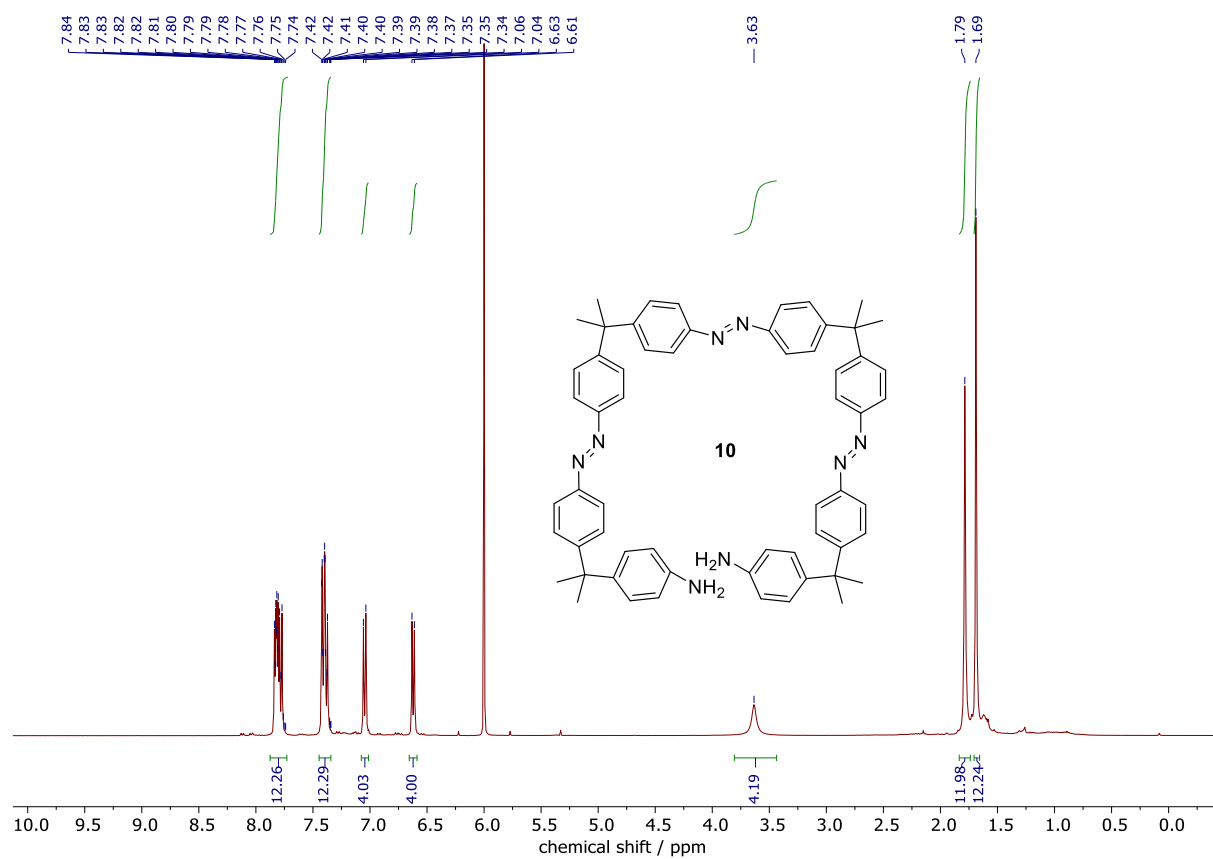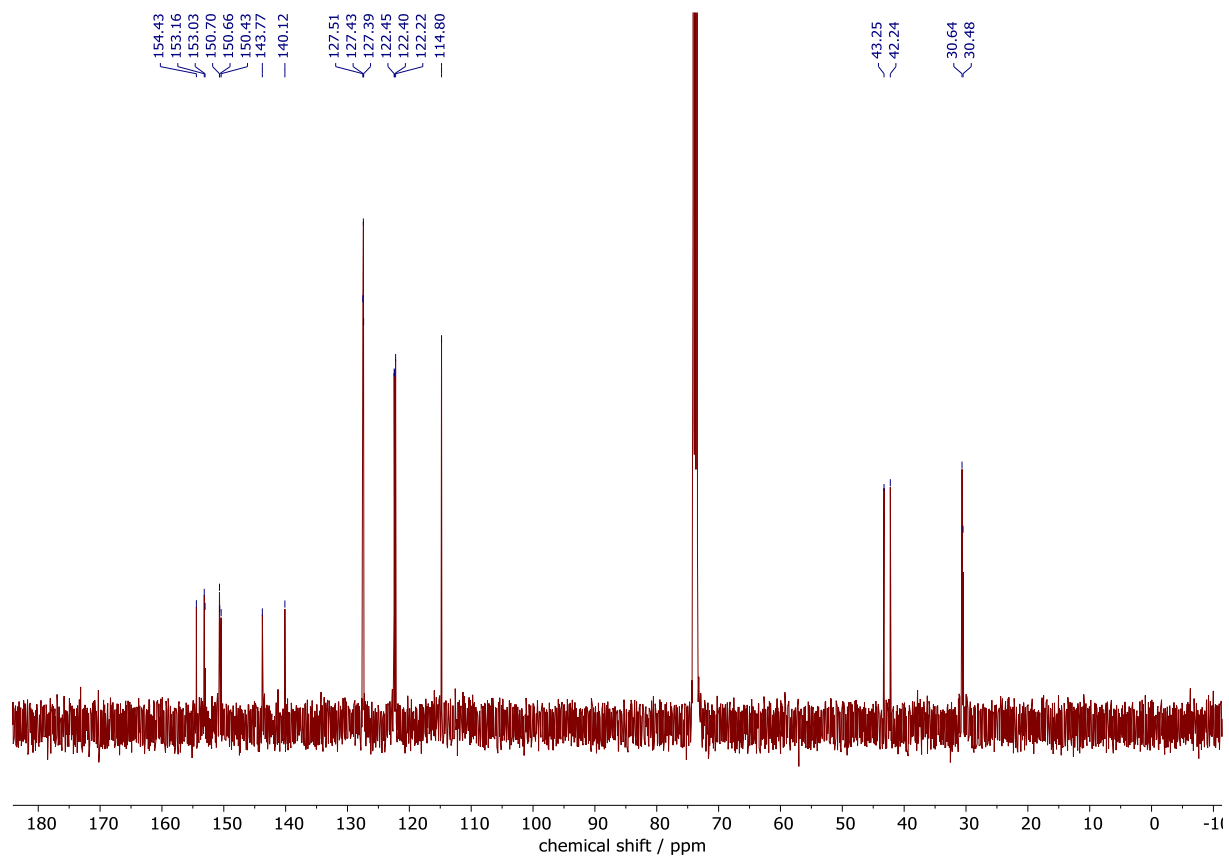

S21

3

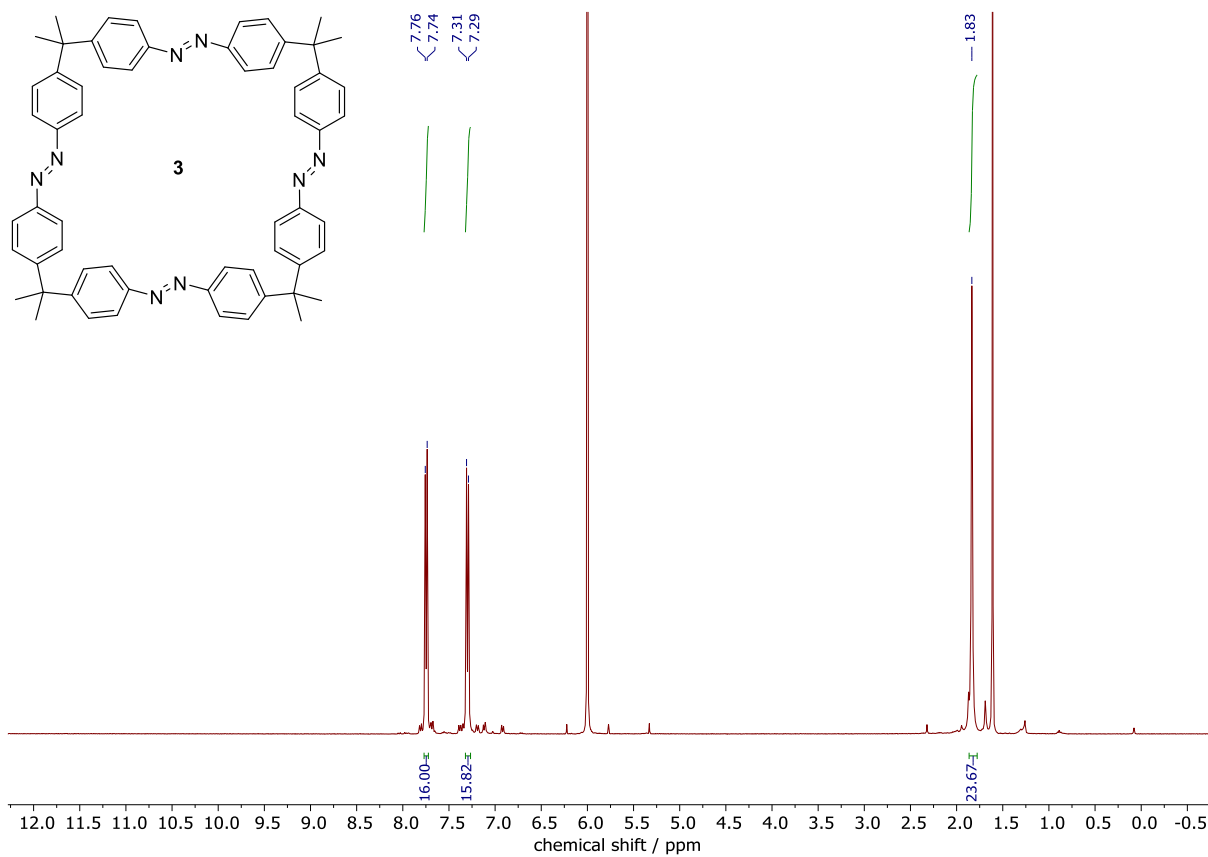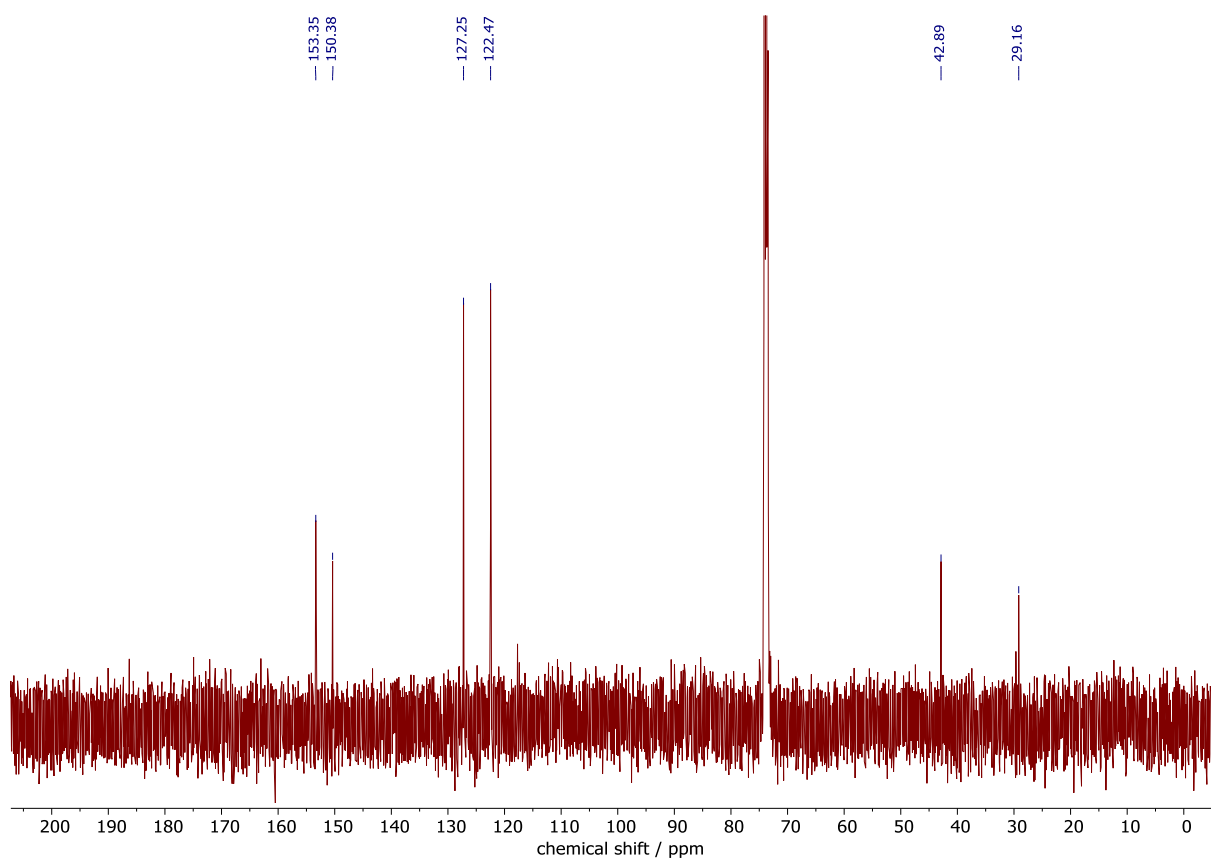

## NMR Isomerization Experiments

All thermal isomerization experiments were measured at a 600 MHz spectrometer. The samples were irradiated outside the spectrometer at 365 nm at rt (ca 1-1.5 h). The required irradiation time for reaching the PSS was determined previously. After irradiation, the NMR tube was immediately placed in the spectrometer and was equilibrated to constant temperature (~15 min) before start of the measurement. Isomerization during equilibration time was neglected due to the low overall rates.

### Tetraazo Macrocycle **3**

#### Assignment of the Isomers

Tetraazo macrocycle **3** showed complex  $^1\text{H}$  NMR spectra due to the presence of six possible isomers. The all-*E*, all-*Z* and (*E,Z,E,Z*) isomers could be assigned considering chemical shifts, integral intensities and  $^3J_{\text{H-H}}$  coupling (verified in  $^1\text{H}$ - $^1\text{H}$  COSY experiments). Then, thermal isomerizations were monitored and the rates of all signals were analyzed. The intensity of one set of signals increased and reached its maximum within the first few hours of the experiments and showed an exponential decay afterwards (Figure S4, yellow triangles). This set of six signals was assigned to the (*E,Z,Z,Z*) isomer, in consistency to its symmetry. Correlation was confirmed by  $^1\text{H}$ - $^1\text{H}$  COSY spectroscopy, however, some signals overlapped with signals of other isomers. Then, the rates of all other unassigned signals were compared. As a result, sets of signals with different rates were identified. Figure S4 shows the relative concentrations of all isomers as functions of time, where a representative signal from each data set is shown. It was still not possible to clearly assign the (*E,E,Z,Z*) and the (*E,E,E,Z*) isomers due to low signal intensities and overlap, but at least two different rates, one with quasistationary behavior, were obtained (Figure S4, blue rhombs and violet triangles). Due to the fact that computations predicted the lowest barrier for the (*E,E,E,Z*)  $\rightarrow$  all-*E* isomerization, it is likely that the (*E,E,E,Z*) isomer shows the observed quasistationary behavior in the kinetic experiments. Furthermore, the thermal formation of the (*E,E,Z,Z*) isomer is unlikely, because the (*E,Z,Z,Z*)  $\rightarrow$  (*E,Z,E,Z*) barrier was computed to be 5.5 kcal/mol lower in free energy. Thus, the photochemically generated concentrations of (*E,E,Z,Z*) should only decay and therefore not show accumulation at the beginning of the measurements.



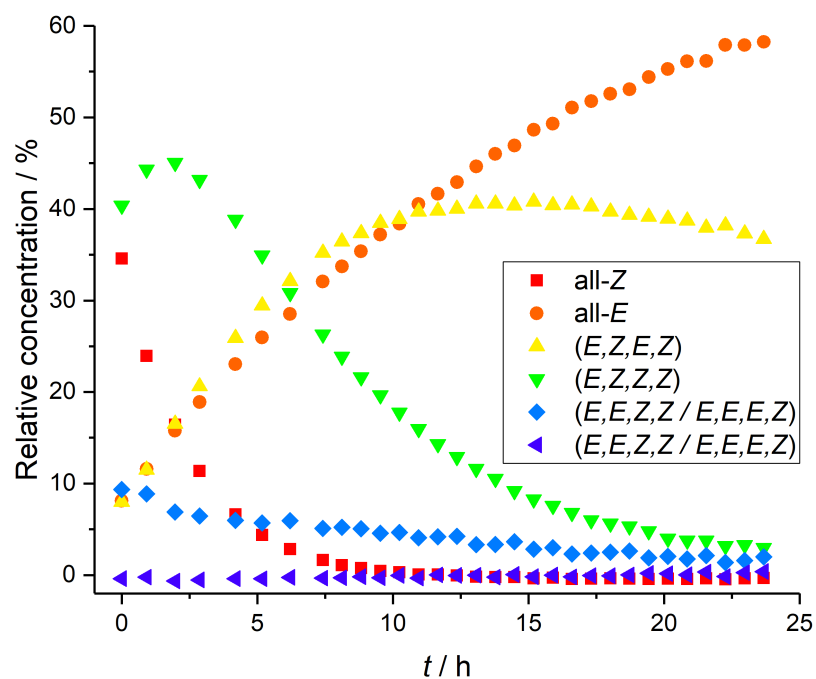

**Figure S4:** Relative concentrations of all isomers during thermal isomerization at 40 °C. Due to overlapping signals and low intensities, the (E,E,Z,Z) as well as the (E,E,E,Z) isomers could not be clearly assigned.

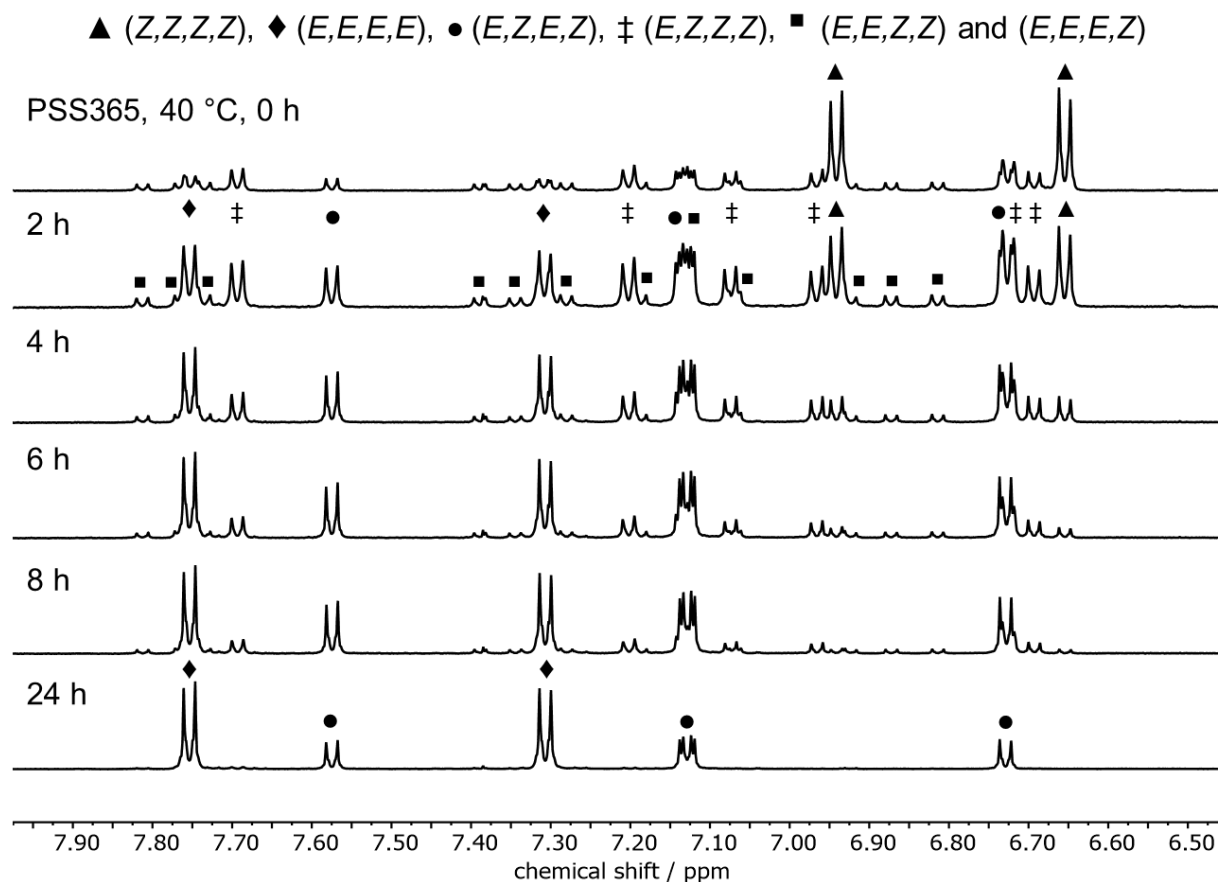

**Figure S5:** <sup>1</sup>H NMR-monitored (600 MHz) thermal isomerization of tetraazo macrocycle **3** from its PSS365 at 40 °C in 1,1,2,2-tetrachloroethane-*d*<sub>2</sub>.

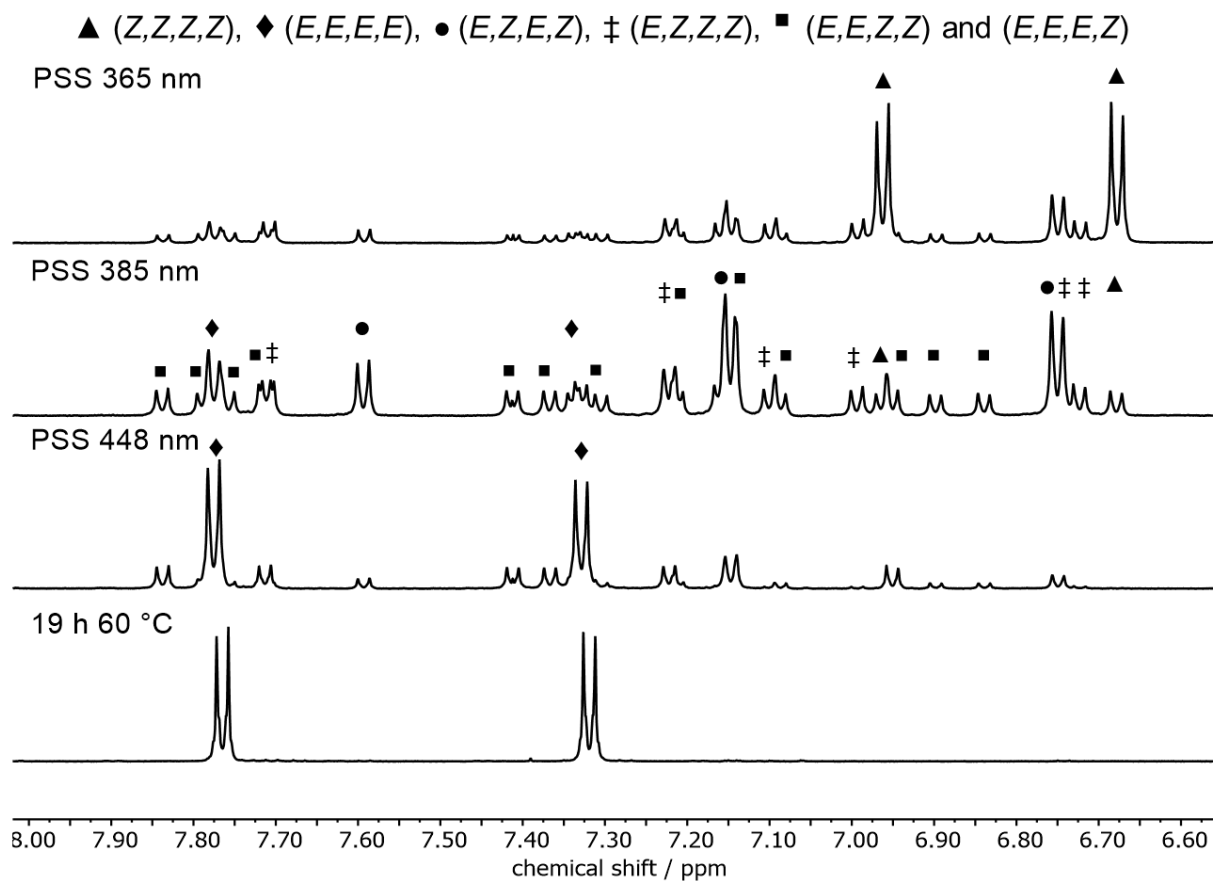

**Figure S6:**  $^1\text{H}$  NMR spectra (600 MHz) of the different photostationary states of tetraazo macrocycle **3** in 1,1,2,2-tetrachloroethane- $d_2$ .

## UV-Vis Spectroscopy

Solvents for UV-Vis spectroscopy were purchased from Merck (Uvasol<sup>®</sup> quality). 1,1,2,2-Tetrachloroethane was purchased in reagent grade (98+%) from Alfa Aesar and was freshly distilled under nitrogen before use. The measurements were carried out with a SPECORD<sup>®</sup> 200 PLUS spectrophotometer equipped with two automatic eight-fold cell changers and a Peltier element thermostat system (0.1 °C accuracy) by Analytik Jena. The system was operated with the ASpect UV software by Analytik Jena. The sample solutions were measured in QS High Precision Cells made of Quartz Suprasil<sup>®</sup> with a light path of 10 mm by Hellma Analytics.

### Photoisomerization of (Z,Z)-bisazo macrocycle 1

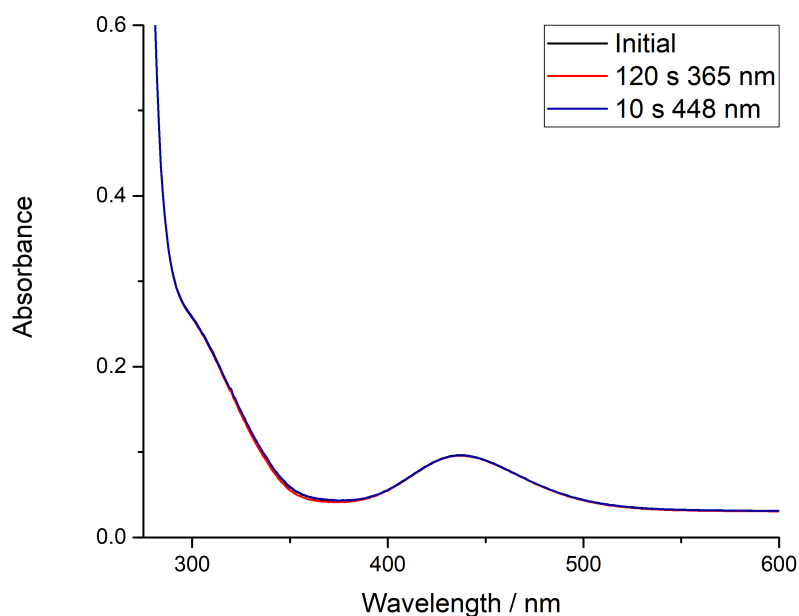

**Figure S7:** Irradiation of bisazo macrocycle 1 at 365 nm or 448 nm did not cause photoisomerization.

### Trisazo macrocycle 2 in Acetonitrile

UV-Vis spectra of trisazo macrocycle 2 in different isomerization states were recorded to identify isosbestic wavelengths for UV-Vis detection in the HPLC switching experiments. An isosbestic point at 242 nm with maximum intensity was located, which was then used for UV-Vis detection.

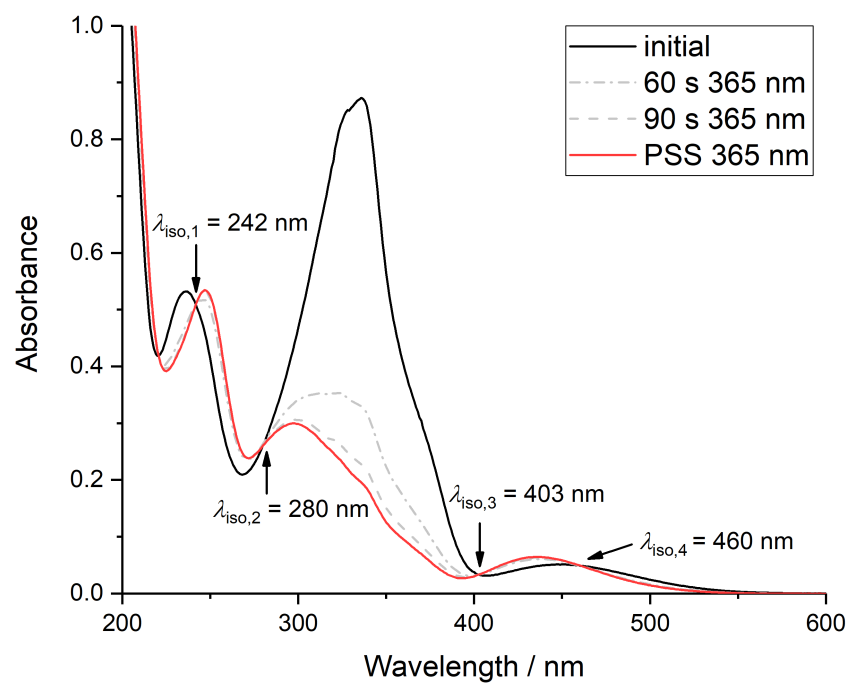

**Figure S8:** UV-Vis spectra of macrocycle **2**,  $1.4 \cdot 10^{-5}$  mol/L in acetonitrile at different isomerization states. Four isosbestic points at wavelengths 242, 280, 403 and 460 nm were identified.

## HPLC Isomerization Experiments

Relative isomer concentrations of trisazo macrocycle **2** were determined on a DIONEX UltiMate 3000 HPLC system using a Eurospher II 100-5 C18 column with acetonitrile/TBME (88:12) as isocratic eluent (0.636 column volumes/min). Detection was carried out using an UltiMate 3000 UV-Vis detector at the previously determined isosbestic wavelength of 242 nm (see UV-Vis section). Irradiation and heating of the samples was carried out in 2 mL glass vials, from which aliquots of 5  $\mu\text{L}$  ( $2.5 - 3 \cdot 10^{-3}$  mol/L in TCE- $d_2$ ) were injected into the HPLC system for analysis. Table S3 shows the detailed conditions for the selective generation of the different isomers.

**Table S2:** Isomer ratios at the different photostationary states determined by HPLC.

| Conditions    | Peak area / % |         |         |         |
|---------------|---------------|---------|---------|---------|
|               | (Z,Z,Z)       | (E,Z,Z) | (E,E,Z) | (E,E,E) |
| 10 min 365 nm | 75.66         | 12.18   | 6.94    | 5.22    |
| 10 min 448 nm | 3.96          | 21.38   | 26.21   | 48.41   |
| 10 min 385 nm | 25.23         | 46.61   | 19.36   | 8.80    |

**Table S3:** detailed applied conditions for the selective generation of the isomers. After heating for 10 min, the samples were immediately cooled to rt water.

| Isomer  | Conditions for generation                    |
|---------|----------------------------------------------|
| (Z,Z,Z) | 10 min 365 nm                                |
| (E,Z,Z) | 10 min 365 nm, then 10 min 80 °C in the dark |
| (E,E,E) | 5 min 448 nm, then 10 min 80 °C              |

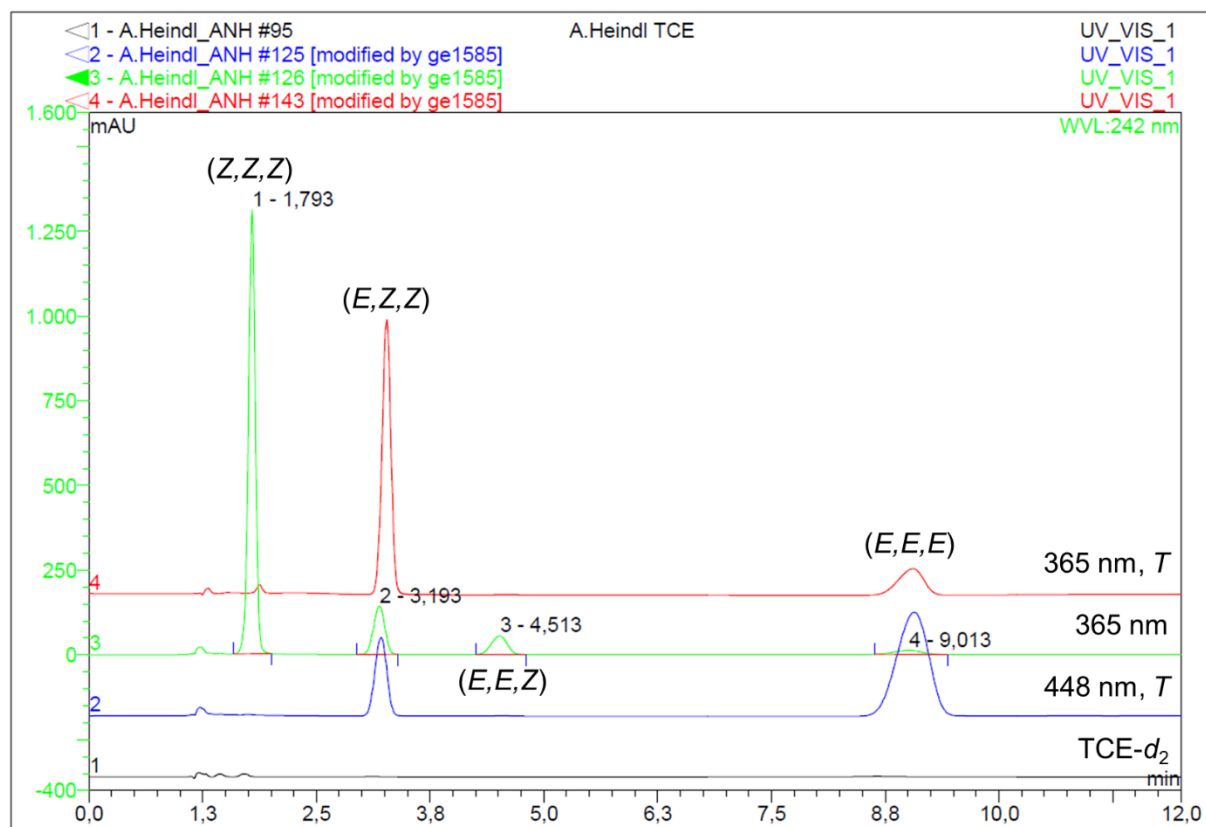

**Figure S9:** Chromatograms of the different isomer-enriched states of macrocycle **2**. Note the blank solvent chromatogram (bottom, black), which explains the origin of the impurities at ca 1.3 min.

## Computational Data

All structures were optimized at the PBE0<sup>[7]</sup> density functional theory level with D3(BJ) dispersion correction<sup>[8]</sup> using the def2-SVP<sup>[9]</sup> basis set. Solvent effects of 1,1,2,2-tetrachloroethane were approximated by using the implicit SMD model<sup>[10]</sup> for dichloromethane. Thermodynamic quantities were obtained by frequency computations at the same level of theory. The absence of imaginary frequencies in ground state and the presence of one imaginary frequency in transition state computations was checked for every optimized geometry. Single point energies were computed at the PBE0-D3(BJ)/def2-TZVPP level of theory. For all computations, the Gaussian16 program package was used.<sup>[11]</sup> Computed structures were visualized with CYLview.<sup>[12]</sup>

## Ring Strain

For the estimation of ring strain in the macrocyclic isomers, isodesmic equations in combination with the computed single point energies (PBE0-D3(BJ)/def2-TZVPP) on previously optimized structures were used.<sup>[13]</sup>

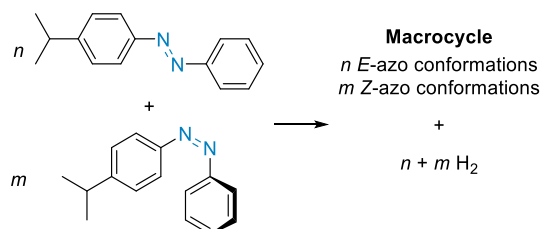

**Scheme S1:** General isodesmic equation used for estimation of ring strain.

According to Scheme S1, the ring strain energy for a macrocycle with  $n$  E-azo units and  $m$  Z-azo units is obtained according to (1):

$$\Delta E_{\text{strain}} = [E_{\text{el,macrocycle}} + (n + m) E_{\text{el,H}_2}] - [n E_{\text{el,(E)-p-}^i\text{PrAB}} + m E_{\text{el,(Z)-p-}^i\text{PrAB}}] \quad (1)$$

**Table S4:** Computed ring strain energies of bisazo macrocycle **1**.

| <b>1</b>       | $\Delta E_{\text{strain}} / \text{kcal mol}^{-1}$ | $\Delta E_{\text{strain}} \text{ per azo} / \text{kcal mol}^{-1}$ |
|----------------|---------------------------------------------------|-------------------------------------------------------------------|
| ( <i>E,E</i> ) | 40.0                                              | 20.0                                                              |
| ( <i>E,Z</i> ) | 53.8                                              | 26.9                                                              |
| ( <i>Z,Z</i> ) | 26.1                                              | 13.1                                                              |

**Table S5:** Computed ring strain energies of trisazo macrocycle **2**.

| <b>2</b>         | $\Delta E_{\text{strain}} / \text{kcal mol}^{-1}$ | $\Delta E_{\text{strain}} \text{ per azo} / \text{kcal mol}^{-1}$ |
|------------------|---------------------------------------------------|-------------------------------------------------------------------|
| ( <i>E,E,E</i> ) | 52.5                                              | 17.5                                                              |
| ( <i>E,E,Z</i> ) | 53.5                                              | 17.9                                                              |
| ( <i>E,Z,Z</i> ) | 39.2                                              | 13.1                                                              |
| ( <i>Z,Z,Z</i> ) | 40.5                                              | 13.5                                                              |

**Table S6:** Computed ring strain energies of tetraazo macrocycle **3**.

| <b>3</b>           | $\Delta E_{\text{strain}} / \text{kcal mol}^{-1}$ | $\Delta E_{\text{strain}} \text{ per azo} / \text{kcal mol}^{-1}$ |
|--------------------|---------------------------------------------------|-------------------------------------------------------------------|
| ( <i>E,E,E,E</i> ) | 58.4                                              | 14.6                                                              |
| ( <i>E,E,E,Z</i> ) | 58.3                                              | 14.6                                                              |
| ( <i>E,E,Z,Z</i> ) | 59.5                                              | 14.9                                                              |
| ( <i>E,Z,E,Z</i> ) | 53.4                                              | 13.3                                                              |
| ( <i>E,Z,Z,Z</i> ) | 45.6                                              | 11.4                                                              |
| ( <i>Z,Z,Z,Z</i> ) | 45.0                                              | 11.2                                                              |



## Thermal Isomerization Pathways of 1 and 3

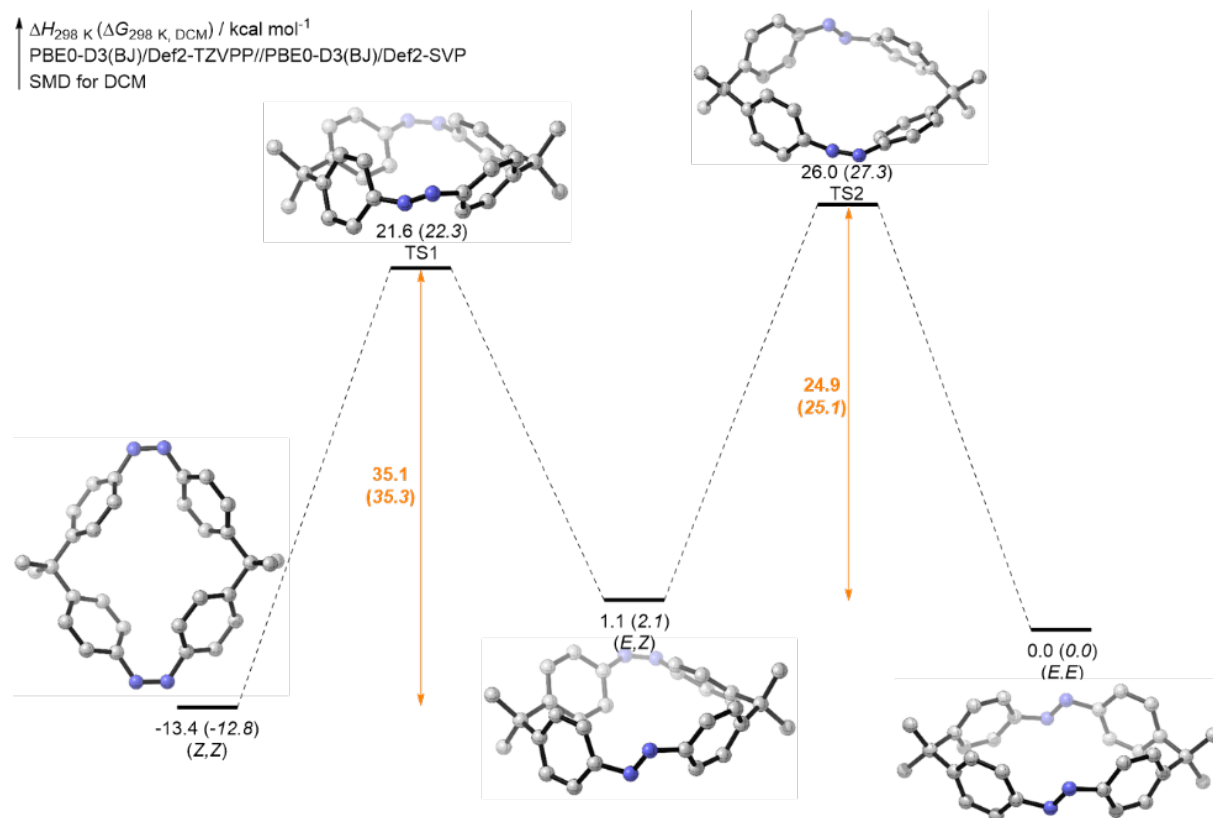

Figure S10: Thermal isomerization pathway of bisazo macrocycle 2.

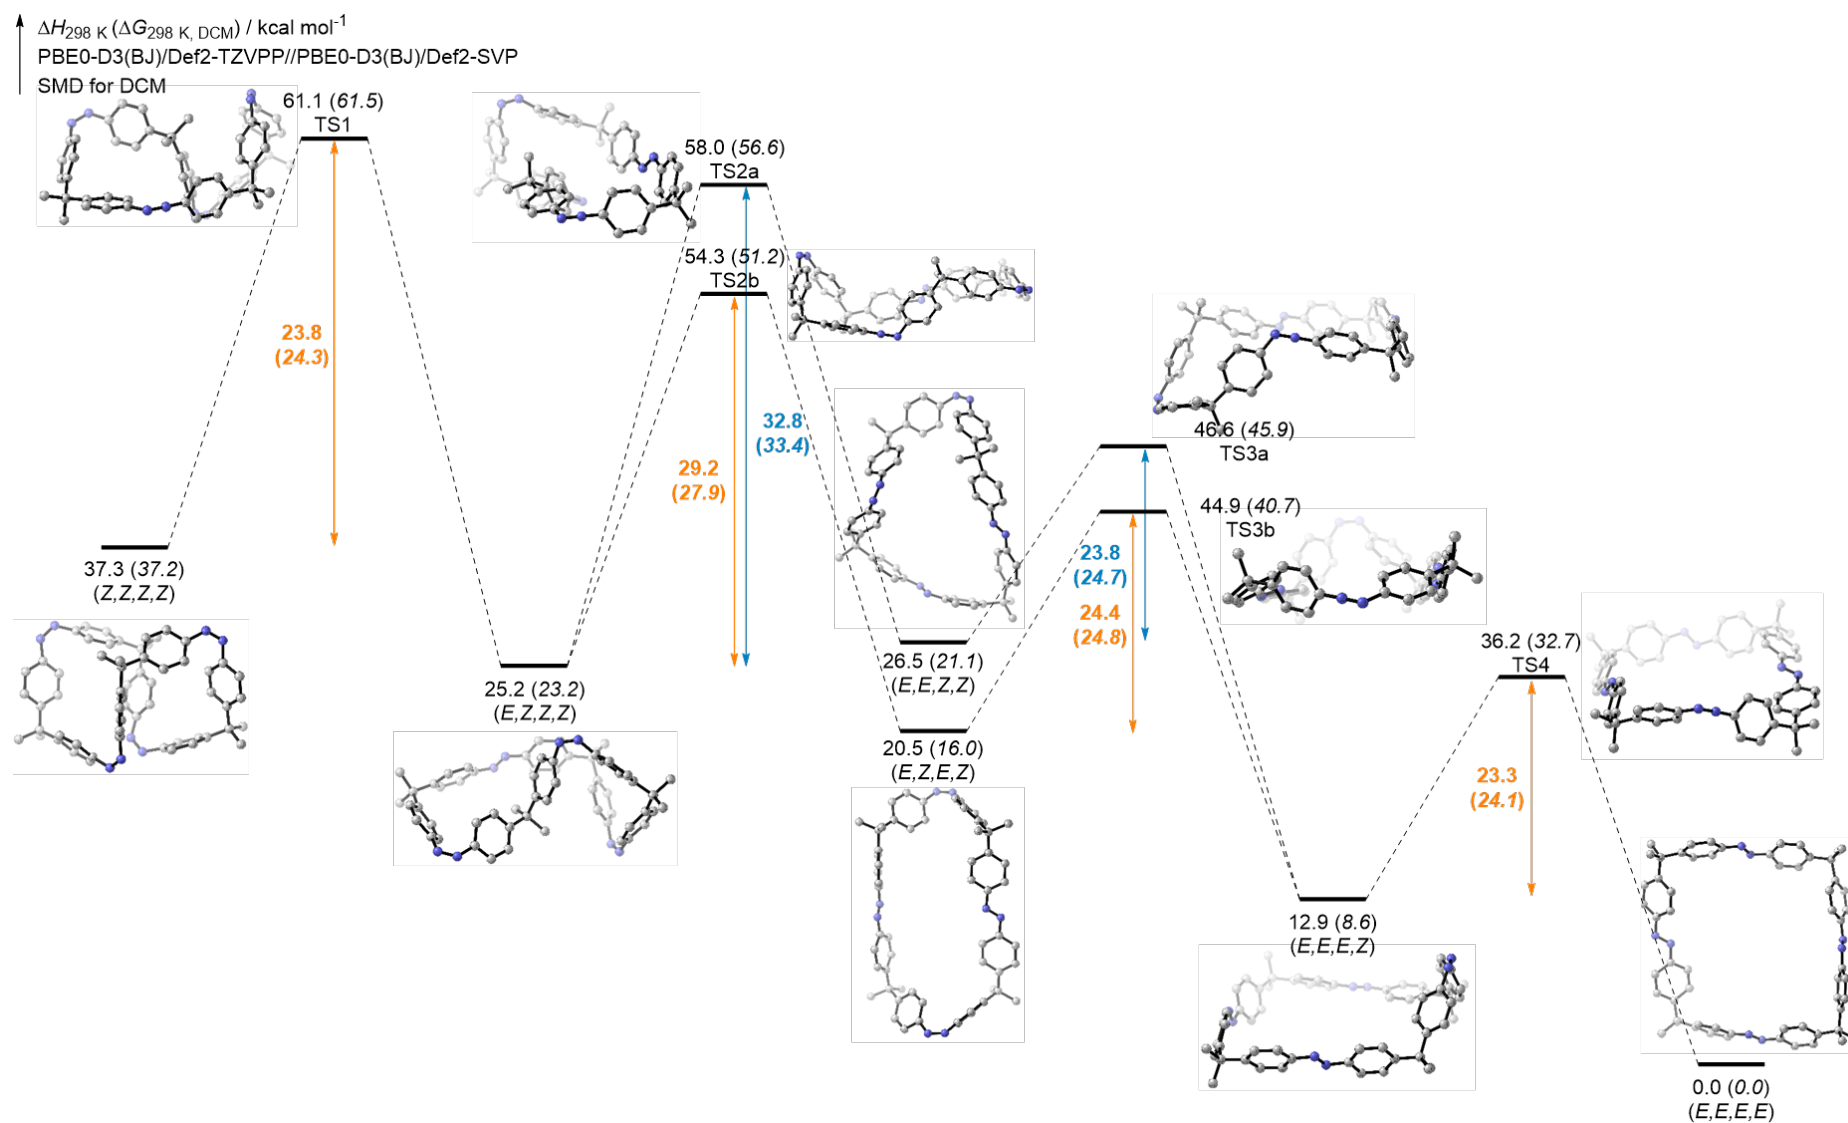

Figure S11: Thermal isomerization pathway of tetraazo macrocycle 3.

## Coordinates of Optimized Geometries

### Bisazo macrocycle 1

#### **(E,E)-1**

|   |             |             |             |
|---|-------------|-------------|-------------|
| C | -2.2083654  | 2.18383152  | 1.06960954  |
| C | -3.41591031 | 1.51878113  | 1.19667069  |
| C | -4.18879968 | 1.17518218  | 0.07241791  |
| C | -3.80125736 | 1.71464918  | -1.161194   |
| C | -2.58824675 | 2.38120574  | -1.30243023 |
| C | -1.73638643 | 2.5393001   | -0.20398808 |
| H | -1.55282364 | 2.33320779  | 1.92894192  |
| H | -3.70642884 | 1.16336773  | 2.1863891   |
| H | -4.39434126 | 1.521433    | -2.05600964 |
| H | -2.22823885 | 2.68990278  | -2.28640925 |
| C | -5.18253725 | -0.00372124 | 0.15054779  |
| C | -4.18862099 | -1.17682473 | 0.01059064  |
| C | -3.50387366 | -1.67618355 | 1.13369311  |
| C | -3.71330276 | -1.55719279 | -1.25113846 |
| C | -2.28896228 | -2.33166136 | 1.00847736  |
| H | -3.87325628 | -1.45964003 | 2.13728259  |
| C | -2.5007914  | -2.22255631 | -1.39001395 |
| H | -4.23265739 | -1.23431002 | -2.15424429 |
| C | -1.72903227 | -2.52624437 | -0.26374509 |
| H | -1.70121753 | -2.60200735 | 1.88711184  |
| H | -2.07109248 | -2.40990607 | -2.37641855 |
| N | -0.38346195 | 2.78486723  | -0.49261235 |
| N | 0.38346195  | 2.78486723  | 0.49261235  |
| C | 1.73638643  | 2.5393001   | 0.20398808  |
| C | 2.58824675  | 2.38120574  | 1.30243023  |
| C | 2.2083654   | 2.18383152  | -1.06960954 |
| C | 3.80125736  | 1.71464918  | 1.161194    |
| H | 2.22823885  | 2.68990278  | 2.28640925  |
| C | 3.41591031  | 1.51878113  | -1.19667069 |
| H | 1.55282364  | 2.33320779  | -1.92894192 |
| C | 4.18879968  | 1.17518218  | -0.07241791 |
| H | 4.39434126  | 1.521433    | 2.05600964  |
| H | 3.70642884  | 1.16336773  | -2.1863891  |
| C | 5.18253725  | -0.00372124 | -0.15054779 |
| C | 4.18862099  | -1.17682473 | -0.01059064 |
| C | 3.50387366  | -1.67618355 | -1.13369311 |
| C | 3.71330276  | -1.55719279 | 1.25113846  |
| C | 2.28896228  | -2.33166136 | -1.00847736 |
| H | 3.87325628  | -1.45964003 | -2.13728259 |
| C | 2.5007914   | -2.22255631 | 1.39001395  |
| H | 4.23265739  | -1.23431002 | 2.15424429  |
| C | 1.72903227  | -2.52624437 | 0.26374509  |

|                                          |             |             |             |             |  |
|------------------------------------------|-------------|-------------|-------------|-------------|--|
| H                                        | 1.70121753  | -2.60200735 | -1.88711184 |             |  |
| H                                        | 2.07109248  | -2.40990607 | 2.37641855  |             |  |
| N                                        | 0.36350539  | -2.75527809 | 0.50743966  |             |  |
| N                                        | -0.36350539 | -2.75527809 | -0.50743966 |             |  |
| C                                        | -6.22166648 | 0.02248054  | -0.97197416 |             |  |
| H                                        | -5.78661289 | 0.02712021  | -1.9787816  |             |  |
| H                                        | -6.87153285 | -0.86210134 | -0.90035911 |             |  |
| H                                        | -6.85081178 | 0.92040538  | -0.88154769 |             |  |
| C                                        | -5.9552019  | -0.03433763 | 1.47146539  |             |  |
| H                                        | -6.58084012 | -0.93794481 | 1.52097514  |             |  |
| H                                        | -5.31373009 | -0.03028885 | 2.36104622  |             |  |
| H                                        | -6.61335325 | 0.84441603  | 1.53942876  |             |  |
| C                                        | 6.22166648  | 0.02248054  | 0.97197416  |             |  |
| H                                        | 5.78661289  | 0.02712021  | 1.9787816   |             |  |
| H                                        | 6.87153285  | -0.86210134 | 0.90035911  |             |  |
| H                                        | 6.85081178  | 0.92040538  | 0.88154769  |             |  |
| C                                        | 5.9552019   | -0.03433763 | -1.47146539 |             |  |
| H                                        | 6.58084012  | -0.93794481 | -1.52097514 |             |  |
| H                                        | 5.31373009  | -0.03028885 | -2.36104622 |             |  |
| H                                        | 6.61335325  | 0.84441603  | -1.53942876 |             |  |
| E(el) / Hartree :                        |             |             |             | -1376.42563 |  |
| E(el) SMD-PBE0-D3(BJ)/def2-SVP / Hartree |             |             |             | -1376.46012 |  |
| E(el) PBE0-D3(BJ)/def2-TZVPP / Hartree   |             |             |             | -1377.87683 |  |
| Thermal corrections / Hartree:           |             |             |             |             |  |
| ZPVE:                                    |             | 0.512726    | E(therm.):  | 0.540761    |  |
| H(corr.):                                |             | 0.541705    | G(corr.):   | 0.456626    |  |
| Imaginary Frequencies:                   |             | 0           |             |             |  |

**(E,Z)-1**

|   |            |             |             |
|---|------------|-------------|-------------|
| C | 2.54109169 | 3.10351415  | -1.02378259 |
| C | 3.5362992  | 2.12938383  | -1.00758971 |
| C | 3.52022018 | 1.0973456   | -0.06392941 |
| C | 2.4455251  | 1.06688102  | 0.84282335  |
| C | 1.42635813 | 2.00795059  | 0.81142589  |
| C | 1.46234989 | 3.04474661  | -0.13437203 |
| H | 2.58941135 | 3.94120502  | -1.72285088 |
| H | 4.34940521 | 2.20247228  | -1.73128041 |
| H | 2.39401692 | 0.26611365  | 1.58444353  |
| H | 0.60988622 | 1.95391714  | 1.534067    |
| C | 4.6143796  | 0.0141225   | 0.02186222  |
| C | 3.84277928 | -1.30568361 | 0.01808595  |
| C | 3.08281059 | -1.6273631  | -1.12107002 |
| C | 3.65071747 | -2.07590538 | 1.17037983  |
| C | 2.03651862 | -2.52436538 | -1.05215796 |
| H | 3.23179559 | -1.06355871 | -2.04487365 |
| C | 2.58788128 | -2.97247045 | 1.25746524  |

|   |             |             |             |
|---|-------------|-------------|-------------|
| H | 4.25968975  | -1.89853634 | 2.05796498  |
| C | 1.71026246  | -3.12509413 | 0.17839667  |
| H | 1.35208171  | -2.65971205 | -1.89112025 |
| H | 2.34295757  | -3.46059472 | 2.20370355  |
| N | 0.60829647  | 4.1735494   | -0.11284446 |
| N | -0.60831546 | 4.17354673  | 0.1128483   |
| C | -1.46236411 | 3.04474032  | 0.13437492  |
| C | -1.426368   | 2.00794528  | -0.81142391 |
| C | -2.54110613 | 3.10350251  | 1.02378558  |
| C | -2.44553098 | 1.06687142  | -0.84282216 |
| H | -0.60989589 | 1.95391592  | -1.53406509 |
| C | -3.53630952 | 2.129368    | 1.00759188  |
| H | -2.58942931 | 3.94119256  | 1.7228546   |
| C | -3.52022617 | 1.09733065  | 0.06393067  |
| H | -2.39401944 | 0.26610491  | -1.58444304 |
| H | -4.34941581 | 2.20245237  | 1.73128266  |
| C | -4.61438099 | 0.01410299  | -0.02186186 |
| C | -3.84277507 | -1.30569985 | -0.01808669 |
| C | -3.08280501 | -1.62737708 | 1.121069    |
| C | -3.65071001 | -2.07591985 | -1.17038121 |
| C | -2.03650924 | -2.52437487 | 1.05215618  |
| H | -3.23179239 | -1.06357409 | 2.0448731   |
| C | -2.58787002 | -2.97248034 | -1.25746739 |
| H | -4.25968305 | -1.89855264 | -2.05796622 |
| C | -1.71025054 | -3.1251012  | -0.17839896 |
| H | -1.35207175 | -2.65971934 | 1.89111836  |
| H | -2.34294425 | -3.46060278 | -2.20370611 |
| N | -0.39664236 | -3.50582845 | -0.4830243  |
| N | 0.39665589  | -3.5058272  | 0.4830217   |
| C | 5.59431436  | 0.06939535  | -1.15335184 |
| H | 6.31765931  | -0.75462241 | -1.06819734 |
| H | 5.09398126  | -0.02290303 | -2.12729412 |
| H | 6.15935565  | 1.01339271  | -1.15217336 |
| C | 5.41145968  | 0.23031475  | 1.31350641  |
| H | 4.76504885  | 0.25072806  | 2.20185286  |
| H | 6.1653195   | -0.56100583 | 1.44899034  |
| H | 5.93360222  | 1.19697785  | 1.26686219  |
| C | -5.411462   | 0.23029294  | -1.31350585 |
| H | -4.76505127 | 0.25070973  | -2.2018523  |
| H | -6.16531846 | -0.56103073 | -1.44899044 |
| H | -5.93360864 | 1.19695378  | -1.26686082 |
| C | -5.59431597 | 0.0693707   | 1.15335227  |
| H | -6.31765744 | -0.75465005 | 1.06819708  |
| H | -5.09398247 | -0.02292638 | 2.12729446  |
| H | -6.15936125 | 1.01336567  | 1.15217459  |

E(el) / Hartree :

-1376.42331

|                                          |             |            |          |
|------------------------------------------|-------------|------------|----------|
| E(el) SMD-PBE0-D3(BJ)/def2-SVP / Hartree | -1376.45701 |            |          |
| E(el) PBE0-D3(BJ)/def2-TZVPP / Hartree   | -1377.87491 |            |          |
| Thermal corrections / Hartree            |             |            |          |
| ZPVE:                                    | 0.512912    | E(therm.): | 0.540659 |
| H(corr.):                                | 0.541603    | G(corr.):  | 0.457309 |
| Imaginary frequencies:                   | 0           |            |          |

**(Z,Z)-1**

|   |             |             |             |
|---|-------------|-------------|-------------|
| C | 1.26356765  | 2.47814851  | -0.93497835 |
| C | 2.11580758  | 1.38587809  | -0.92737911 |
| C | 3.11701836  | 1.23747438  | 0.04603502  |
| C | 3.25915187  | 2.25349538  | 0.99461616  |
| C | 2.42861835  | 3.37253286  | 0.98013623  |
| C | 1.39909057  | 3.47322781  | 0.04436657  |
| H | 0.48533326  | 2.56307657  | -1.69509186 |
| H | 1.98679619  | 0.60724073  | -1.68374074 |
| H | 4.03442675  | 2.18871125  | 1.75911615  |
| H | 2.5556137   | 4.17655689  | 1.70816639  |
| C | 4.01573293  | -4.125E-06  | -1.5233E-06 |
| C | 3.117016    | -1.23748096 | -0.04603692 |
| C | 3.25914643  | -2.25350223 | -0.99461822 |
| C | 2.11580617  | -1.38588279 | 0.92737847  |
| C | 2.42861085  | -3.37253818 | -0.98013722 |
| H | 4.03442046  | -2.18871956 | -1.7591192  |
| C | 1.26356422  | -2.47815163 | 0.93497881  |
| H | 1.98679718  | -0.60724519 | 1.68374026  |
| C | 1.39908407  | -3.4732312  | -0.04436626 |
| H | 2.5556038   | -4.17656246 | -1.70816753 |
| H | 0.48533063  | -2.56307823 | 1.69509329  |
| N | 0.61648102  | 4.65684642  | 0.0604187   |
| N | -0.61647261 | 4.6568474   | -0.0604281  |
| C | -1.39908434 | 3.47323027  | -0.04437311 |
| C | -2.42861229 | 3.37253495  | -0.98014255 |
| C | -1.26356327 | 2.47815309  | 0.93497423  |
| C | -3.2591479  | 2.25349898  | -0.99461977 |
| H | -2.55560614 | 4.17655745  | -1.70817467 |
| C | -2.11580524 | 1.38588424  | 0.92737762  |
| H | -0.48532873 | 2.56308156  | 1.69508753  |
| C | -3.11701629 | 1.23748003  | -0.04603615 |
| H | -4.03442289 | 2.18871443  | -1.75911961 |
| H | -1.9867953  | 0.60724848  | 1.68374115  |
| C | -4.01573317 | 3.3163E-06  | 3.4255E-06  |
| C | -3.11701854 | -1.23747507 | 0.04604195  |
| C | -3.25915087 | -2.25349372 | 0.99462579  |
| C | -2.11580895 | -1.38588118 | -0.92737305 |
| C | -2.42861735 | -3.37253123 | 0.9801476   |

|                                          |             |             |             |             |  |
|------------------------------------------|-------------|-------------|-------------|-------------|--|
| H                                        | -4.0344248  | -2.1887077  | 1.75912658  |             |  |
| C                                        | -1.26356902 | -2.47815161 | -0.93497063 |             |  |
| H                                        | -1.9867985  | -0.6072457  | -1.68373677 |             |  |
| C                                        | -1.39909073 | -3.47322849 | 0.04437691  |             |  |
| H                                        | -2.5556118  | -4.17655346 | 1.70817991  |             |  |
| H                                        | -0.48533556 | -2.56308155 | -1.69508488 |             |  |
| N                                        | 0.61647231  | -4.65684837 | -0.06041735 |             |  |
| N                                        | -0.61648117 | -4.65684707 | 0.060431    |             |  |
| C                                        | 4.91724798  | 0.11608485  | -1.23632668 |             |  |
| H                                        | 5.62655908  | -0.72358018 | -1.29468425 |             |  |
| H                                        | 4.33487998  | 0.14403247  | -2.16862238 |             |  |
| H                                        | 5.50105282  | 1.0462294   | -1.17971921 |             |  |
| C                                        | 4.91724934  | -0.11609477 | 1.23632249  |             |  |
| H                                        | 5.62656206  | 0.72356895  | 1.29467915  |             |  |
| H                                        | 4.33488247  | -0.14404132 | 2.16861892  |             |  |
| H                                        | 5.50105239  | -1.0462404  | 1.17971427  |             |  |
| C                                        | -4.91724973 | -0.11608872 | -1.23632034 |             |  |
| H                                        | -5.50105455 | -1.04623309 | -1.17970982 |             |  |
| H                                        | -5.62656086 | 0.7235762   | -1.29467914 |             |  |
| H                                        | -4.33488286 | -0.1440387  | -2.16861667 |             |  |
| C                                        | -4.91724805 | 0.11609704  | 1.23632826  |             |  |
| H                                        | -5.50105121 | 1.0462425   | 1.17971842  |             |  |
| H                                        | -5.62656068 | -0.72356656 | 1.29468791  |             |  |
| H                                        | -4.33488004 | 0.14404595  | 2.1686239   |             |  |
| E(el) / Hartree :                        |             |             |             | -1376.44679 |  |
| E(el) SMD-PBE0-D3(BJ)/def2-SVP / Hartree |             |             |             | -1376.48124 |  |
| E(el) PBE0-D3(BJ)/def2-TZVPP / Hartree   |             |             |             | -1377.89887 |  |
| Thermal corrections / Hartree            |             |             |             |             |  |
| ZPVE:                                    |             | 0.513817    | E(therm.):  | 0.541388    |  |
| H(corr.):                                |             | 0.542332    | G(corr.):   | 0.458285    |  |
| Imaginary frequencies:                   |             | 0           |             |             |  |

### TS (*E,Z*) → (*E,E*)

|   |             |             |             |
|---|-------------|-------------|-------------|
| C | -2.36223575 | 2.69409987  | 1.18303304  |
| C | -3.51356969 | 1.91219962  | 1.18502878  |
| C | -3.941306   | 1.18875286  | 0.0660529   |
| C | -3.18752987 | 1.36337659  | -1.10612911 |
| C | -2.04717808 | 2.13972901  | -1.16157639 |
| C | -1.56089579 | 2.77086734  | 0.01821423  |
| H | -2.04802744 | 3.21741125  | 2.08724667  |
| H | -4.07101042 | 1.84933916  | 2.12211758  |
| H | -3.47128102 | 0.83243758  | -2.01783578 |
| H | -1.47138979 | 2.22355732  | -2.08413494 |
| C | -4.99379045 | 0.06581476  | 0.12725011  |
| C | -4.10151072 | -1.18167664 | 0.03884215  |
| C | -3.27222085 | -1.50502587 | 1.12949464  |

|   |             |             |             |
|---|-------------|-------------|-------------|
| C | -3.85881593 | -1.84099965 | -1.17397642 |
| C | -2.14210773 | -2.28133789 | 0.96921312  |
| H | -3.44723815 | -1.03570762 | 2.09936903  |
| C | -2.70869602 | -2.60434873 | -1.35500975 |
| H | -4.51293089 | -1.67000035 | -2.03034761 |
| C | -1.79429965 | -2.76083938 | -0.30716652 |
| H | -1.43170215 | -2.42193703 | 1.78542239  |
| H | -2.44812615 | -3.00176554 | -2.33884408 |
| N | -0.36416412 | 3.33546098  | -0.01643334 |
| N | 0.72263065  | 3.78432306  | -0.33581469 |
| C | 1.83317275  | 2.91775883  | -0.07221391 |
| C | 1.77471038  | 1.88286384  | 0.86856666  |
| C | 2.97211971  | 3.08086158  | -0.85655343 |
| C | 2.81986774  | 0.98367023  | 0.95536188  |
| H | 0.89013088  | 1.78062795  | 1.50130932  |
| C | 4.0011856   | 2.13763914  | -0.79161639 |
| H | 3.00892518  | 3.91392984  | -1.56210881 |
| C | 3.92781117  | 1.05336045  | 0.08768176  |
| H | 2.74483314  | 0.15634444  | 1.66395387  |
| H | 4.85236427  | 2.24262266  | -1.46599301 |
| C | 4.93053158  | -0.1179849  | 0.08956546  |
| C | 4.01855232  | -1.34604901 | -0.02855595 |
| C | 3.19966279  | -1.45408811 | -1.16726877 |
| C | 3.74270134  | -2.1891823  | 1.05368556  |
| C | 2.03982049  | -2.20474824 | -1.14813595 |
| H | 3.40342875  | -0.82691674 | -2.03873387 |
| C | 2.56964712  | -2.94089113 | 1.08922594  |
| H | 4.38369397  | -2.17866802 | 1.93670031  |
| C | 1.65956911  | -2.87557363 | 0.02838466  |
| H | 1.3300639   | -2.17329706 | -1.97656709 |
| H | 2.28232632  | -3.48866685 | 1.98977271  |
| N | 0.32044866  | -3.17870999 | 0.31414545  |
| N | -0.47366851 | -3.08031007 | -0.64610677 |
| C | -5.80779954 | 0.08965897  | 1.42218308  |
| H | -6.53862443 | -0.73263681 | 1.41957975  |
| H | -5.19259459 | -0.01999735 | 2.32480974  |
| H | -6.35886342 | 1.03828159  | 1.50851334  |
| C | -5.98423939 | 0.17171523  | -1.03518586 |
| H | -5.49253113 | 0.24752081  | -2.01395701 |
| H | -6.65428066 | -0.70185587 | -1.05968509 |
| H | -6.59951496 | 1.07481505  | -0.91171752 |
| C | 5.91707173  | -0.05349449 | -1.07810543 |
| H | 6.55955564  | 0.83707601  | -1.00650711 |
| H | 6.56836067  | -0.93933437 | -1.05797937 |
| H | 5.41324344  | -0.03069501 | -2.05444639 |
| C | 5.72853158  | -0.0920861  | 1.39720298  |
| H | 5.07708099  | -0.08274636 | 2.28216768  |



|                                          |            |             |            |             |          |
|------------------------------------------|------------|-------------|------------|-------------|----------|
| H                                        | 6.39624334 | -0.96467774 | 1.4675226  |             |          |
| H                                        | 6.34782204 | 0.81596681  | 1.43473598 |             |          |
| E(el) / Hartree :                        |            |             |            | -1376.38504 |          |
| E(el) SMD-PBE0-D3(BJ)/def2-SVP / Hartree |            |             |            | -1376.4188  |          |
| E(el) PBE0-D3(BJ)/def2-TZVPP / Hartree   |            |             |            | -1377.83344 |          |
| Thermal corrections / Hartree            |            |             |            |             |          |
| ZPVE:                                    |            |             | 0.511181   | E(therm.):  | 0.538826 |
| H(corr.):                                |            |             | 0.53977    | G(corr.):   | 0.455947 |
| Imaginary frequencies:                   |            |             | 1          |             |          |

### TS (*Z,Z*) → (*E,Z*)

|   |             |             |             |
|---|-------------|-------------|-------------|
| C | 2.46421514  | 3.24204033  | -0.89021132 |
| C | 3.39687786  | 2.2084617   | -0.94019978 |
| C | 3.35563241  | 1.15453766  | -0.02317244 |
| C | 2.33405378  | 1.17054718  | 0.94151376  |
| C | 1.37737616  | 2.17425975  | 0.97983478  |
| C | 1.42746414  | 3.22120869  | 0.04661301  |
| H | 2.52543613  | 4.08533913  | -1.58136261 |
| H | 4.1763623   | 2.24631189  | -1.70254281 |
| H | 2.27267061  | 0.35749984  | 1.66996112  |
| H | 0.59062781  | 2.15608947  | 1.73640565  |
| C | 4.37073276  | 0.00277614  | -0.01914209 |
| C | 3.55848643  | -1.29198938 | 0.00147731  |
| C | 2.55485469  | -1.45131243 | -0.97260349 |
| C | 3.70383414  | -2.28752991 | 0.97077139  |
| C | 1.64962084  | -2.48911466 | -0.90275429 |
| H | 2.44518739  | -0.69564493 | -1.75427528 |
| C | 2.81116678  | -3.360503   | 1.03592143  |
| H | 4.48869913  | -2.21073814 | 1.72430512  |
| C | 1.74372033  | -3.418025   | 0.14406283  |
| H | 0.8232959   | -2.5687258  | -1.6121828  |
| H | 2.87260096  | -4.10529804 | 1.83260447  |
| N | 0.60382716  | 4.3708574   | 0.12134538  |
| N | -0.62438612 | 4.36662809  | 0.27815216  |
| C | -1.45784586 | 3.22530884  | 0.18523755  |
| C | -1.31596229 | 2.20262009  | -0.76742316 |
| C | -2.59365535 | 3.23330707  | 0.9997076   |
| C | -2.27820624 | 1.2094334   | -0.85860813 |
| H | -0.45778284 | 2.19492314  | -1.44124014 |
| C | -3.5373777  | 2.21191785  | 0.91832871  |
| H | -2.7205192  | 4.0623147   | 1.69928326  |
| C | -3.4034034  | 1.17992489  | -0.01506687 |
| H | -2.1439162  | 0.40937453  | -1.59091736 |
| H | -4.39858339 | 2.24085209  | 1.58721425  |
| C | -4.41092363 | 0.02839654  | -0.15620017 |
| C | -3.58753726 | -1.25619154 | -0.0662819  |

|                                          |             |             |             |             |  |
|------------------------------------------|-------------|-------------|-------------|-------------|--|
| C                                        | -2.85242879 | -1.50676719 | 1.10186218  |             |  |
| C                                        | -3.37934394 | -2.13034431 | -1.13930375 |             |  |
| C                                        | -1.89517341 | -2.49855216 | 1.18018343  |             |  |
| H                                        | -2.99808004 | -0.86857616 | 1.97799365  |             |  |
| C                                        | -2.39670891 | -3.11379775 | -1.12138243 |             |  |
| H                                        | -3.96302163 | -2.01924534 | -2.05532514 |             |  |
| C                                        | -1.56585043 | -3.24921454 | 0.01462068  |             |  |
| H                                        | -1.29970683 | -2.63965089 | 2.08333726  |             |  |
| H                                        | -2.21539456 | -3.73414248 | -2.00047103 |             |  |
| N                                        | -0.40346678 | -3.88365446 | 0.01619699  |             |  |
| N                                        | 0.65223999  | -4.27508872 | 0.49625715  |             |  |
| C                                        | 5.26413318  | 0.00079049  | -1.26578799 |             |  |
| H                                        | 5.93186193  | -0.87269984 | -1.24038187 |             |  |
| H                                        | 4.67842463  | -0.05150132 | -2.19483717 |             |  |
| H                                        | 5.89286208  | 0.90299263  | -1.30495958 |             |  |
| C                                        | 5.26782396  | 0.15268211  | 1.2151106   |             |  |
| H                                        | 4.68845818  | 0.12311236  | 2.14912745  |             |  |
| H                                        | 6.0323772   | -0.63871703 | 1.25356662  |             |  |
| H                                        | 5.78673645  | 1.12129705  | 1.17657791  |             |  |
| C                                        | -5.12143609 | 0.17384996  | -1.50730144 |             |  |
| H                                        | -4.41378405 | 0.18737307  | -2.34833698 |             |  |
| H                                        | -5.83283734 | -0.65130418 | -1.66717049 |             |  |
| H                                        | -5.68311833 | 1.1192057   | -1.5328076  |             |  |
| C                                        | -5.48004738 | 0.04771107  | 0.94092868  |             |  |
| H                                        | -6.14878122 | -0.81575842 | 0.81312085  |             |  |
| H                                        | -5.04565572 | -0.01498436 | 1.94888844  |             |  |
| H                                        | -6.09315356 | 0.96075953  | 0.89045268  |             |  |
| E(el) / Hartree :                        |             |             |             | -1376.39151 |  |
| E(el) SMD-PBE0-D3(BJ)/def2-SVP / Hartree |             |             |             | -1377.84062 |  |
| E(el) PBE0-D3(BJ)/def2-TZVPP / Hartree   |             |             |             | -1376.39151 |  |
| Thermal corrections / Hartree            |             |             |             |             |  |
| ZPVE:                                    |             | 0.511414    | E(therm.):  | 0.538985    |  |
| H(corr.):                                |             | 0.53993     | G(corr.):   | 0.455767    |  |
| Imaginary frequencies:                   |             | 1           |             |             |  |

## Trisazo macrocycle 2

### **(E,E,E)**

|   |             |             |             |
|---|-------------|-------------|-------------|
| C | -3.99095923 | -2.8836305  | -0.28260132 |
| C | -2.66348193 | -5.36383536 | -0.08878481 |
| C | -1.74107349 | -6.58776013 | -6.0062E-05 |
| C | 2.04437298  | -4.47748591 | 0.28320207  |
| C | -0.33491111 | -5.97831493 | 0.08924623  |
| N | -4.48612448 | -1.58994612 | -0.51168224 |
| N | 3.11464911  | -3.59802154 | 0.51215332  |
| N | -4.67616354 | -0.89960102 | 0.50938004  |
| C | -0.50103012 | 4.89896056  | -0.28129365 |

|   |             |             |             |
|---|-------------|-------------|-------------|
| C | -3.31269141 | 4.98850466  | -0.08748036 |
| C | -4.8337373  | 4.80102856  | 0.00090987  |
| C | -4.90133507 | 0.46729646  | 0.28073892  |
| C | -5.0090881  | 3.27844684  | 0.08889414  |
| N | 0.86702117  | 4.68171262  | -0.51061947 |
| N | 1.5595412   | 4.49858361  | 0.51023336  |
| N | 3.61979631  | -3.0907149  | -0.50899821 |
| C | 4.4920014   | -2.0144241  | -0.28052806 |
| C | 5.97614389  | 0.37546726  | -0.08868879 |
| C | 6.57533701  | 1.78613981  | -0.00110185 |
| C | 2.85610077  | 4.01105128  | 0.28102575  |
| C | 5.34488183  | 2.69983107  | 0.08748828  |
| C | 4.5115042   | -1.28788709 | 0.92086927  |
| H | 3.89706183  | -1.64041927 | 1.75062743  |
| C | 5.23386353  | -0.11183073 | 1.00230437  |
| H | 5.17058773  | 0.48150742  | 1.91726784  |
| C | 6.009609    | -0.3973524  | -1.25403598 |
| H | 6.58538156  | -0.06412503 | -2.11854402 |
| C | 5.26242127  | -1.56907551 | -1.35723181 |
| H | 5.23499419  | -2.14199886 | -2.28668263 |
| C | 4.98378228  | 3.38349637  | 1.2530604   |
| H | 5.64969164  | 3.38747292  | 2.11704559  |
| C | 3.74664197  | 4.01634553  | 1.35715429  |
| H | 3.43389392  | 4.49674609  | 2.28681688  |
| C | 4.45724713  | 2.74461031  | -1.00282658 |
| H | 4.70220665  | 2.20054857  | -1.91784326 |
| C | 3.23946447  | 3.39407199  | -0.9206353  |
| H | 2.53057559  | 3.38753601  | -1.7499369  |
| C | -1.27281318 | 5.34303998  | -1.35753738 |
| H | -0.76369802 | 5.60568863  | -2.28742724 |
| C | -2.66108847 | 5.40391402  | -1.25332654 |
| H | -3.23830559 | 5.73561978  | -2.11744894 |
| C | -2.51867182 | 4.58993029  | 1.00308577  |
| H | -3.00010527 | 4.23861129  | 1.91853261  |
| C | -1.13902458 | 4.55284387  | 0.92068094  |
| H | -0.52580298 | 4.19741608  | 1.75010277  |
| C | -4.55502081 | 1.10863478  | -0.91941531 |
| H | -4.1925402  | 0.4985062   | -1.74806117 |
| C | -4.60104146 | 2.48804991  | -1.00077104 |
| H | -4.24952239 | 2.97278537  | -1.91439168 |
| C | -5.42381115 | 2.62317456  | 1.25288095  |
| H | -5.76241455 | 3.19737132  | 2.11631928  |
| C | -5.35401978 | 1.23520459  | 1.3561557   |
| H | -5.61644326 | 0.72358816  | 2.28473347  |
| C | -3.37455041 | -3.26440725 | 0.92016283  |
| H | -3.3748015  | -2.55650368 | 1.75033774  |
| C | -2.71715175 | -4.477933   | 1.00254301  |

|   |             |             |             |
|---|-------------|-------------|-------------|
| H | -2.17392223 | -4.72017998 | 1.9187732   |
| C | -3.98776448 | -3.77297753 | -1.35973428 |
| H | -4.46795511 | -3.46236433 | -2.29022236 |
| C | -3.34685849 | -5.00592846 | -1.25555951 |
| H | -3.34422949 | -5.6707912  | -2.1203675  |
| C | 1.60327412  | -5.2506947  | 1.35965552  |
| H | 2.17509153  | -5.21921624 | 2.28965731  |
| C | 0.43692543  | -6.00612747 | 1.25536548  |
| H | 0.10697348  | -6.58419493 | 2.11957628  |
| C | 0.14806373  | -5.23252846 | -1.00124614 |
| H | -0.44501791 | -5.17333092 | -1.9166337  |
| C | 1.31902329  | -4.50207796 | -0.91881841 |
| H | 1.668067    | -3.88530295 | -1.74831942 |
| C | 7.48584162  | 1.89423159  | 1.22602257  |
| H | 8.34611759  | 1.21961651  | 1.10628801  |
| H | 7.86905704  | 2.91997696  | 1.33790975  |
| H | 6.97932959  | 1.61662093  | 2.16000159  |
| C | 7.41392593  | 2.15312969  | -1.22935261 |
| H | 6.83501565  | 2.13690715  | -2.16236491 |
| H | 7.81563523  | 3.16993838  | -1.11008068 |
| H | 8.26269093  | 1.46154207  | -1.34265217 |
| C | -5.57204248 | 5.343537    | -1.2268051  |
| H | -6.6532595  | 5.18195662  | -1.10696366 |
| H | -5.39864083 | 6.42460697  | -1.33980061 |
| H | -5.26870135 | 4.85086466  | -2.16019869 |
| C | -5.3824611  | 5.53471958  | 1.22855728  |
| H | -4.88832298 | 5.23457835  | 2.16220836  |
| H | -5.22887365 | 6.61716312  | 1.10924746  |
| H | -6.46227688 | 5.35327278  | 1.34076401  |
| C | -2.1031031  | -7.43008635 | 1.22711791  |
| H | -1.40568066 | -8.27411206 | 1.34000552  |
| H | -2.09165144 | -6.85226799 | 2.1608808   |
| H | -3.11698344 | -7.83877997 | 1.10660319  |
| C | -1.8415004  | -7.4981413  | -1.22794957 |
| H | -2.86459141 | -7.88796101 | -1.34133971 |
| H | -1.56605744 | -6.98922275 | -2.16125697 |
| H | -1.16140146 | -8.35404727 | -1.10796179 |

E(el) / Hartree : -2064.71141

E(el) SMD-PBE0-D3(BJ)/def2-SVP / Hartree -2064.7612

E(el) PBE0-D3(BJ)/def2-TZVPP / Hartree -2066.88759

Thermal corrections / Hartree

ZPVE: 0.771339 E(therm.): 0.814221

H(corr.): 0.815165 G(corr.): 0.696763

Imaginary frequencies: 0

**(E,E,Z)-2**

|   |             |             |             |
|---|-------------|-------------|-------------|
| H | -4.7491615  | -4.42036705 | -1.86494019 |
| H | -5.87076352 | -2.5093664  | -2.97015346 |
| H | 4.16941295  | -3.45962907 | -2.18743528 |
| H | 6.33857135  | -2.25831829 | -2.35913273 |
| H | 5.65633966  | 0.52919172  | -2.31615596 |
| H | 3.85108351  | 2.18460508  | -1.96744757 |
| C | -4.86465598 | -3.4845452  | -1.31735682 |
| C | -5.48715332 | -2.41606338 | -1.95216658 |
| H | -2.00983492 | -4.3515391  | 2.9419231   |
| H | -3.65020365 | 0.6988944   | -1.63225449 |
| C | 4.58629702  | -2.93538067 | -1.32472885 |
| C | 5.80007038  | -2.25518721 | -1.41035233 |
| C | 5.64230464  | 1.11692952  | -1.39609001 |
| C | -1.50907073 | -4.1892693  | 1.98690122  |
| H | 0.42491063  | -3.85751943 | 2.91537884  |
| H | -2.21039972 | 2.31367065  | -0.47195364 |
| C | 4.62489483  | 2.03288062  | -1.21365476 |
| C | -0.14190682 | -3.92094862 | 1.98411932  |
| C | -3.73446284 | -4.5404437  | 0.7340644   |
| C | -4.10048792 | 1.56050488  | -1.13577132 |
| H | 1.51210201  | 3.50462473  | 2.01189247  |
| C | -4.42308704 | -3.37996867 | 0.00581048  |
| C | -2.2331822  | -4.23686196 | 0.7921542   |
| C | -3.28831393 | 2.48204703  | -0.4796237  |
| C | 0.79211813  | 3.83404529  | 1.26119689  |
| C | -5.66695174 | -1.19222887 | -1.29927251 |
| C | 3.83682074  | -2.90154186 | -0.14662099 |
| N | 2.53204619  | -3.41970246 | -0.20560099 |
| H | -0.85346102 | 3.91644715  | 2.61847508  |
| C | 6.28145738  | -1.51160049 | -0.32848794 |
| C | 0.53920731  | -3.72123505 | 0.78157965  |
| C | 7.39392825  | -0.45855079 | -0.47059606 |
| N | -6.42478419 | -0.25298376 | -2.043953   |
| C | -0.53906084 | 4.06305718  | 1.58505781  |
| N | 2.49386187  | 3.55192343  | -0.49810084 |
| C | 6.57317383  | 0.83758693  | -0.37797843 |
| C | 4.50475764  | 2.70598089  | 0.0130334   |
| N | 1.89972041  | -3.38875992 | 0.86911294  |
| C | 1.22334375  | 3.95912228  | -0.06443472 |
| N | 3.34832694  | 3.40356203  | 0.39812687  |
| N | -6.40027896 | 0.97944592  | -1.93016145 |
| C | -1.53683677 | -4.01414592 | -0.41007725 |
| C | -5.48797788 | 1.74521351  | -1.16606357 |
| C | -0.17507998 | -3.77136431 | -0.4265494  |
| C | -1.47499344 | 4.43558262  | 0.61136076  |
| C | -4.62995026 | -2.15377061 | 0.6608931   |
| C | -3.81889805 | 3.6130962   | 0.15738222  |

|                   |             |             |             |
|-------------------|-------------|-------------|-------------|
| C                 | -5.24565054 | -1.07779483 | 0.03588455  |
| C                 | 0.3066827   | 4.36061751  | -1.04477089 |
| C                 | -2.95678984 | 4.62610875  | 0.92698075  |
| C                 | 4.36734769  | -2.25532243 | 0.98154831  |
| C                 | 5.5659862   | -1.57605751 | 0.88240382  |
| H                 | -2.0868937  | -4.01359301 | -1.35445859 |
| C                 | -1.01481741 | 4.61053967  | -0.70429049 |
| C                 | 6.52748049  | 1.61945083  | 0.78085537  |
| C                 | 5.49711387  | 2.53594688  | 0.98147488  |
| H                 | 0.36357089  | -3.5889501  | -1.35751535 |
| H                 | 0.65226031  | 4.44116122  | -2.07756019 |
| C                 | -6.0285189  | 2.88331647  | -0.55398132 |
| H                 | -4.29812384 | -2.03111903 | 1.69378611  |
| C                 | -5.21063945 | 3.78284607  | 0.11331488  |
| H                 | -1.71992447 | 4.895698    | -1.48853383 |
| H                 | -5.40548408 | -0.15269827 | 0.59024473  |
| H                 | 3.77962611  | -2.24692605 | 1.90038584  |
| H                 | 5.9161082   | -1.00689187 | 1.745906    |
| H                 | 7.25412382  | 1.46227997  | 1.57930104  |
| H                 | 5.40217258  | 3.08286892  | 1.92217316  |
| H                 | -7.10569636 | 3.04678138  | -0.62684938 |
| H                 | -5.67175061 | 4.64960861  | 0.59139189  |
| C                 | 8.14014788  | -0.54924824 | -1.80340695 |
| H                 | 8.91641688  | 0.2287305   | -1.84468681 |
| H                 | 8.6321526   | -1.52833656 | -1.90629949 |
| H                 | 7.48720523  | -0.40656542 | -2.67433404 |
| C                 | 8.42815427  | -0.59688559 | 0.64907222  |
| H                 | 7.97981026  | -0.60653453 | 1.65112766  |
| H                 | 8.97825848  | -1.5414525  | 0.52780775  |
| H                 | 9.15449161  | 0.22917796  | 0.61023843  |
| C                 | -3.33804797 | 6.06895406  | 0.54363347  |
| H                 | -3.24330243 | 6.24243256  | -0.53731872 |
| H                 | -4.37314657 | 6.30188114  | 0.8319927   |
| H                 | -2.67773656 | 6.77912086  | 1.06345058  |
| C                 | -3.25199731 | 4.43411111  | 2.42158296  |
| H                 | -4.32134553 | 4.5988954   | 2.61534253  |
| H                 | -3.01014065 | 3.41445871  | 2.75478974  |
| H                 | -2.68484013 | 5.15059975  | 3.03547175  |
| C                 | -4.35363264 | -4.71232607 | 2.12566817  |
| H                 | -5.43460412 | -4.89035282 | 2.02952908  |
| H                 | -3.9130764  | -5.57742857 | 2.64316227  |
| H                 | -4.21620136 | -3.83193136 | 2.7677552   |
| C                 | -3.91578466 | -5.87372643 | -0.00748858 |
| H                 | -3.45435513 | -5.86847799 | -1.00422057 |
| H                 | -3.43511349 | -6.67891845 | 0.56686734  |
| H                 | -4.98330712 | -6.11865765 | -0.11968091 |
| E(el) / Hartree : |             |             | -2064.68893 |

|                                          |             |            |          |
|------------------------------------------|-------------|------------|----------|
| E(el) SMD-PBE0-D3(BJ)/def2-SVP / Hartree | -2064.73917 |            |          |
| E(el) PBE0-D3(BJ)/def2-TZVPP / Hartree   | -2066.86578 |            |          |
| Thermal corrections / Hartree            |             |            |          |
| ZPVE:                                    | 0.771089    | E(therm.): | 0.814057 |
| H(corr.):                                | 0.815001    | G(corr.):  | 0.695204 |
| Imaginary frequencies:                   | 0           |            |          |

**(E,Z,Z)-2**

|   |             |             |             |
|---|-------------|-------------|-------------|
| C | -0.70375033 | 1.46714324  | 3.16384664  |
| H | -1.37851191 | 0.66673084  | 3.47860542  |
| C | -1.68866763 | 5.23237182  | 0.12427596  |
| H | -1.67653681 | -4.31230109 | 2.06632441  |
| H | -2.43520829 | 4.55542335  | -0.29789377 |
| H | -0.94959676 | -7.58377579 | 1.68589959  |
| N | -0.19568505 | 6.03211688  | 3.44649069  |
| N | -0.00267483 | 4.98168365  | 4.07837451  |
| C | -1.00795882 | -3.50878896 | 2.37998969  |
| H | -1.73777228 | -2.14628463 | 0.90456305  |
| C | -0.47839478 | 6.02457962  | 2.05231532  |
| C | -1.03464075 | -2.28228503 | 1.72684886  |
| C | 0.09473195  | 3.72849607  | 3.41404264  |
| H | -2.69577474 | 3.80003563  | -3.2319837  |
| N | 0.00267483  | -4.98168365 | 4.07837451  |
| C | -0.21433871 | -6.9147938  | 1.23356975  |
| C | -0.09473195 | -3.72849607 | 3.41404264  |
| N | 0.19568505  | -6.03211688 | 3.44649069  |
| C | -0.92997351 | 6.04864405  | -0.72980167 |
| H | -0.59627434 | -7.58191963 | -0.76707089 |
| C | 0.14884713  | 1.25507236  | 2.0705276   |
| C | -1.66665076 | 3.50492984  | -3.02232314 |
| C | 0.21433871  | 6.9147938   | 1.23356975  |
| H | -1.97477083 | -2.38145397 | -2.34708257 |
| C | -0.14884713 | -1.25507236 | 2.0705276   |
| C | -1.1242216  | 5.9068634   | -2.24369762 |
| C | -0.0049667  | -6.90731369 | -0.14616857 |
| H | -2.03639423 | 1.42388513  | -3.5096515  |
| C | 0.47839478  | -6.02457962 | 2.05231532  |
| C | 0.0049667   | 6.90731369  | -0.14616857 |
| C | 0           | 0           | 1.21466221  |
| H | -1.31086787 | -4.74768432 | -1.95852971 |
| C | 0.71379372  | -2.67544589 | 3.85077828  |
| C | -1.30876242 | 2.17170466  | -3.19073053 |
| C | 1.00795882  | 3.50878896  | 2.37998969  |
| C | -0.74340962 | 4.45657852  | -2.56615635 |
| C | 0.70375033  | -1.46714324 | 3.16384664  |
| C | -0.95110324 | -2.71463694 | -2.53148089 |

|   |             |             |             |
|---|-------------|-------------|-------------|
| H | 0.94959676  | 7.58377579  | 1.68589959  |
| C | -0.57384851 | -4.03382843 | -2.33300762 |
| C | 1.03464075  | 2.28228503  | 1.72684886  |
| H | 1.38368872  | -2.83742671 | 4.69802036  |
| N | -0.45007224 | -0.43118059 | -2.97447558 |
| H | 0.59627434  | 7.58191963  | -0.76707089 |
| H | 1.67653681  | 4.31230109  | 2.06632441  |
| C | 0.92997351  | -6.04864405 | -0.72980167 |
| C | 0.00396224  | 1.7630409   | -2.92933919 |
| C | -0.00396224 | -1.7630409  | -2.92933919 |
| C | 1.47524849  | -5.21364242 | 1.49113914  |
| H | 1.37851191  | -0.66673084 | 3.47860542  |
| C | 0.57384851  | 4.03382843  | -2.33300762 |
| C | 0.74340962  | -4.45657852 | -2.56615635 |
| N | 0.45007224  | 0.43118059  | -2.97447558 |
| H | 1.73777228  | 2.14628463  | 0.90456305  |
| C | 1.1242216   | -5.9068634  | -2.24369762 |
| C | 0.95110324  | 2.71463694  | -2.53148089 |
| C | 1.68866763  | -5.23237182 | 0.12427596  |
| H | 2.05821205  | -4.54563962 | 2.12613204  |
| H | 1.31086787  | 4.74768432  | -1.95852971 |
| C | 1.30876242  | -2.17170466 | -3.19073053 |
| C | 1.66665076  | -3.50492984 | -3.02232314 |
| H | 1.97477083  | 2.38145397  | -2.34708257 |
| H | 2.43520829  | -4.55542335 | -0.29789377 |
| H | 2.03639423  | -1.42388513 | -3.5096515  |
| H | 2.69577474  | -3.80003563 | -3.2319837  |
| C | -0.71379372 | 2.67544589  | 3.85077828  |
| H | -1.38368872 | 2.83742671  | 4.69802036  |
| C | -1.47524849 | 5.21364242  | 1.49113914  |
| H | -2.05821205 | 4.54563962  | 2.12613204  |
| C | -1.22304496 | 0.24641507  | 0.31560365  |
| H | -1.34214787 | -0.54367112 | -0.43909923 |
| H | -2.1473915  | 0.31553918  | 0.90841564  |
| H | -1.09593196 | 1.19510919  | -0.22570653 |
| C | 1.22304496  | -0.24641507 | 0.31560365  |
| H | 1.34214787  | 0.54367112  | -0.43909923 |
| H | 2.1473915   | -0.31553918 | 0.90841564  |
| H | 1.09593196  | -1.19510919 | -0.22570653 |
| C | -2.57922175 | 6.23001654  | -2.60146252 |
| H | -3.29808531 | 5.60091048  | -2.05893982 |
| H | -2.79672192 | 7.27597797  | -2.34091217 |
| H | -2.7573376  | 6.10325152  | -3.68034839 |
| C | -0.22943551 | 6.85785085  | -3.04596157 |
| H | -0.47072903 | 7.9071231   | -2.81777039 |
| H | 0.83974752  | 6.70286882  | -2.84685774 |
| H | -0.39208598 | 6.69817576  | -4.12184366 |



|                                          |             |             |             |             |
|------------------------------------------|-------------|-------------|-------------|-------------|
| C                                        | 0.22943551  | -6.85785085 | -3.04596157 |             |
| H                                        | 0.47072903  | -7.9071231  | -2.81777039 |             |
| H                                        | -0.83974752 | -6.70286882 | -2.84685774 |             |
| H                                        | 0.39208598  | -6.69817576 | -4.12184366 |             |
| C                                        | 2.57922175  | -6.23001654 | -2.60146252 |             |
| H                                        | 3.29808531  | -5.60091048 | -2.05893982 |             |
| H                                        | 2.79672192  | -7.27597797 | -2.34091217 |             |
| H                                        | 2.7573376   | -6.10325152 | -3.68034839 |             |
| E(el) / Hartree :                        |             |             |             | -2064.69312 |
| E(el) SMD-PBE0-D3(BJ)/def2-SVP / Hartree |             |             |             | -2064.74202 |
| E(el) PBE0-D3(BJ)/def2-TZVPP / Hartree   |             |             |             | -2066.8685  |
| Thermal corrections / Hartree            |             |             |             |             |
| ZPVE:                                    |             | 0.771441    | E(therm.):  | 0.813942    |
| H(corr.):                                |             | 0.814886    | G(corr.):   | 0.699048    |
| Imaginary frequencies:                   |             |             |             | 0           |

### **(Z,Z,Z)-2**

|   |             |             |             |
|---|-------------|-------------|-------------|
| N | -1.91820426 | -3.54091745 | 3.07041793  |
| H | -2.55778801 | -1.01615198 | 3.57649878  |
| N | -0.89807447 | -4.07995637 | 2.62209463  |
| C | -3.03226272 | -1.40960103 | 2.67467306  |
| C | -2.74110615 | -2.71202208 | 2.26091283  |
| H | 2.48119115  | 0.23906937  | 2.74340911  |
| H | -0.29197711 | -1.60434587 | 1.74730285  |
| C | 3.13074446  | 0.90786417  | 2.17703127  |
| C | -3.89054116 | -0.62159243 | 1.92024793  |
| H | 4.57388326  | -0.6549413  | 1.82055024  |
| C | -0.36509512 | -3.7304748  | 1.35221658  |
| H | -4.05500179 | 0.41204587  | 2.23064743  |
| C | -0.05024745 | -2.40007139 | 1.04109518  |
| C | 4.31723322  | 0.39340593  | 1.66018932  |
| C | -3.37146794 | -3.22703803 | 1.12676427  |
| C | 1.40239876  | 2.80903797  | 2.37807747  |
| C | 2.75608121  | 2.2346391   | 1.94896343  |
| H | -3.16586409 | -4.25206261 | 0.81276052  |
| C | -4.54837376 | -1.12344846 | 0.78640151  |
| C | -0.00562544 | -4.7429589  | 0.46430559  |
| C | -4.27684114 | -2.44418123 | 0.41642423  |
| C | 5.17216715  | 1.21494811  | 0.92330888  |
| H | -0.21458418 | -5.7811255  | 0.73144794  |
| C | 0.59550916  | -2.10604365 | -0.14727184 |
| H | 0.41479403  | 5.27792825  | 1.44533279  |
| C | 3.64834177  | 3.05259671  | 1.23888079  |
| H | 0.87934506  | -1.07156698 | -0.35401059 |
| N | 6.40664088  | 0.73614393  | 0.40373819  |
| C | 0.66057317  | 3.15930878  | 1.08442084  |

|   |             |             |             |
|---|-------------|-------------|-------------|
| H | 5.78870938  | -2.76973442 | -0.18612065 |
| C | 4.85682079  | 2.56688302  | 0.7617044   |
| C | -5.49865495 | -0.22351333 | -0.01427602 |
| C | 0.24009179  | 4.45075224  | 0.75585307  |
| H | -4.98859817 | 2.48784804  | 0.42398436  |
| H | -4.77199024 | -2.88555901 | -0.44921712 |
| C | 0.59808804  | -4.42585116 | -0.75241337 |
| C | 5.05013717  | -2.1803773  | -0.73369521 |
| H | 3.70139262  | -3.81827877 | -1.01489073 |
| H | 3.3804574   | 4.09214613  | 1.03524906  |
| C | 0.91618418  | -3.10495375 | -1.07895954 |
| C | 3.88675912  | -2.76065655 | -1.21729009 |
| N | 6.44733115  | -0.2321426  | -0.36775212 |
| C | 0.4254847   | 2.13822318  | 0.15124694  |
| C | -4.45520492 | 2.08746868  | -0.43886555 |
| H | 0.7896589   | 1.12958729  | 0.35975702  |
| C | -4.6187188  | 0.74938522  | -0.81000409 |
| H | 5.54907362  | 3.2132855   | 0.2179961   |
| C | 5.25771746  | -0.80759215 | -0.89387862 |
| C | -0.38036734 | 4.71902903  | -0.46418399 |
| H | 0.84181471  | -5.23633163 | -1.4407752  |
| C | 2.93605781  | -2.01617585 | -1.93235413 |
| H | -0.66986999 | 5.73731661  | -0.73269351 |
| C | -3.61120495 | 2.94006681  | -1.14447824 |
| C | 1.63474371  | -2.69643222 | -2.36865883 |
| H | -3.48956435 | 3.97814351  | -0.82960199 |
| C | -0.2351991  | 2.38014032  | -1.04066035 |
| C | 4.34408219  | -0.0565603  | -1.63553775 |
| C | -3.91689402 | 0.30172573  | -1.9401608  |
| C | -0.65328185 | 3.68131531  | -1.35378873 |
| C | 3.20512666  | -0.66373317 | -2.15867252 |
| H | -3.99685628 | -0.74166259 | -2.25120792 |
| C | -2.93571522 | 2.4771026   | -2.27508337 |
| H | 4.517316    | 1.00892752  | -1.79473088 |
| C | -3.12001021 | 1.15571846  | -2.69011343 |
| H | -0.4089886  | 1.56783506  | -1.74797847 |
| H | 2.50745762  | -0.04864999 | -2.72869057 |
| N | -1.20552015 | 3.98750609  | -2.62661025 |
| N | -2.17705458 | 3.36904692  | -3.0803179  |
| H | -2.6108451  | 0.80147678  | -3.58926957 |
| C | 1.96162749  | -3.89285689 | -3.26832916 |
| H | 2.60719971  | -4.62985779 | -2.77088516 |
| H | 1.04302752  | -4.4055798  | -3.59224954 |
| H | 2.49022937  | -3.54377048 | -4.167193   |
| C | 0.71596882  | -1.756641   | -3.16016261 |
| H | 1.2021003   | -1.41591711 | -4.08703531 |
| H | -0.20637633 | -2.28947159 | -3.4339318  |

|                                          |             |             |             |             |  |
|------------------------------------------|-------------|-------------|-------------|-------------|--|
| H                                        | 0.42232866  | -0.87065916 | -2.57949807 |             |  |
| C                                        | -6.4510779  | 0.507558    | 0.94053261  |             |  |
| H                                        | -7.1130543  | 1.18461637  | 0.37983192  |             |  |
| H                                        | -7.07677319 | -0.22653198 | 1.46885504  |             |  |
| H                                        | -5.93331386 | 1.10134743  | 1.7046652   |             |  |
| C                                        | -6.38468607 | -1.02787702 | -0.97405882 |             |  |
| H                                        | -5.81717568 | -1.57839526 | -1.735259   |             |  |
| H                                        | -6.9936793  | -1.75560859 | -0.41679756 |             |  |
| H                                        | -7.0639736  | -0.34581217 | -1.50590777 |             |  |
| C                                        | 0.55710452  | 1.79891889  | 3.16482388  |             |  |
| H                                        | -0.40620091 | 2.25656666  | 3.43348668  |             |  |
| H                                        | 0.3380775   | 0.89248717  | 2.5827858   |             |  |
| H                                        | 1.06380806  | 1.49779551  | 4.09438601  |             |  |
| C                                        | 1.62811926  | 4.02751083  | 3.27922435  |             |  |
| H                                        | 0.66987559  | 4.46540227  | 3.59805855  |             |  |
| H                                        | 2.177972    | 3.72144015  | 4.18101156  |             |  |
| H                                        | 2.21564063  | 4.81367217  | 2.78510564  |             |  |
| E(el) / Hartree :                        |             |             |             | -2064.66686 |  |
| E(el) SMD-PBE0-D3(BJ)/def2-SVP / Hartree |             |             |             | -2064.72019 |  |
| E(el) PBE0-D3(BJ)/def2-TZVPP / Hartree   |             |             |             | -2066.84617 |  |
| Thermal corrections / Hartree            |             |             |             |             |  |
| ZPVE:                                    |             | 0.770474    | E(therm.):  | 0.813448    |  |
| H(corr.):                                |             | 0.814392    | G(corr.):   | 0.692555    |  |
| Imaginary frequencies:                   |             | 0           |             |             |  |

### TS (E,E,Z) → (E,E,E)

|   |             |             |             |
|---|-------------|-------------|-------------|
| C | 3.7081047   | -3.24447377 | -0.36603334 |
| C | 6.03306378  | -1.65239007 | -0.27033788 |
| C | 7.10791978  | -0.55539205 | -0.22089203 |
| C | 4.26286284  | 2.65960115  | 0.37462846  |
| C | 6.2630996   | 0.71442783  | -0.03331699 |
| N | 2.45844189  | -3.86624584 | -0.52787737 |
| N | 3.14174711  | 3.44489866  | 0.68888165  |
| N | 1.8517339   | -4.11076146 | 0.53369783  |
| C | -5.54099907 | -1.39422513 | -0.64532392 |
| C | -4.39713218 | -3.88264587 | -0.03463065 |
| C | -3.77098742 | -5.22221721 | 0.36725361  |
| C | 0.51368335  | -4.5110246  | 0.3991684   |
| C | -2.25205532 | -5.04923109 | 0.39832086  |
| N | -6.17693236 | -0.17270285 | -1.03930863 |
| N | -5.6485175  | 0.86717585  | -0.69725209 |
| N | 2.57085145  | 3.97227388  | -0.28634408 |
| C | 1.30321397  | 4.51371758  | -0.02780392 |
| C | -1.36294545 | 5.40796275  | 0.18875243  |
| C | -2.85290502 | 5.74814833  | 0.27886909  |
| C | -5.01468309 | 1.99848611  | -0.43492864 |

|   |             |             |             |
|---|-------------|-------------|-------------|
| C | -3.62329131 | 4.43927358  | 0.07367082  |
| C | 0.5038417   | 4.10324313  | 1.05227727  |
| H | 0.92576693  | 3.40079777  | 1.77287187  |
| C | -0.80754114 | 4.53382015  | 1.14063808  |
| H | -1.44192584 | 4.14676969  | 1.9416503   |
| C | -0.53747694 | 5.85296004  | -0.84951028 |
| H | -0.92623889 | 6.53777502  | -1.6039855  |
| C | 0.77188184  | 5.39336041  | -0.97299819 |
| H | 1.3999491   | 5.69238238  | -1.81504059 |
| C | -4.60759826 | 3.96161308  | 0.94273763  |
| H | -4.8639772  | 4.52395676  | 1.84292611  |
| C | -5.30108446 | 2.77749725  | 0.71290611  |
| H | -6.06779029 | 2.43948335  | 1.4111804   |
| C | -3.35124007 | 3.65284703  | -1.05718696 |
| H | -2.57138562 | 3.97096037  | -1.75514003 |
| C | -4.00762837 | 2.46667173  | -1.32428357 |
| H | -3.76153204 | 1.8779538   | -2.20896294 |
| C | -6.06578017 | -2.55925545 | -1.19885966 |
| H | -6.92030422 | -2.47231788 | -1.87356229 |
| C | -5.48978732 | -3.79280018 | -0.90269878 |
| H | -5.90514104 | -4.69203616 | -1.35920767 |
| C | -3.89676817 | -2.694423   | 0.53083343  |
| H | -3.04006493 | -2.74616247 | 1.20714183  |
| C | -4.4514502  | -1.46164418 | 0.23056016  |
| H | -4.04943717 | -0.54236355 | 0.66347963  |
| C | -0.232943   | -4.36720809 | -0.78197034 |
| H | 0.27441795  | -4.00388445 | -1.67700712 |
| C | -1.59225618 | -4.6277234  | -0.7707203  |
| H | -2.1741571  | -4.45758461 | -1.68055709 |
| C | -1.48757031 | -5.23751666 | 1.55283453  |
| H | -1.95866778 | -5.56972002 | 2.47839209  |
| C | -0.12277923 | -4.95985475 | 1.55804011  |
| H | 0.47189836  | -5.05601603 | 2.46884434  |
| C | 4.13812515  | -2.69188666 | 0.85115508  |
| H | 3.52005417  | -2.84300294 | 1.73704375  |
| C | 5.2750139   | -1.90832926 | 0.88718048  |
| H | 5.54346482  | -1.42034567 | 1.82618303  |
| C | 4.48889136  | -3.06021024 | -1.50931845 |
| H | 4.1466948   | -3.50185947 | -2.44780907 |
| C | 5.64590169  | -2.28465536 | -1.45648748 |
| H | 6.21772937  | -2.13187717 | -2.37279331 |
| C | 5.11759255  | 2.29240731  | 1.41697589  |
| H | 4.95441794  | 2.73270483  | 2.40313362  |
| C | 6.11893074  | 1.34744337  | 1.206893    |
| H | 6.75381937  | 1.06136405  | 2.04667856  |
| C | 5.44078811  | 1.14607994  | -1.08838805 |
| H | 5.51634421  | 0.66398625  | -2.06513814 |

|   |             |             |             |
|---|-------------|-------------|-------------|
| C | 4.46470126  | 2.1076541   | -0.89956699 |
| H | 3.7889134   | 2.40167928  | -1.70419436 |
| C | -3.13854054 | 6.38657274  | 1.64322652  |
| H | -2.53347125 | 7.29746951  | 1.76239144  |
| H | -4.19800925 | 6.67211148  | 1.72797052  |
| H | -2.90052893 | 5.71402674  | 2.47926094  |
| C | -3.28786922 | 6.74682397  | -0.80118499 |
| H | -3.13482401 | 6.35037007  | -1.81506346 |
| H | -4.36191121 | 6.95589943  | -0.69192987 |
| H | -2.7418838  | 7.69974813  | -0.71370368 |
| C | -4.1124827  | -6.35024013 | -0.61590047 |
| H | -3.57804384 | -7.26566136 | -0.32340431 |
| H | -5.18897849 | -6.57755109 | -0.60951922 |
| H | -3.81862201 | -6.10315807 | -1.64609125 |
| C | -4.3468435  | -5.59362598 | 1.74107122  |
| H | -4.11974148 | -4.83068113 | 2.49961304  |
| H | -5.44109439 | -5.67711898 | 1.67160647  |
| H | -3.95369812 | -6.56157265 | 2.08809269  |
| C | 8.08056016  | -0.80110018 | 0.93647214  |
| H | 8.78413551  | 0.03957087  | 1.0342646   |
| H | 7.57808713  | -0.93511419 | 1.90314531  |
| H | 8.66226677  | -1.713996   | 0.74186108  |
| C | 7.93922778  | -0.47680398 | -1.50396225 |
| H | 8.47067406  | -1.42457276 | -1.67889303 |
| H | 7.33893099  | -0.25775214 | -2.39644387 |
| H | 8.68834789  | 0.3227845   | -1.4091493  |

E(el) / Hartree : -2064.65893

E(el) SMD-PBE0-D3(BJ)/def2-SVP / Hartree -2064.70858

E(el) PBE0-D3(BJ)/def2-TZVPP / Hartree -2066.8322

Thermal corrections / Hartree

ZPVE: 0.769223 E(therm.): 0.812124

H(corr.): 0.813068 G(corr.): 0.693793

Imaginary frequencies: 1

### TS (*E,Z,Z*) → (*E,E,Z*)

|   |             |            |             |
|---|-------------|------------|-------------|
| C | -4.733184   | 3.56942545 | 1.39579029  |
| C | -3.97286808 | 4.16393684 | 0.39257627  |
| C | -2.87080662 | 3.50749685 | -0.16434282 |
| C | -4.44762609 | 2.2733644  | 1.82913723  |
| C | -2.55695234 | 2.22955153 | 0.32687317  |
| C | -3.33111155 | 1.60876245 | 1.29612122  |
| H | -3.05833853 | 0.61479152 | 1.6524703   |
| H | -1.67385625 | 1.71437562 | -0.06009113 |
| H | -5.5675956  | 4.09960163 | 1.85984662  |
| H | -4.24071478 | 5.16720591 | 0.05963468  |
| C | -2.0414719  | 4.10086664 | -1.30432637 |

|   |             |             |             |
|---|-------------|-------------|-------------|
| C | -0.5499171  | 3.97121786  | -0.99478702 |
| C | -0.04715115 | 4.37591278  | 0.25086466  |
| C | 0.38950914  | 3.53213445  | -1.93300253 |
| C | 1.75092532  | 3.49055634  | -1.66824045 |
| C | -2.3484753  | 5.58827708  | -1.53102286 |
| C | -2.43445978 | 3.33633072  | -2.57844547 |
| C | 2.2427659   | 3.9058807   | -0.40310601 |
| C | 1.30334406  | 4.35302802  | 0.56159023  |
| H | -0.74413026 | 4.71882588  | 1.02143166  |
| H | 2.45431436  | 3.13440153  | -2.4219236  |
| H | 0.06547639  | 3.20288036  | -2.92213223 |
| H | 1.6540891   | 4.67385546  | 1.54342926  |
| C | -1.06625331 | -4.50396195 | -0.67951937 |
| C | -2.45481361 | -4.59008627 | -0.67695585 |
| C | -3.25265141 | -3.504895   | -1.06625451 |
| C | -0.44453038 | -3.32403946 | -1.10205847 |
| C | -2.61094067 | -2.34246302 | -1.51931306 |
| C | -1.22916245 | -2.25678202 | -1.5569725  |
| H | -0.72016797 | -1.34886189 | -1.88758165 |
| H | -3.20698471 | -1.47340984 | -1.80724708 |
| H | -0.44376285 | -5.33193137 | -0.33602661 |
| H | -2.92135389 | -5.51613586 | -0.33763042 |
| C | -4.77996613 | -3.49566563 | -0.93980819 |
| C | -5.08862971 | -2.40306769 | 0.09107207  |
| C | -4.60152939 | -2.54943817 | 1.39918133  |
| C | -5.78023005 | -1.22804819 | -0.21687224 |
| C | -5.93036774 | -0.20829025 | 0.72099019  |
| C | -5.34360684 | -4.83391865 | -0.45027384 |
| C | -5.4007844  | -3.20662886 | -2.31102273 |
| C | -5.40972343 | -0.36175239 | 2.00756618  |
| C | -4.7870553  | -1.56486888 | 2.35697947  |
| H | -4.04641519 | -3.4506545  | 1.67028296  |
| H | -6.44704919 | 0.71532692  | 0.4526347   |
| H | -6.19631398 | -1.08004906 | -1.21447012 |
| H | -4.41951259 | -1.69345713 | 3.37722782  |
| C | 4.53918948  | 1.54030658  | 0.96463198  |
| C | 5.06118539  | 0.27774223  | 1.17482101  |
| C | 6.30051333  | -0.10491728 | 0.62667187  |
| C | 5.276678    | 2.47150116  | 0.22501383  |
| C | 7.04974565  | 0.8612229   | -0.04964859 |
| C | 6.55230288  | 2.15245193  | -0.23139957 |
| H | 7.11587118  | 2.91002892  | -0.78049922 |
| H | 8.02335545  | 0.60736527  | -0.4711091  |
| H | 3.55148234  | 1.81369218  | 1.34302499  |
| H | 4.46976811  | -0.45883057 | 1.72388781  |
| C | 6.72903745  | -1.57303363 | 0.75206473  |
| C | 5.49003841  | -2.3905994  | 0.37430167  |

|   |             |             |             |
|---|-------------|-------------|-------------|
| C | 4.89204527  | -3.32316879 | 1.22389167  |
| C | 4.8468228   | -2.09594688 | -0.84242839 |
| C | 3.59636753  | -2.60326862 | -1.13934824 |
| C | 7.18388203  | -1.82408649 | 2.19435143  |
| C | 7.88122693  | -1.93220554 | -0.19260532 |
| C | 2.95804713  | -3.45404771 | -0.22316899 |
| C | 3.64229944  | -3.86558856 | 0.92051774  |
| H | 5.3712035   | -3.60089183 | 2.16372221  |
| H | 3.06216327  | -2.31168964 | -2.04437986 |
| H | 5.30904014  | -1.38523824 | -1.53267726 |
| H | 3.14160405  | -4.55299571 | 1.60556584  |
| N | -5.23769056 | 1.78959174  | 2.90559657  |
| N | -5.59703552 | 0.61030965  | 3.02173231  |
| N | 3.54282934  | 3.84623478  | -0.1601837  |
| N | 4.7556642   | 3.74767284  | -0.16232708 |
| N | 1.60753538  | -3.83790063 | -0.33107565 |
| N | 0.93405202  | -3.07211461 | -1.04854845 |
| H | 8.80005788  | -1.38521065 | 0.06798056  |
| H | 7.63605931  | -1.71527611 | -1.24228663 |
| H | 8.09876987  | -3.00727184 | -0.1140804  |
| H | -2.15723015 | 6.18263701  | -0.62534436 |
| H | -3.39238848 | 5.75109168  | -1.84219369 |
| H | -1.6962456  | 5.97606689  | -2.32675359 |
| H | -2.16636595 | 2.27147839  | -2.51097974 |
| H | -1.94615239 | 3.76226569  | -3.46818144 |
| H | -3.52198581 | 3.40196455  | -2.73008765 |
| H | -6.49843517 | -3.16267692 | -2.2423468  |
| H | -5.13557802 | -4.01108151 | -3.01251488 |
| H | -5.04715649 | -2.26129917 | -2.7447448  |
| H | -4.95581502 | -5.12053265 | 0.53680742  |
| H | -5.10933017 | -5.64314601 | -1.15886951 |
| H | -6.43765517 | -4.76191525 | -0.36539422 |
| H | 6.38712972  | -1.60404008 | 2.91949639  |
| H | 8.03946534  | -1.17478369 | 2.43062599  |
| H | 7.50325295  | -2.86814123 | 2.33467895  |

E(el) / Hartree : -2064.64213

E(el) SMD-PBE0-D3(BJ)/def2-SVP / Hartree -2064.69211

E(el) PBE0-D3(BJ)/def2-TZVPP / Hartree -2066.81638

Thermal corrections / Hartree

ZPVE: 0.769009 E(therm.): 0.81182

H(corr.): 0.812765 G(corr.): 0.693076

Imaginary frequencies: 1

### TS (Z,Z,Z) → (E,Z,Z)

N 4.54084982 2.53125488 3.00885958

N 3.75739405 3.40474201 2.61321875

|   |             |             |             |
|---|-------------|-------------|-------------|
| C | 4.85461721  | 1.4058123   | 2.20091234  |
| C | 5.43894377  | 1.5659124   | 0.94433894  |
| C | 4.66517269  | 0.11884344  | 2.71275989  |
| C | 4.95258677  | -0.98413605 | 1.92162266  |
| C | 5.78153532  | 0.44735852  | 0.18930174  |
| C | 5.51036102  | -0.84750816 | 0.64067444  |
| H | 6.2414841   | 0.60317844  | -0.78715031 |
| H | 5.62461914  | 2.56953737  | 0.55738845  |
| H | 4.24564969  | 8.2989E-05  | 3.71422262  |
| H | 4.71849991  | -1.98082867 | 2.30184054  |
| C | 2.9757459   | 3.2421217   | 1.43539004  |
| C | 2.10734672  | 2.1528283   | 1.27803012  |
| C | 2.95619047  | 4.26870439  | 0.49275635  |
| C | 1.25491626  | 2.09905973  | 0.1856355   |
| C | 2.13129819  | 4.17568077  | -0.62705594 |
| C | 1.25859288  | 3.09674255  | -0.80094093 |
| H | 2.16208197  | 4.98096343  | -1.36189236 |
| H | 3.604468    | 5.13547997  | 0.63878041  |
| H | 2.09143896  | 1.35814282  | 2.02525264  |
| H | 0.56179745  | 1.25842915  | 0.1016031   |
| C | -2.1888375  | 2.29335942  | -1.92981395 |
| C | -1.45456353 | 4.09268896  | -0.52384608 |
| C | 5.71010952  | -2.08809862 | -0.23375329 |
| C | 4.31222019  | -2.58856595 | -0.61142463 |
| C | 6.47748747  | -1.76867661 | -1.52385153 |
| C | 6.51920152  | -3.1371035  | 0.53674952  |
| C | 3.8912282   | -3.91392012 | -0.47863416 |
| C | 3.3808748   | -1.68368869 | -1.14542076 |
| C | 2.61833604  | -4.33750296 | -0.84850347 |
| C | 2.10790092  | -2.05700066 | -1.52892696 |
| C | 1.69277631  | -3.4099895  | -1.38168902 |
| C | -3.49458801 | 2.46170282  | -1.47577368 |
| C | -2.75689037 | 4.29619498  | -0.09203375 |
| C | -3.78490554 | 3.4579605   | -0.53819857 |
| H | -3.00040674 | 5.09774384  | 0.60851958  |
| H | -4.29271823 | 1.82014689  | -1.85414034 |
| H | 2.3244531   | -5.3811886  | -0.72985721 |
| H | 4.56987889  | -4.66592202 | -0.07102843 |
| H | 1.40850269  | -1.3254374  | -1.9352155  |
| H | 3.65248372  | -0.62927133 | -1.24930759 |
| N | 0.46131584  | -3.74238479 | -1.73166312 |
| N | -0.68199732 | -3.85134458 | -2.12972186 |
| N | -5.09945347 | 3.77366299  | -0.11167839 |
| N | -5.92079079 | 2.94102328  | 0.29458853  |
| C | -1.71621269 | -3.61977452 | -1.16740897 |
| C | -2.98284684 | -3.34011294 | -1.68214582 |
| C | -1.50647124 | -3.63724413 | 0.21190599  |



|                                          |             |             |             |
|------------------------------------------|-------------|-------------|-------------|
| C                                        | -2.56409048 | -3.35987912 | 1.07076403  |
| C                                        | -4.01844152 | -3.02088325 | -0.81679045 |
| C                                        | -3.83244603 | -3.02858098 | 0.5743533   |
| C                                        | -5.00061022 | -2.62840684 | 1.48154863  |
| C                                        | -4.67786012 | -2.79598253 | 2.97097834  |
| C                                        | -6.20839069 | -3.52202667 | 1.17573529  |
| C                                        | -5.2690278  | -1.14932618 | 1.18278146  |
| C                                        | -6.44389368 | -0.69293538 | 0.57955662  |
| C                                        | -4.28361471 | -0.19924604 | 1.49810827  |
| C                                        | -6.62272887 | 0.65810733  | 0.29224212  |
| C                                        | -4.44196092 | 1.1446223   | 1.20168827  |
| C                                        | -5.61218087 | 1.58271941  | 0.56281491  |
| H                                        | -7.55153806 | 1.02160144  | -0.15227525 |
| H                                        | -3.65718419 | 1.85563353  | 1.46247779  |
| H                                        | -3.35314238 | -0.5227822  | 1.97050105  |
| H                                        | -7.24680388 | -1.3900244  | 0.33655434  |
| H                                        | -4.99042627 | -2.74243969 | -1.22942993 |
| H                                        | -2.38876195 | -3.39245735 | 2.14666492  |
| H                                        | -0.51303103 | -3.87382122 | 0.60088423  |
| H                                        | -3.11845798 | -3.34597926 | -2.76584452 |
| C                                        | -1.14175365 | 3.09309803  | -1.45700723 |
| H                                        | -0.65779029 | 4.73197556  | -0.13585794 |
| H                                        | -1.99418254 | 1.51455864  | -2.66878532 |
| C                                        | 0.29347435  | 2.98199365  | -1.98314448 |
| C                                        | 0.49295614  | 4.11021625  | -3.00510313 |
| C                                        | 0.55078815  | 1.64798329  | -2.69750452 |
| H                                        | 6.71551861  | -4.01907799 | -0.09121172 |
| H                                        | 6.00734266  | -3.48023503 | 1.44670781  |
| H                                        | 7.48992806  | -2.71436359 | 0.83504489  |
| H                                        | -3.82767565 | -2.18133368 | 3.29584033  |
| H                                        | -4.45180441 | -3.84691695 | 3.20766937  |
| H                                        | -5.54850737 | -2.49185171 | 3.56971388  |
| H                                        | -6.51927626 | -3.47610827 | 0.12339591  |
| H                                        | -7.06975714 | -3.23708967 | 1.79838304  |
| H                                        | -5.95791758 | -4.56919441 | 1.3996694   |
| H                                        | -0.21993156 | 3.98630612  | -3.83308723 |
| H                                        | 1.51134677  | 4.09255191  | -3.4237653  |
| H                                        | 0.31215941  | 5.10050878  | -2.56326802 |
| H                                        | -0.04356704 | 1.56636036  | -3.61956005 |
| H                                        | 0.30886535  | 0.78554828  | -2.06020009 |
| H                                        | 1.61195632  | 1.57508719  | -2.97738339 |
| H                                        | 6.60248383  | -2.69060661 | -2.11004534 |
| H                                        | 7.47730807  | -1.35895603 | -1.30830521 |
| H                                        | 5.93666021  | -1.05285207 | -2.15903117 |
| E(el) / Hartree :                        |             |             | -2064.62764 |
| E(el) SMD-PBE0-D3(BJ)/def2-SVP / Hartree |             |             | -2064.67954 |
| E(el) PBE0-D3(BJ)/def2-TZVPP / Hartree   |             |             | -2066.80287 |

Thermal corrections / Hartree

|                        |          |            |          |
|------------------------|----------|------------|----------|
| ZPVE:                  | 0.768767 | E(therm.): | 0.811621 |
| H(corr.):              | 0.812566 | G(corr.):  | 0.692384 |
| Imaginary frequencies: | 1        |            |          |

### Tetraazo macrocycle 3

#### **(E,E,E,E)-3**

|   |             |             |             |
|---|-------------|-------------|-------------|
| H | 7.87225031  | -3.24250187 | -1.37342285 |
| H | 0.83380745  | -7.47790637 | -3.27032698 |
| H | 3.02072949  | -7.22291221 | -2.56659946 |
| H | 1.65794209  | -9.00514694 | -2.84472086 |
| H | 9.19778988  | -1.19618435 | -0.88042889 |
| H | 4.78561479  | -5.63759376 | -1.83203466 |
| C | 0.78638378  | -8.36842213 | -2.62706998 |
| H | 9.4462796   | 1.11321633  | -0.94305558 |
| H | -0.11935177 | -8.92823557 | -2.9019455  |
| C | 7.59310248  | -2.58125469 | -0.55030322 |
| C | 2.99001495  | -6.8241261  | -1.55162361 |
| C | 8.32551799  | -1.4284211  | -0.26807377 |
| C | 3.98700317  | -5.94047502 | -1.15292154 |
| H | 10.5763459  | 0.28923861  | 0.16107062  |
| C | 9.78979245  | 1.05669989  | 0.09927785  |
| H | 7.20453848  | 1.39468682  | -1.1196612  |
| H | 0.44700291  | -5.36807421 | -1.73127202 |
| N | 5.72516231  | -4.03200402 | -0.19806965 |
| H | 10.2425123  | 2.02629279  | 0.35298071  |
| C | 6.46541464  | -2.90652127 | 0.20534262  |
| C | 0.72650171  | -7.99430358 | -1.14043701 |
| C | 1.93284901  | -7.16314954 | -0.69598734 |
| C | 6.93665953  | 2.03499596  | -0.27532451 |
| H | 5.41416293  | 3.10230697  | -1.38548939 |
| C | -0.47132788 | -5.77425544 | -1.30110481 |
| C | 7.93549705  | -0.5666611  | 0.76028266  |
| C | 3.94671627  | -5.37325054 | 0.12654842  |
| H | 1.63530885  | -9.83595301 | -0.44970533 |
| H | 3.41601621  | 6.3819035   | -2.58367004 |
| C | 8.6472847   | 0.75275538  | 1.0750938   |
| C | 5.93145253  | 2.97216118  | -0.43377472 |
| N | 4.80398476  | -4.35658226 | 0.57657572  |
| C | -0.51992981 | -7.12622505 | -0.92762449 |
| C | 0.69015194  | -9.28903749 | -0.31862343 |
| H | -1.49856836 | -3.86726673 | -1.31902242 |
| C | -1.54593764 | -4.93052259 | -1.07546188 |
| H | -0.12600051 | -9.94943668 | -0.64810806 |
| C | 7.58977632  | 1.85513265  | 0.9577628   |
| C | 6.08129691  | -2.06334306 | 1.26150179  |

|   |             |             |             |
|---|-------------|-------------|-------------|
| C | 2.68669727  | 6.47235346  | -1.77589314 |
| H | 1.3657651   | 7.75843942  | -2.86972907 |
| C | 6.8041252   | -0.91470275 | 1.5213877   |
| C | 1.94395307  | -6.63853717 | 0.60512572  |
| H | 9.98367649  | -0.1582687  | 2.51443938  |
| C | 2.93048854  | -5.75435053 | 1.01212808  |
| C | 9.24680402  | 0.65746146  | 2.48339154  |
| N | 4.09491374  | 5.00273768  | -0.52669333 |
| C | 1.53107451  | 7.23650371  | -1.92651688 |
| C | -1.71023033 | -7.61438842 | -0.37175722 |
| H | -0.85952333 | 8.02370342  | -3.23359301 |
| C | 5.5262926   | 3.75199058  | 0.66139998  |
| C | -2.72515319 | -5.42677933 | -0.50711179 |
| H | 0.56055733  | -9.0919229  | 0.75521497  |
| H | 9.76110769  | 1.59124669  | 2.75811197  |
| C | 2.93722091  | 5.79684683  | -0.58028118 |
| H | -1.06891949 | 5.79450517  | -2.45796349 |
| H | 5.19011921  | -2.32194571 | 1.83459413  |
| C | 7.19573755  | 2.65778289  | 2.03211477  |
| C | -2.80866915 | -6.78254748 | -0.17121888 |
| N | 4.45236094  | 4.65695439  | 0.61632375  |
| H | -0.10789934 | 9.49851837  | -2.56756172 |
| H | -1.78302117 | -8.66007446 | -0.06802181 |
| C | -0.89543719 | 8.74632981  | -2.40627782 |
| H | 1.12618466  | -6.87972594 | 1.2886711   |
| H | -2.85836241 | 4.06740703  | -2.2641878  |
| H | 6.46616335  | -0.24068478 | 2.31273647  |
| N | -3.72426886 | -4.47618417 | -0.25120088 |
| C | 6.16304142  | 3.58315052  | 1.89213671  |
| H | 8.48616788  | 0.44405084  | 3.24734818  |
| H | 2.91740744  | -5.30212778 | 2.00588676  |
| C | -1.86963563 | 5.91943923  | -1.7249087  |
| C | 0.58282069  | 7.3122403   | -0.90244801 |
| C | -2.85428278 | 4.94951261  | -1.62075737 |
| H | -1.86822837 | 9.25680079  | -2.45584032 |
| H | 7.67651024  | 2.55039833  | 3.00516962  |
| C | 2.0040076   | 5.88281655  | 0.46547292  |
| C | -0.74087731 | 8.07034873  | -1.03804567 |
| N | -4.88325876 | -4.90455891 | -0.09136849 |
| H | -3.73124115 | -7.15566269 | 0.27733291  |
| C | 0.84496943  | 6.61857346  | 0.29314048  |
| C | -1.86509967 | 7.04107853  | -0.88285431 |
| H | 5.8261302   | 4.18870409  | 2.73617945  |
| H | -4.37886133 | -2.62570718 | 1.24149997  |
| H | -5.98657319 | 2.07029849  | -1.48213111 |
| C | -5.80469969 | -3.8977729  | 0.25662266  |
| C | -5.42312213 | -2.73840391 | 0.94691231  |

|                                          |             |             |             |             |
|------------------------------------------|-------------|-------------|-------------|-------------|
| H                                        | 2.20318237  | 5.33506424  | 1.3877703   |             |
| C                                        | -3.85776325 | 5.06269754  | -0.65080986 |             |
| H                                        | -7.36448757 | 0.03173903  | -1.10956535 |             |
| H                                        | 0.06002889  | 9.85167079  | -0.1032115  |             |
| N                                        | -4.76186729 | 3.99021349  | -0.58026781 |             |
| C                                        | -0.78917994 | 9.16641172  | 0.03347109  |             |
| C                                        | -6.52856186 | 1.92023613  | -0.54760236 |             |
| C                                        | -7.14254207 | -4.07210346 | -0.10091206 |             |
| C                                        | -6.36261896 | -1.76249612 | 1.22874773  |             |
| C                                        | -7.30077745 | 0.79442915  | -0.32893034 |             |
| H                                        | 0.10114766  | 6.635146    | 1.09393013  |             |
| H                                        | -7.43064314 | -4.99042052 | -0.61701039 |             |
| C                                        | -2.89138801 | 7.15805134  | 0.06521569  |             |
| H                                        | -9.62595988 | -0.75743621 | -0.86793039 |             |
| H                                        | -6.05069038 | -0.86031917 | 1.76045481  |             |
| H                                        | -1.71519508 | 9.75606432  | -0.04488461 |             |
| C                                        | -3.87498841 | 6.18285415  | 0.18910755  |             |
| C                                        | -8.07193587 | -3.0641709  | 0.15274639  |             |
| C                                        | -7.69790931 | -1.88632969 | 0.80836026  |             |
| H                                        | -0.72685963 | 8.75838624  | 1.05202134  |             |
| N                                        | -5.5469847  | 4.00124223  | 0.38785498  |             |
| C                                        | -6.3953913  | 2.88203337  | 0.46797838  |             |
| C                                        | -9.91114523 | -0.78287375 | 0.19374051  |             |
| H                                        | -2.9226859  | 8.02046995  | 0.73280136  |             |
| C                                        | -7.9532723  | 0.57403368  | 0.89914133  |             |
| H                                        | -9.10219227 | -3.2057402  | -0.17749951 |             |
| H                                        | -10.5211358 | -1.68238661 | 0.36561487  |             |
| C                                        | -8.68349016 | -0.75293882 | 1.11496964  |             |
| H                                        | -4.66262501 | 6.25958089  | 0.94034949  |             |
| H                                        | -10.5455491 | 0.09268598  | 0.39521848  |             |
| C                                        | -7.0952634  | 2.71252064  | 1.66312184  |             |
| C                                        | -7.85873505 | 1.56549729  | 1.87826782  |             |
| C                                        | -9.15900239 | -0.92921598 | 2.56307455  |             |
| H                                        | -6.99171724 | 3.47819716  | 2.43482882  |             |
| H                                        | -9.63204025 | -1.91532709 | 2.67734213  |             |
| H                                        | -8.32133476 | -0.87703741 | 3.27378184  |             |
| H                                        | -8.35942229 | 1.44074378  | 2.83902478  |             |
| H                                        | -9.90147299 | -0.16419529 | 2.8384417   |             |
| E(el) / Hartree :                        |             |             |             | -2752.96792 |
| E(el) SMD-PBE0-D3(BJ)/def2-SVP / Hartree |             |             |             | -2753.03196 |
| E(el) PBE0-D3(BJ)/def2-TZVPP / Hartree   |             |             |             | -2755.86872 |
| Thermal corrections / Hartree            |             |             |             |             |
| ZPVE:                                    | 1.028808    | E(therm.):  | 1.087001    |             |
| H(corr.):                                | 1.087945    | G(corr.):   | 0.933216    |             |
| Imaginary frequencies:                   | 0           |             |             |             |

**(E,E,E,Z)-3**

|   |            |             |             |
|---|------------|-------------|-------------|
| H | 8.20025577 | 2.11408971  | -2.50769943 |
| H | 7.02889928 | 3.30732103  | -3.10723775 |
| H | 9.10783783 | 3.60043743  | -0.69529545 |
| H | 8.17385123 | 4.87809864  | -1.5031561  |
| C | 7.18679002 | 2.51688607  | -2.35919051 |
| C | 8.13814407 | 4.11896028  | -0.70695936 |
| H | 6.46022453 | 1.71533667  | -2.55763723 |
| H | 8.0650805  | 0.51104691  | -1.07652678 |
| C | 7.01429285 | 3.10148694  | -0.94948468 |
| H | 8.01961987 | 4.6312325   | 0.25904412  |
| H | 6.41578521 | -3.94153541 | -2.43256506 |
| C | 7.68404192 | 0.77120045  | -0.08802947 |
| H | 6.27147751 | 5.8013967   | -1.02638784 |
| H | 4.99755663 | -4.40084627 | -3.40292901 |
| C | 7.11844589 | 2.03070835  | 0.13893278  |
| C | 5.3163523  | -3.93889769 | -2.45588711 |
| C | 5.62614965 | 3.74110014  | -0.88533519 |
| C | 5.42160762 | 5.12227207  | -0.94849567 |
| H | 4.98553509 | -2.89000022 | -2.44755814 |
| C | 7.76180568 | -0.18370865 | 0.92159703  |
| H | 8.19602951 | -1.16263144 | 0.71279914  |
| H | 6.31571    | -6.24946924 | -1.5281483  |
| C | 4.49483851 | 2.90981711  | -0.79460628 |
| C | 6.67879588 | 2.32444949  | 1.43834475  |
| C | 4.1358929  | 5.65918363  | -0.90686041 |
| H | 4.73788306 | -6.63485591 | -2.24587642 |
| C | 5.22845663 | -6.17591857 | -1.37523147 |
| H | 4.63359994 | 1.82618423  | -0.7502093  |
| H | 3.96973806 | 6.7375473   | -0.95234171 |
| C | 4.77797552 | -4.71326455 | -1.243581   |
| H | 2.9148205  | -3.75243048 | -3.09413046 |
| H | 6.2439595  | 3.30480966  | 1.64869282  |
| C | 7.27641473 | 0.11067805  | 2.19993338  |
| C | 5.35065641 | -4.03450129 | 0.00212239  |
| C | 3.21569834 | 3.43287321  | -0.72769387 |
| C | 6.46597653 | -4.53225157 | 0.68259744  |
| C | 6.77645648 | 1.39179884  | 2.46052194  |
| H | 6.91290089 | -5.48201014 | 0.38599246  |
| C | 3.0267884  | 4.82374226  | -0.76929271 |
| C | 4.79625029 | -2.82511709 | 0.45116469  |
| C | 7.02261947 | -3.84002014 | 1.75465339  |
| C | 2.45577945 | -4.19838345 | -2.21146955 |
| H | 4.96240007 | -6.76798402 | -0.4877036  |
| H | 3.89837591 | -2.43589368 | -0.03593006 |
| C | 5.36143625 | -2.10882939 | 1.4963065   |

|   |             |             |             |
|---|-------------|-------------|-------------|
| C | 6.50690759  | -2.60097382 | 2.13790301  |
| H | 7.87809609  | -4.24213372 | 2.30143562  |
| C | 3.2510465   | -4.70742037 | -1.18177654 |
| N | 7.37870695  | -0.76746812 | 3.3096484   |
| N | 7.10885775  | -1.97528253 | 3.25998973  |
| H | 2.33853492  | 2.79120944  | -0.63379312 |
| N | 1.76505574  | 5.44067836  | -0.67735759 |
| H | 4.91732189  | -1.16548408 | 1.81923478  |
| H | 6.45051757  | 1.62838894  | 3.47551     |
| C | 1.06675491  | -4.24232949 | -2.1282018  |
| H | 0.43646089  | -3.83665943 | -2.92217356 |
| C | 2.60619571  | -5.26455961 | -0.06102952 |
| H | -0.08548502 | 7.00942634  | -1.3489975  |
| N | 0.86877601  | 4.7049849   | -0.22109427 |
| H | 3.2122855   | -5.64444171 | 0.76603182  |
| C | 0.43932652  | -4.80978268 | -1.01772763 |
| C | -0.81930542 | 6.44993169  | -0.76630874 |
| C | 1.22556203  | -5.32472533 | 0.02662192  |
| C | -0.41699778 | 5.26184348  | -0.14330394 |
| N | -0.96338061 | -4.78526242 | -1.03025513 |
| C | -2.13652342 | 6.88236955  | -0.649687   |
| H | -2.43285024 | 7.80104588  | -1.15887573 |
| H | 0.72372222  | -5.75329055 | 0.89550159  |
| C | -1.34880856 | 4.5292892   | 0.60048985  |
| H | -3.09522405 | -3.94977492 | -1.79195434 |
| N | -1.5347102  | -5.37841485 | -0.09425201 |
| H | -1.01773982 | 3.60048368  | 1.06925136  |
| C | -3.07874605 | 6.1573019   | 0.09453144  |
| H | -4.88917986 | 5.10184151  | -1.96412673 |
| H | -4.80505049 | 7.29635016  | -1.80551838 |
| C | -2.65348646 | 4.97850359  | 0.72547062  |
| C | -3.65330781 | -4.49457237 | -1.02978114 |
| H | -4.40621991 | 8.5872947   | -0.64897081 |
| C | -2.93859901 | -5.27970763 | -0.10992587 |
| C | -4.96267485 | 7.64686115  | -0.77586784 |
| H | -6.00677788 | 2.88795792  | -2.18176965 |
| C | -5.41540887 | 4.67558446  | -1.1070955  |
| C | -4.53711947 | 6.60629181  | 0.26667083  |
| C | -6.02639238 | 3.43706356  | -1.23819857 |
| C | -5.02784858 | -4.40239355 | -0.93234276 |
| H | -5.56475953 | -3.75134955 | -1.62650652 |
| H | -3.36912359 | 4.38625638  | 1.29967478  |
| C | -5.39980993 | 5.35040747  | 0.1220126   |
| H | -6.03211602 | 7.87379102  | -0.655737   |
| C | -3.63776816 | -5.97769553 | 0.87601948  |
| H | -4.01372293 | 8.1336315   | 1.71064975  |
| C | -4.66190011 | 7.24701057  | 1.65574257  |

|   |             |             |             |
|---|-------------|-------------|-------------|
| H | -7.48592245 | -4.92620681 | -2.0334312  |
| H | -3.06705244 | -6.58338275 | 1.58323429  |
| C | -6.6057412  | 2.81925847  | -0.12426042 |
| C | -5.74632679 | -5.08541617 | 0.06734551  |
| N | -7.00277623 | 1.48055567  | -0.29556966 |
| H | -4.34643262 | 6.56081113  | 2.454371    |
| C | -5.02763303 | -5.88503747 | 0.95946271  |
| C | -6.08291637 | 4.76860834  | 1.1992949   |
| H | -8.19334123 | -0.47412517 | -1.36632173 |
| C | -7.91592482 | -5.38070822 | -1.13048822 |
| H | -8.33490534 | -2.94210392 | -1.58672924 |
| C | -7.86146836 | -1.12711341 | -0.5574895  |
| C | -7.92453937 | -2.51146066 | -0.67208844 |
| H | -7.76492027 | -6.46728035 | -1.2075279  |
| C | -6.66758477 | 3.51209448  | 1.08951745  |
| H | -5.69690211 | 7.56632255  | 1.85488959  |
| C | -7.26220928 | -4.86305064 | 0.15635777  |
| N | -7.0614254  | 0.82207512  | 0.7611679   |
| C | -7.32153733 | -0.54891201 | 0.59660475  |
| C | -7.42677492 | -3.3496531  | 0.33631249  |
| H | -6.12183449 | 5.27998035  | 2.16200579  |
| H | -8.99934077 | -5.18487705 | -1.12716531 |
| H | -5.54502474 | -6.4341769  | 1.74733871  |
| C | -6.94761665 | -2.75197812 | 1.51073617  |
| C | -6.91449851 | -1.3732843  | 1.65154017  |
| H | -7.14131689 | 3.02947511  | 1.94573486  |
| H | -6.54378432 | -3.37646162 | 2.31040709  |
| H | -6.51168873 | -0.90033244 | 2.54939834  |
| C | -7.90331954 | -5.6046371  | 1.3330585   |
| H | -7.78285457 | -6.69288018 | 1.22230801  |
| H | -7.47630472 | -5.31349525 | 2.30235283  |
| H | -8.98044622 | -5.38478496 | 1.36477697  |

E(el) / Hartree : -2752.94683

E(el) SMD-PBE0-D3(BJ)/def2-SVP / Hartree -2753.01199

E(el) PBE0-D3(BJ)/def2-TZVPP / Hartree -2755.84859

Thermal corrections / Hartree

ZPVE: 1.028529 E(therm.): 1.086705

H(corr.): 1.087649 G(corr.): 0.93254

Imaginary frequencies: 0

### **(E,E,Z,Z)-3**

|   |            |            |             |
|---|------------|------------|-------------|
| H | 2.58726154 | 3.29854426 | -4.00082873 |
| H | 4.33930319 | 3.2375342  | -3.71474885 |
| C | 3.35662766 | 3.2166031  | -3.21960173 |
| H | 2.88541074 | 5.79608915 | -3.85991348 |
| H | 3.23305241 | 2.23908417 | -2.73028195 |

|   |             |             |             |
|---|-------------|-------------|-------------|
| H | 4.56182069  | 5.69434783  | -3.27827039 |
| C | 3.50932149  | 5.68706129  | -2.95980232 |
| C | 3.20485253  | 4.37538738  | -2.2229183  |
| H | 5.49433506  | 2.78974543  | -1.93445904 |
| H | 1.02360382  | 6.05699592  | -2.73902643 |
| C | 0.78355831  | 5.24241708  | -2.05417073 |
| C | 1.77639159  | 4.32620644  | -1.67879058 |
| H | 3.34847777  | 6.56346944  | -2.31516858 |
| C | 5.29528486  | 3.42016704  | -1.0666253  |
| H | 3.98842063  | -0.59826902 | -2.356452   |
| C | -0.51581863 | 5.13992591  | -1.57030405 |
| C | 1.42637305  | 3.29976764  | -0.7895448  |
| C | 4.18105882  | 4.26557561  | -1.0507493  |
| H | 5.22581699  | -0.29750669 | -0.22606296 |
| H | -1.29239423 | 5.84768525  | -1.8647965  |
| H | 2.18774408  | 2.58302474  | -0.47096334 |
| H | 7.71625216  | -2.87183103 | 0.67560893  |
| C | 0.13579639  | 3.19294923  | -0.29500996 |
| C | -0.85013224 | 4.10790035  | -0.6856552  |
| C | 4.12994508  | -1.43877416 | -1.67303987 |
| H | -5.26624401 | 5.48086319  | -1.57024113 |
| C | 6.16821918  | 3.35034293  | 0.01552204  |
| H | 7.0258202   | 2.67719675  | -0.0209685  |
| C | 4.8295352   | -1.28162392 | -0.48001131 |
| H | 6.79753842  | -4.20584939 | 1.39051656  |
| C | 7.09932742  | -3.15998399 | 1.53885209  |
| N | -2.12788491 | 3.88754687  | -0.1497978  |
| H | -0.14805495 | 2.39875135  | 0.39843942  |
| C | 3.99288199  | 5.0799151   | 0.07610019  |
| C | -5.42944814 | 4.8170574   | -0.71849234 |
| H | 7.71951373  | -3.11779621 | 2.44708651  |
| N | 2.99151096  | -2.74933601 | -3.31291104 |
| H | -7.56789764 | 4.81001928  | -0.90497402 |
| H | 1.31679365  | -5.94238289 | -3.92239309 |
| N | -3.04764706 | 4.60399881  | -0.59230153 |
| C | 3.59662043  | -2.67926314 | -2.032084   |
| N | 2.0350691   | -3.4820624  | -3.59931539 |
| C | -6.71618629 | 4.4333059   | -0.33666563 |
| H | 3.13350261  | 5.75428363  | 0.1121558   |
| C | 5.94821604  | 4.14771035  | 1.14342992  |
| C | 5.05161416  | -2.36647439 | 0.37627214  |
| H | -9.21525055 | 3.21707832  | -0.90414447 |
| C | -4.31357323 | 4.30353732  | -0.05605113 |
| C | 5.86084873  | -2.26236718 | 1.67796199  |
| C | 4.87454846  | 5.04538987  | 1.14611419  |
| H | -7.793311   | 1.67570279  | -1.31117175 |
| C | 0.92735468  | -5.52243203 | -2.99258797 |



|   |             |             |             |
|---|-------------|-------------|-------------|
| C | 6.25634124  | -0.81494645 | 1.96984439  |
| C | 7.58411545  | -0.37628743 | 1.93152367  |
| H | 8.38680451  | -1.07379106 | 1.6933022   |
| H | -9.5578689  | 4.48879967  | 0.29071618  |
| C | -9.40276244 | 3.40695159  | 0.16131365  |
| C | 1.27283487  | -4.21268899 | -2.65422645 |
| C | 5.27433095  | 0.13344223  | 2.30179468  |
| C | 7.92226501  | 0.94576185  | 2.20750832  |
| C | 3.83640579  | -3.7830071  | -1.20002896 |
| H | -6.86268332 | -0.59475816 | -1.69864765 |
| N | 6.83570106  | 4.21041358  | 2.24911114  |
| H | 4.2260325   | -0.1692559  | 2.35310417  |
| H | 8.96490858  | 1.27044135  | 2.20277506  |
| C | 4.55092012  | -3.617419   | -0.02324618 |
| C | 6.92538448  | 1.88484009  | 2.46779057  |
| C | 5.59053464  | 1.46443878  | 2.53471335  |
| C | -7.6976049  | 0.98349125  | -0.47211398 |
| C | -6.91249746 | 3.54571553  | 0.72403     |
| H | -0.13221288 | -7.29942385 | -2.44227958 |
| C | 0.10374938  | -6.27337774 | -2.15692996 |
| C | 5.01959233  | -2.79004594 | 2.85626047  |
| C | -4.50205743 | 3.47478546  | 1.06186627  |
| H | -10.3388753 | 2.89583393  | 0.42969265  |
| C | -7.16735928 | -0.27649774 | -0.69967896 |
| H | 4.76978355  | -3.85205343 | 2.71808674  |
| N | 7.32754319  | 3.20809919  | 2.78405715  |
| H | 4.7414049   | 5.69893079  | 2.01077889  |
| H | 4.80469746  | 2.18476826  | 2.77000207  |
| C | -8.26952832 | 2.90882433  | 1.06121809  |
| H | 5.5834728   | -2.69257649 | 3.7961947   |
| C | -5.77959039 | 3.11382738  | 1.43981202  |
| H | 3.47421677  | -4.77285552 | -1.48000343 |
| C | 0.72536185  | -3.63904959 | -1.49724075 |
| C | -8.00725695 | 1.41504511  | 0.82555636  |
| H | -2.98831513 | -5.30011943 | -1.82576487 |
| H | -4.88499576 | -3.74079775 | -1.41427968 |
| H | -3.62315887 | 3.0958806   | 1.58429411  |
| H | 4.72739609  | -4.49734683 | 0.59942377  |
| H | -2.39404577 | -7.64426229 | -1.60960208 |
| H | 4.07487703  | -2.23971129 | 2.96466547  |
| H | 0.95257677  | -2.60201748 | -1.24306977 |
| C | -0.44025448 | -5.72146706 | -0.9939532  |
| C | -6.90928485 | -1.13617599 | 0.37439885  |
| C | -3.29650445 | -5.07676876 | -0.80082728 |
| H | -8.81663514 | 4.30950036  | 2.61704726  |
| C | -4.3509205  | -4.20893967 | -0.58654136 |
| C | -8.64738539 | 3.22802702  | 2.51111421  |

C -0.12004716 -4.38722264 -0.69214011  
 N -6.13342768 -2.26531447 0.06948862  
 C -1.85756395 -7.81573938 -0.66521819  
 H -5.90486719 2.42211359 2.2759172  
 H -1.028032 -8.51270149 -0.85901731  
 C -7.8689424 0.4935595 1.87471356  
 H -9.57357188 2.70719665 2.79913263  
 C -1.35423428 -6.50494808 -0.04617677  
 C -7.31623992 -0.76375809 1.66183139  
 N -5.64984763 -2.86565727 1.04946349  
 C -2.56853049 -5.63078008 0.26905636  
 C -4.71478991 -3.86539887 0.72653651  
 H -7.86037362 2.94895287 3.22470816  
 H -2.55246558 -8.30787704 0.03067326  
 H -0.56330501 -3.91842738 0.19025546  
 H -8.14034176 0.78053608 2.89199243  
 C -0.53799289 -6.84848141 1.20697196  
 H 0.34705007 -7.43469729 0.91963445  
 H -7.13479311 -1.45237001 2.48856742  
 C -4.04045764 -4.4538988 1.79722965  
 C -2.97741199 -5.32677619 1.56941284  
 H -0.1864947 -5.94425166 1.72495627  
 H -1.12563535 -7.4511994 1.91643957  
 H -4.33913795 -4.17522936 2.80998638  
 H -2.44732731 -5.74438699 2.42619817

E(el) / Hartree : -2752.92396

E(el) SMD-PBE0-D3(BJ)/def2-SVP / Hartree -2752.99015

E(el) PBE0-D3(BJ)/def2-TZVPP / Hartree -2755.8265

Thermal corrections / Hartree

ZPVE: 1.028152 E(therm.): 1.086277

H(corr.): 1.087222 G(corr.): 0.931548

Imaginary frequencies: 0

### **(E,Z,E,Z)-3**

H 5.65891911 4.11675965 -3.51455816  
 H 7.23937601 3.37079264 -3.1973359  
 C 6.20046018 3.43729995 -2.84045295  
 H 5.74024632 2.4420681 -2.92442322  
 H 6.5292151 6.01725244 -2.1024914  
 H -6.81794507 2.87308646 -2.95360044  
 C 6.90805335 5.30266917 -1.35569104  
 H 7.9692837 5.11670768 -1.57567027  
 C 6.13541964 3.97738177 -1.40439161  
 C 4.05395433 5.39748524 -0.89104617  
 H 5.58031989 -4.15277143 -3.31225995  
 C 4.65940815 4.14770439 -1.04140805

|   |             |             |             |
|---|-------------|-------------|-------------|
| H | 4.63734635  | 6.31065803  | -1.01275219 |
| C | -6.98452125 | 2.73269037  | -1.88354677 |
| N | -8.61627167 | 1.06077352  | -2.46840121 |
| C | 2.70065133  | 5.50192977  | -0.57695863 |
| H | 7.88527806  | 1.8315943   | -1.82288018 |
| C | 3.86039623  | 3.00072916  | -0.87012498 |
| N | -8.73020011 | -0.1728784  | -2.47263742 |
| H | 2.22000768  | 6.47439871  | -0.45189115 |
| H | 5.56670418  | -2.52212094 | -2.57949169 |
| C | 6.00400898  | -3.52904747 | -2.51026723 |
| H | -5.50549992 | 4.16496607  | -1.28195027 |
| C | 1.92061797  | 4.35698822  | -0.40684655 |
| H | 7.08474965  | -3.43748339 | -2.69140827 |
| C | 2.51492973  | 3.09274395  | -0.55986083 |
| H | 3.52257816  | -3.7284665  | -2.73669435 |
| H | 4.32153243  | 2.01387642  | -0.96715175 |
| N | 0.57097714  | 4.57134578  | -0.08180287 |
| C | -6.26605375 | 3.45660078  | -0.94330604 |
| C | -7.91089262 | 1.77160277  | -1.46493075 |
| H | 6.8509087   | 5.77121839  | -0.36240257 |
| H | -6.11762333 | -0.03315381 | -1.55250267 |
| H | 1.89533657  | 2.20547126  | -0.42153616 |
| C | 7.65411425  | 1.9988454   | -0.76992916 |
| C | 6.78355762  | 3.0278131   | -0.39503123 |
| H | 1.13397418  | -3.89256906 | -2.08483574 |
| C | 3.26815378  | -4.0057579  | -1.71302284 |
| H | -6.07829274 | 6.00867436  | 0.35280808  |
| C | -8.04301068 | -1.0320977  | -1.57397046 |
| C | -6.69910995 | -0.88559284 | -1.1996809  |
| H | -1.3959985  | 5.91682816  | 0.44433565  |
| C | -2.03388638 | 5.04126869  | 0.57277334  |
| C | 1.92665427  | -4.09357074 | -1.36262758 |
| H | -3.79863167 | 6.16408167  | 1.01503356  |
| N | -0.11747349 | 3.54429775  | 0.07597674  |
| C | -3.38033066 | 5.164209    | 0.89171222  |
| H | 5.73329803  | -6.20539231 | -1.82486473 |
| C | 5.76787746  | -4.15276741 | -1.12661675 |
| C | -1.46630379 | 3.77221138  | 0.40432308  |
| H | 7.3704541   | -5.60653015 | -1.49194301 |
| C | -6.48667376 | 3.29003581  | 0.43209138  |
| C | 8.23017254  | 1.1559934   | 0.17601091  |
| C | -8.17734533 | 1.62350238  | -0.10155236 |
| C | 6.32815486  | -5.58353543 | -1.14013422 |
| C | -6.21192515 | 5.57065146  | 1.35259611  |
| H | 8.89014388  | 0.34607659  | -0.14013793 |
| H | -2.68131788 | -4.78719321 | -1.97812697 |
| C | 4.28309279  | -4.2453485  | -0.77685298 |

|   |             |             |             |
|---|-------------|-------------|-------------|
| C | 6.54901622  | 3.22036024  | 0.97443582  |
| C | -8.74073084 | -2.16822558 | -1.157576   |
| C | -4.19866388 | 4.03684001  | 1.04844001  |
| C | -6.10249237 | -1.83394651 | -0.38193314 |
| C | -2.27118616 | 2.63739563  | 0.56362594  |
| H | -7.28847374 | 5.57409714  | 1.5768213   |
| H | -9.76838169 | -2.30093676 | -1.5022493  |
| C | 6.48202567  | -3.25793138 | -0.11073418 |
| C | -5.67983795 | 4.13256474  | 1.42150988  |
| C | -7.47371437 | 2.38250759  | 0.82956807  |
| H | -5.05323612 | -1.70702825 | -0.10572555 |
| C | -3.61632819 | 2.77188718  | 0.87790637  |
| H | 5.88054653  | 4.02321402  | 1.29585142  |
| N | -0.63527875 | -4.43001287 | -0.47112588 |
| C | -2.97147354 | -4.54797089 | -0.95296746 |
| H | -8.92541129 | 0.90115849  | 0.23057951  |
| H | -5.71284536 | 6.2202547   | 2.0878309   |
| H | 8.30195803  | -4.42362025 | 0.00660884  |
| C | 7.78279832  | -3.52051442 | 0.33046868  |
| H | -5.08304895 | -4.56449637 | -1.34012554 |
| C | 1.56680457  | -4.41690372 | -0.04920171 |
| H | -1.8122852  | 1.65598172  | 0.42628047  |
| C | 5.85414063  | -2.09471261 | 0.3628898   |
| H | 4.82572807  | -1.88124203 | 0.06198206  |
| C | -4.30384391 | -4.4263193  | -0.58629395 |
| C | -1.95887469 | -4.35000472 | -0.00620248 |
| C | 7.95051441  | 1.33732817  | 1.53337983  |
| H | 6.28793484  | -6.04498692 | -0.14276322 |
| C | -8.13741878 | -3.10171875 | -0.3202086  |
| C | 7.14243524  | 2.40817952  | 1.92996214  |
| H | -4.23809653 | 1.87819306  | 0.97746012  |
| C | -6.80802895 | -2.95269869 | 0.08871736  |
| N | 0.2409945   | -4.45212659 | 0.41468457  |
| C | 3.90677023  | -4.59306567 | 0.52934264  |
| C | 8.43466184  | -2.65315628 | 1.20229159  |
| C | 6.50130903  | -1.21105612 | 1.21368361  |
| C | 2.57047048  | -4.66621539 | 0.89484424  |
| H | -7.69647506 | 2.24192211  | 1.88815825  |
| C | 7.81811127  | -1.47209326 | 1.62065816  |
| H | 9.43816537  | -2.8741456  | 1.57191402  |
| C | -5.82661778 | 3.63782559  | 2.86741729  |
| C | -4.66671111 | -4.07938008 | 0.72404303  |
| C | -2.30613888 | -4.02998693 | 1.31131572  |
| H | 5.98195406  | -0.3195963  | 1.56771685  |
| H | -8.71867372 | -3.96656073 | 0.00291301  |
| N | 8.54084835  | 0.55453516  | 2.55745828  |
| H | 4.68006986  | -4.77260827 | 1.2805521   |

|                                          |             |             |            |             |
|------------------------------------------|-------------|-------------|------------|-------------|
| C                                        | -6.14634343 | -3.92220056 | 1.07181076 |             |
| H                                        | -6.76670305 | -5.74331972 | 0.01363475 |             |
| H                                        | 6.96953366  | 2.56969432  | 2.9960158  |             |
| H                                        | -6.86100574 | 3.75030931  | 3.2263648  |             |
| C                                        | -3.64330726 | -3.89320052 | 1.6630199  |             |
| H                                        | -5.17696598 | 4.2308254   | 3.52745352 |             |
| N                                        | 8.54224     | -0.68424846 | 2.5541611  |             |
| H                                        | -5.5355242  | 2.58234497  | 2.96993468 |             |
| H                                        | -1.50634248 | -3.87000145 | 2.03594293 |             |
| C                                        | -6.78289204 | -5.32048918 | 1.02857766 |             |
| H                                        | 2.27081732  | -4.90672959 | 1.91696042 |             |
| H                                        | -5.87334848 | -2.35716275 | 2.58364413 |             |
| C                                        | -6.35655983 | -3.33954877 | 2.47727043 |             |
| H                                        | -3.8865676  | -3.61870463 | 2.69010476 |             |
| H                                        | -7.82542899 | -5.30163172 | 1.37953173 |             |
| H                                        | -6.22378726 | -6.00026415 | 1.68797317 |             |
| H                                        | -7.43221556 | -3.20403066 | 2.66091995 |             |
| H                                        | -5.9640088  | -4.01168361 | 3.2557301  |             |
| E(el) / Hartree :                        |             |             |            | -2752.93449 |
| E(el) SMD-PBE0-D3(BJ)/def2-SVP / Hartree |             |             |            | -2752.99978 |
| E(el) PBE0-D3(BJ)/def2-TZVPP / Hartree   |             |             |            | -2755.83628 |
| Thermal corrections / Hartree            |             |             |            |             |
| ZPVE:                                    | 1.028371    |             | E(therm.): | 1.086482    |
| H(corr.):                                | 1.087426    |             | G(corr.):  | 0.93208     |
| Imaginary frequencies:                   | 0           |             |            |             |

### **(E,Z,Z,Z)-3**

|   |             |             |             |
|---|-------------|-------------|-------------|
| H | -8.46153375 | -1.66442911 | -2.26411095 |
| H | -5.27801038 | -0.15121587 | -0.93512463 |
| H | -3.38865973 | 0.17246194  | -2.48588222 |
| H | -7.98827658 | -3.98171493 | -1.62477293 |
| C | -8.15522636 | -1.32925982 | -1.26263352 |
| C | -5.05961158 | -0.92154062 | -1.67952183 |
| C | -3.99171534 | -0.73580229 | -2.54271006 |
| H | -4.02889193 | 4.58707655  | -2.08135745 |
| H | -9.03506092 | -1.37887337 | -0.6022725  |
| H | 7.74218631  | -4.02266827 | -1.13793818 |
| C | -7.55240455 | -3.66217014 | -0.66643889 |
| H | -7.84080519 | -0.27929864 | -1.34940562 |
| H | -8.34349841 | -3.71992959 | 0.09531866  |
| H | -2.00954751 | 3.73570137  | -2.50439073 |
| H | -0.15682481 | 0.83410528  | -3.27398006 |
| H | 4.5355558   | -3.17355546 | -0.87267635 |
| C | -4.17849421 | 3.9131058   | -1.22416309 |
| N | 5.06175038  | -4.88204812 | 1.19480721  |
| N | 6.24455894  | -4.65229351 | 0.90112604  |

|   |             |             |             |
|---|-------------|-------------|-------------|
| H | -4.00989339 | 2.88048662  | -1.56299673 |
| H | 0.40856561  | 3.30700098  | -2.8827871  |
| C | -7.0211712  | -2.22576536 | -0.74761538 |
| H | -5.22990745 | 3.99354887  | -0.9120289  |
| C | -5.84346715 | -2.08643383 | -1.71828054 |
| C | 3.86345995  | -3.08055571 | -0.018384   |
| C | 7.51727705  | -3.16048301 | -0.50650957 |
| C | -1.31330902 | 3.83160372  | -1.6703979  |
| H | 0.89494098  | 1.03128838  | -1.050111   |
| C | -0.27409635 | 0.03747725  | -2.53675231 |
| C | -3.68640869 | -1.71828792 | -3.4952674  |
| C | 0.04081452  | 3.59458983  | -1.89538873 |
| C | 4.04779879  | -3.89023199 | 1.11156269  |
| N | -2.67814559 | -1.53708279 | -4.47535555 |
| H | -6.76768995 | -4.38152065 | -0.39221706 |
| C | 6.71501296  | -3.34261089 | 0.61912158  |
| C | 0.32102379  | 0.1352847   | -1.28156904 |
| H | 2.69636532  | -1.53616464 | -0.93216613 |
| C | 2.83050034  | -2.15827154 | -0.04388148 |
| N | -1.53011337 | -1.16424481 | -4.19956631 |
| H | -3.26491783 | 6.3988741   | -0.54606689 |
| H | 8.56431083  | -1.76617082 | -1.75245091 |
| C | 7.97821775  | -1.88694749 | -0.84028103 |
| C | -5.53713017 | -3.04715198 | -2.68607632 |
| C | -3.26477588 | 4.29058002  | -0.05118539 |
| C | -1.03538809 | -1.0818471  | -2.87194864 |
| H | 2.46880889  | 0.60353177  | 0.48322383  |
| C | -1.78094866 | 4.13656803  | -0.38971138 |
| C | -4.48979019 | -2.85531245 | -3.58465404 |
| C | -3.52840438 | 5.7580062   | 0.30779671  |
| C | -6.52095224 | -1.79714686 | 0.63193109  |
| H | -4.59092843 | 5.92636813  | 0.54101289  |
| C | 3.13880222  | -3.8035917  | 2.16623022  |
| H | -7.83717752 | -0.09931732 | 0.88558481  |
| C | 0.95724759  | 3.67346642  | -0.8452274  |
| C | 1.95986718  | -1.99661476 | 1.04593477  |
| C | -7.00790269 | -0.67211644 | 1.30198265  |
| N | 2.26239282  | 3.22468115  | -1.10782138 |
| H | 3.25595068  | -4.47804876 | 3.01717355  |
| C | 1.68070831  | 0.44683478  | 1.23250536  |
| C | 0.22611221  | -0.90602754 | -0.35438631 |
| C | 6.47527516  | -2.25749876 | 1.47398122  |
| C | 2.12411486  | -2.84776468 | 2.14236567  |
| H | -5.07564412 | -3.40127965 | 0.7336405   |
| C | -5.47859942 | -2.51804218 | 1.23519586  |
| H | 8.12308559  | 0.39123192  | -2.56302221 |
| H | -6.1283433  | -3.9610208  | -2.76032461 |

|   |             |             |             |
|---|-------------|-------------|-------------|
| C | -3.56252783 | 3.33699669  | 1.1095442   |
| H | -4.27100985 | -3.59415857 | -4.35856376 |
| H | -2.74011503 | 1.63215584  | 0.05739684  |
| C | 0.92440871  | -0.86989069 | 1.00563475  |
| C | 7.69335324  | -0.78297597 | -0.03306937 |
| C | -0.83917591 | 4.26449728  | 0.64780345  |
| C | -1.14071525 | -2.13705183 | -1.95334398 |
| H | 2.16746697  | 0.42572772  | 2.21823346  |
| C | -3.22903784 | 1.97949907  | 0.97194767  |
| H | -2.92822133 | 6.08666827  | 1.1683427   |
| C | 0.50899274  | 4.04390414  | 0.43304161  |
| H | 5.88336096  | -2.39775843 | 2.37977405  |
| C | 4.56654477  | 1.75636491  | -1.26809267 |
| H | 0.99576567  | 1.30828748  | 1.2068865   |
| H | 3.75652658  | 1.44798675  | -1.93115555 |
| C | 8.77406964  | 0.75620692  | -1.75616116 |
| C | -4.12826706 | 3.74935827  | 2.3187464   |
| C | 5.78366545  | 1.10029594  | -1.260944   |
| C | 6.96284354  | -1.00440342 | 1.14561782  |
| C | -0.50375609 | -2.04692142 | -0.72466166 |
| N | 3.09854302  | 3.44691523  | -0.20984348 |
| H | -4.38714259 | 4.79724698  | 2.47606617  |
| C | 4.3407909   | 2.81456403  | -0.37098395 |
| H | 5.92873226  | 0.24089167  | -1.92040929 |
| H | 1.45224517  | -2.77717662 | 2.99900539  |
| C | -6.42224734 | -0.22567546 | 2.48326985  |
| C | 6.82155079  | 1.47866099  | -0.38855518 |
| H | 9.71346905  | 0.18358473  | -1.78644398 |
| C | 8.10958789  | 0.65029739  | -0.37852498 |
| C | 5.36478742  | 3.20860245  | 0.49207009  |
| C | -4.91963284 | -2.11507366 | 2.43926871  |
| C | 6.59683236  | 2.55780621  | 0.4702301   |
| H | -1.18833041 | 4.49128479  | 1.65856992  |
| H | -1.700561   | -3.0357182  | -2.21780045 |
| C | -3.48174475 | 1.06399469  | 1.9808263   |
| H | -6.78399812 | 0.68210529  | 2.96969075  |
| H | 9.01291012  | 1.80801956  | -1.97078961 |
| H | 5.16668519  | 4.02450719  | 1.19029312  |
| C | -5.34895216 | -0.92538087 | 3.03487051  |
| C | -4.34231311 | 2.84643327  | 3.35950487  |
| H | 1.23590468  | 4.09789049  | 1.24482974  |
| C | -0.13587835 | -0.99640903 | 2.10623673  |
| H | 7.37639296  | 2.88450104  | 1.15936856  |
| H | -3.21874774 | 0.01563145  | 1.83862861  |
| C | -4.05376373 | 1.49288026  | 3.18888439  |
| H | -4.10702318 | -2.67923346 | 2.90219307  |
| H | -0.55695809 | -2.89620569 | -0.03868424 |

|                                          |             |             |            |             |          |
|------------------------------------------|-------------|-------------|------------|-------------|----------|
| H                                        | 6.73230371  | -0.16065099 | 1.80096779 |             |          |
| H                                        | 0.31614805  | -0.92562514 | 3.10665205 |             |          |
| H                                        | -0.69060047 | -1.94422531 | 2.04681436 |             |          |
| H                                        | -4.74359592 | 3.18129791  | 4.31847014 |             |          |
| H                                        | -0.85702283 | -0.17195382 | 2.01385436 |             |          |
| C                                        | 9.11681203  | 1.13706656  | 0.66970728 |             |          |
| N                                        | -4.72263553 | -0.48890467 | 4.2310956  |             |          |
| H                                        | 10.0076376  | 0.49272661  | 0.64904556 |             |          |
| N                                        | -4.21261173 | 0.6371881   | 4.31448239 |             |          |
| H                                        | 8.70697719  | 1.10078188  | 1.68893039 |             |          |
| H                                        | 9.43923392  | 2.16906858  | 0.4623304  |             |          |
| E(el) / Hartree :                        |             |             |            | -2752.92783 |          |
| E(el) SMD-PBE0-D3(BJ)/def2-SVP / Hartree |             |             |            | -2752.99242 |          |
| E(el) PBE0-D3(BJ)/def2-TZVPP / Hartree   |             |             |            | -2755.82851 |          |
| Thermal corrections / Hartree            |             |             |            |             |          |
| ZPVE:                                    |             |             | 1.02858    | E(therm.):  | 1.086239 |
| H(corr.):                                |             |             | 1.087183   | G(corr.):   | 0.935186 |
| Imaginary frequencies:                   |             |             | 0          |             |          |

### **(Z,Z,Z,Z)-3**

|   |             |             |             |  |  |
|---|-------------|-------------|-------------|--|--|
| H | -4.01223672 | 2.11192916  | 0.83515622  |  |  |
| H | -2.51353816 | 4.83807371  | -1.2283318  |  |  |
| H | -4.11725321 | -0.18923335 | 1.72303359  |  |  |
| H | -7.70952636 | -1.5992055  | 2.49169438  |  |  |
| H | -0.40818719 | 3.90423886  | -2.14466305 |  |  |
| C | -4.81990836 | 1.44322624  | 0.53105984  |  |  |
| C | -4.88931988 | 0.15003989  | 1.02861885  |  |  |
| H | 1.20107664  | 3.28089517  | -3.46969762 |  |  |
| C | -2.50512551 | 3.85605386  | -1.7060528  |  |  |
| H | -6.16701691 | -1.25098055 | 3.28358373  |  |  |
| C | -6.68661825 | -1.97450715 | 2.6396675   |  |  |
| N | 5.01563902  | 4.3418808   | 0.47746093  |  |  |
| H | 7.27694931  | 1.96576     | -1.20071917 |  |  |
| C | -1.32940661 | 3.32635051  | -2.23497078 |  |  |
| N | 5.83368445  | 3.4892027   | 0.10340096  |  |  |
| H | -6.74559688 | -2.93894935 | 3.16817637  |  |  |
| C | 1.19891522  | 2.21503718  | -3.19699452 |  |  |
| H | 1.37198078  | 2.13439447  | -2.11558962 |  |  |
| H | 2.98506615  | 3.20952307  | -0.87988276 |  |  |
| N | -4.87219526 | 3.81676688  | -1.3357862  |  |  |
| N | -5.83284644 | 3.25061649  | -0.79709615 |  |  |
| C | -5.79941171 | 1.90473642  | -0.35645413 |  |  |
| C | 6.6061199   | 1.37741253  | -0.57145138 |  |  |
| H | -0.37878115 | 2.85176347  | -5.3131644  |  |  |
| C | 3.72713525  | 4.03855043  | 0.97057763  |  |  |
| C | -3.70507005 | 3.14506552  | -1.78413431 |  |  |



|   |             |             |             |
|---|-------------|-------------|-------------|
| C | 2.74427928  | 3.46394737  | 0.15429785  |
| H | 2.04851432  | 1.73690142  | -3.70558219 |
| H | -7.89682602 | -2.79923245 | 0.42402238  |
| C | -5.91481871 | -0.73072852 | 0.64991395  |
| C | 5.68612306  | 2.07789654  | 0.21679803  |
| C | -5.99623748 | -2.13056351 | 1.27594149  |
| C | -1.33279784 | 2.09915045  | -2.90527026 |
| H | -1.25852172 | 3.41840273  | 0.72732502  |
| C | -0.29974821 | 1.77163906  | -5.12285281 |
| C | -6.83833694 | -3.09727485 | 0.43285966  |
| C | 3.40426869  | 4.40900888  | 2.27571238  |
| C | -0.10527051 | 1.5281799   | -3.61967423 |
| H | 7.42173615  | -0.51104067 | -1.1649571  |
| C | 1.49633911  | 3.17779343  | 0.68444304  |
| C | 6.68291771  | -0.01128771 | -0.53774297 |
| H | -4.35621887 | -3.0794376  | -0.70304023 |
| H | 4.16004389  | 4.90494896  | 2.88805687  |
| H | -6.78260483 | -4.10809284 | 0.86246948  |
| H | 0.55375106  | 1.38474248  | -5.70084143 |
| H | 0.75189921  | 2.68816611  | 0.05098918  |
| H | -1.2522916  | 4.72275202  | 1.92719453  |
| C | -6.85592363 | 1.06083912  | -0.7035386  |
| C | -1.30224306 | 3.63124221  | 1.80349099  |
| C | -6.89186177 | -0.24764143 | -0.22803673 |
| C | -3.71998403 | 1.90875444  | -2.44914076 |
| C | -3.86335986 | -3.08111916 | 0.27122753  |
| H | -1.76785306 | 1.3011007   | 1.00782307  |
| C | 2.15086626  | 4.09589247  | 2.79999648  |
| C | -4.57276131 | -2.67354404 | 1.41195684  |
| C | -2.5514956  | 1.40802337  | -2.99954316 |
| C | 1.18317492  | 3.45195219  | 2.02565871  |
| C | 4.84387605  | 1.33771255  | 1.07125147  |
| H | -1.21960732 | 1.30263839  | -5.5002903  |
| H | 0.24744622  | 0.42728591  | -1.15987741 |
| H | -6.49704747 | -3.15171994 | -0.61030619 |
| H | -2.28061049 | 3.29343745  | 2.17944886  |
| H | 6.92920379  | -2.66374229 | -1.49632877 |
| C | -0.00073995 | 0.04192223  | -3.27797856 |
| H | 8.03853517  | -2.48845975 | -0.11160845 |
| H | 4.12948351  | 1.82836464  | 1.72846836  |
| C | 5.85120395  | -0.75320957 | 0.30537001  |
| C | -1.0168243  | 0.76118525  | 1.58551235  |
| H | 1.94184699  | 4.35512094  | 3.83881753  |
| C | 0.19036108  | -0.33608647 | -1.93970113 |
| C | -0.16007031 | 2.97408012  | 2.58480464  |
| H | -7.63919985 | 1.43877275  | -1.3641651  |
| C | 7.05655564  | -2.87452157 | -0.42556972 |

|   |             |             |             |
|---|-------------|-------------|-------------|
| H | -1.63564061 | -1.1010529  | 0.73900855  |
| H | -4.65076491 | 1.35028682  | -2.55145472 |
| C | 4.92875477  | -0.04609465 | 1.09491922  |
| C | -2.52828345 | -3.46150341 | 0.33650477  |
| H | -7.71601828 | -0.89132628 | -0.53929179 |
| C | -3.90228134 | -2.71123301 | 2.63917907  |
| H | -1.9837036  | -3.77246759 | -0.55848279 |
| C | -0.94466562 | -0.62008752 | 1.42842252  |
| H | -2.57962565 | 0.44599992  | -3.51729688 |
| H | -4.42343604 | -2.44435851 | 3.55891498  |
| C | -0.14634758 | 1.4499372   | 2.43497025  |
| C | -0.11738708 | -0.97335432 | -4.23153606 |
| C | 5.93075754  | -2.27718443 | 0.42902676  |
| H | -0.34522114 | 4.41985052  | 4.20838388  |
| H | -0.28124441 | -0.726133   | -5.28108677 |
| H | 7.06533527  | -3.96743508 | -0.30508544 |
| C | -0.34478651 | 3.32880025  | 4.06433968  |
| C | 0.3041554   | -1.66610642 | -1.57092535 |
| C | -1.85073102 | -3.35926397 | 1.55526814  |
| H | 4.04985883  | -3.85545128 | 1.79642582  |
| C | -2.55092872 | -3.03195668 | 2.71583781  |
| H | 4.24801792  | -0.59790305 | 1.74795276  |
| C | 4.60013102  | -2.86530844 | -0.04876834 |
| C | 3.77726414  | -3.65263874 | 0.76041703  |
| H | 0.48579952  | -1.9348996  | -0.53136872 |
| C | 0.031979    | -1.35786404 | 2.11390939  |
| H | 7.18604988  | -2.16245866 | 2.19145494  |
| H | -1.31100682 | 2.94025221  | 4.41781345  |
| C | 0.82846047  | 0.70183962  | 3.11406497  |
| C | 6.23513503  | -2.62663494 | 1.89175278  |
| H | 0.43854778  | 2.89924049  | 4.70398069  |
| C | -0.05796704 | -2.31694892 | -3.86545718 |
| C | 4.19578332  | -2.64067593 | -1.37522746 |
| C | 0.18990363  | -2.67134877 | -2.53999357 |
| C | 2.5990464   | -4.20641617 | 0.26644938  |
| N | -0.45914229 | -3.61448151 | 1.60124019  |
| H | -2.02567869 | -2.99758294 | 3.6725233   |
| H | 4.81766418  | -2.02589826 | -2.03084126 |
| H | 1.95406066  | -4.82234176 | 0.8946823   |
| C | 0.93077935  | -0.66894369 | 2.9413749   |
| N | 0.35087996  | -2.73177098 | 1.92423794  |
| H | 6.33180764  | -3.7150316  | 2.02159788  |
| H | 1.55355372  | 1.21322852  | 3.75165973  |
| C | 3.0163319   | -3.16828903 | -1.87449857 |
| H | 5.45861712  | -2.26832576 | 2.58137017  |
| C | 2.19503098  | -3.94521212 | -1.04264238 |
| H | -0.18825747 | -3.10786188 | -4.60723886 |

|                                          |            |             |             |                     |
|------------------------------------------|------------|-------------|-------------|---------------------|
| N                                        | 0.16509986 | -4.05036944 | -2.20552698 |                     |
| H                                        | 2.73044112 | -2.98148893 | -2.91041105 |                     |
| N                                        | 1.00999502 | -4.5912319  | -1.47792491 |                     |
| H                                        | 1.72096745 | -1.24449962 | 3.428388    |                     |
| E(el) / Hartree :                        |            |             |             | -2752.90955         |
| E(el) SMD-PBE0-D3(BJ)/def2-SVP / Hartree |            |             |             | -2752.97379         |
| E(el) PBE0-D3(BJ)/def2-TZVPP / Hartree   |            |             |             | -2755.80926         |
| Thermal corrections / Hartree            |            |             |             |                     |
| ZPVE:                                    | 1.02893    |             |             | E(therm.): 1.086331 |
| H(corr.):                                | 1.087275   |             |             | G(corr.): 0.937866  |
| Imaginary frequencies:                   | 0          |             |             |                     |

### TS (*E,E,E,Z*) → (*E,E,E,E*)

|   |             |             |             |
|---|-------------|-------------|-------------|
| H | -7.97896657 | 4.29401859  | 3.04036124  |
| H | -6.73010365 | 5.55610336  | 3.12376686  |
| H | -8.87415441 | 5.06317761  | 0.80377562  |
| H | -7.84431582 | 6.48459281  | 1.07671117  |
| C | -6.95379791 | 4.55251272  | 2.73336797  |
| C | -7.87581845 | 5.48468815  | 0.61698043  |
| H | -6.25755771 | 3.84425736  | 3.20636189  |
| H | -7.89233266 | 2.23437496  | 2.36986738  |
| C | -6.80933335 | 4.54704974  | 1.20378873  |
| H | -7.75703142 | 5.59855911  | -0.47071231 |
| H | -6.57330266 | -6.75591352 | 1.24516466  |
| C | -7.60606717 | 2.09890799  | 1.32523546  |
| H | -5.89659044 | 7.0982604   | 0.52764654  |
| H | -5.06871428 | -7.59236752 | 1.68278373  |
| C | -7.03016381 | 3.15484798  | 0.6128604   |
| C | -5.4809703  | -6.6444775  | 1.30567701  |
| C | -5.38959587 | 5.02607968  | 0.89146041  |
| C | -5.09507585 | 6.36124258  | 0.59240794  |
| H | -5.26319282 | -5.85348492 | 2.03803622  |
| C | -7.81793673 | 0.8452496   | 0.76517156  |
| H | -8.25607242 | 0.03987153  | 1.35655268  |
| H | -6.2075889  | -7.82826429 | -0.99800454 |
| C | -4.31835986 | 4.11899364  | 0.9718551   |
| C | -6.68981602 | 2.89800075  | -0.72505414 |
| C | -3.78359204 | 6.77814826  | 0.37837126  |
| H | -4.55048055 | -8.36370789 | -0.64676609 |
| C | -5.15246525 | -7.51494032 | -1.0018144  |
| H | -4.52804835 | 3.073992    | 1.21280513  |
| H | -3.54911378 | 7.82055543  | 0.15219187  |
| C | -4.92037    | -6.30492435 | -0.08434926 |
| H | -3.04866169 | -6.87975136 | 1.90517157  |
| H | -6.22756794 | 3.69099954  | -1.32003987 |
| C | -7.48418679 | 0.60691811  | -0.59263001 |

C -5.66211252 -5.05762003 -0.56539881  
C -3.01422514 4.51545263 0.73001773  
C -6.68172918 -5.11399602 -1.5201527  
C -6.91227238 1.67604189 -1.33441858  
H -6.92922129 -6.05809665 -2.00604693  
C -2.73644027 5.85578486 0.42018947  
C -5.37137952 -3.81319653 0.02553325  
C -7.40758042 -3.97414872 -1.85661398  
C -2.60135669 -6.43532887 1.0150213  
H -4.85254856 -7.30274377 -2.03838948  
H -4.56397703 -3.74918999 0.75976544  
C -6.08429485 -2.67200214 -0.30537532  
C -7.11794772 -2.75672973 -1.24699262  
H -8.21707306 -4.00403302 -2.58921358  
C -3.41367379 -6.04585903 -0.05991927  
N -7.71595335 -0.56883243 -1.15308194  
N -7.95744418 -1.66180592 -1.62985335  
H -2.18404895 3.80907478 0.77618045  
N -1.43882718 6.33549594 0.16929777  
H -5.85974639 -1.71098087 0.16416091  
H -6.64616758 1.51594546 -2.38002413  
C -1.2228786 -6.27197984 0.97547691  
H -0.5878362 -6.57683568 1.80847933  
C -2.79558286 -5.46679093 -1.1772214  
H 0.58019644 7.72776033 0.73246239  
N -0.62545743 5.45724981 -0.17707736  
H -3.4084574 -5.14057962 -2.0215676  
C -0.61743882 -5.70325618 -0.15207578  
C 1.24206062 7.05131952 0.18877431  
C -1.41886974 -5.29245596 -1.22383082  
C 0.70492665 5.87313526 -0.34259995  
N 0.76648344 -5.49599172 -0.28996522  
C 2.60131782 7.31842022 0.05178138  
H 3.00485807 8.22611635 0.50368644  
H -0.93021651 -4.83942583 -2.08886271  
C 1.54078087 4.9907513 -1.03718163  
H 2.79636525 -4.59365117 -1.32186835  
N 1.47026779 -5.95560351 0.6306776  
H 1.10422733 4.07253899 -1.43522425  
C 3.45061395 6.4340917 -0.62624779  
H 4.73385765 5.29836028 1.56434897  
H 5.25229395 7.52730768 1.23400442  
C 2.88703475 5.2784682 -1.18905413  
C 3.44119744 -5.00004838 -0.54162849  
H 5.07065333 8.7258801 -0.07160874  
C 2.85105406 -5.72668086 0.50613642  
C 5.49004934 7.74067967 0.18212327

|                                          |            |             |             |
|------------------------------------------|------------|-------------|-------------|
| H                                        | 5.52097542 | 2.99829059  | 2.11175116  |
| C                                        | 5.35055941 | 4.75015244  | 0.84803439  |
| C                                        | 4.96295907 | 6.65298173  | -0.76126364 |
| C                                        | 5.77587134 | 3.46876328  | 1.15998181  |
| C                                        | 4.80883594 | -4.7981559  | -0.55015747 |
| H                                        | 5.2556623  | -4.20262935 | -1.3506711  |
| H                                        | 3.53005579 | 4.56765221  | -1.71344974 |
| C                                        | 5.6246141  | 5.31937667  | -0.40434018 |
| H                                        | 6.5840099  | 7.80922714  | 0.09152014  |
| C                                        | 3.66210401 | -6.24921053 | 1.5151678   |
| H                                        | 4.72521815 | 8.02848552  | -2.4164436  |
| C                                        | 5.25230907 | 7.08712272  | -2.20355348 |
| H                                        | 7.47995802 | -4.97253123 | 2.57463311  |
| H                                        | 3.18430723 | -6.81052007 | 2.32086733  |
| C                                        | 6.49117297 | 2.7145075   | 0.22122454  |
| C                                        | 5.63773898 | -5.30807769 | 0.46767417  |
| N                                        | 6.7130599  | 1.37034281  | 0.55902903  |
| H                                        | 4.90561684 | 6.34153852  | -2.93339161 |
| C                                        | 5.04085937 | -6.04375625 | 1.49410401  |
| C                                        | 6.40880341 | 4.58497162  | -1.3047978  |
| H                                        | 6.18009788 | -0.64536601 | 1.79241928  |
| C                                        | 7.88146998 | -5.45595789 | 1.67262703  |
| H                                        | 6.12166364 | -3.12254057 | 2.02923883  |
| C                                        | 6.69208656 | -1.29217806 | 1.07899433  |
| C                                        | 6.67215894 | -2.66846244 | 1.20102389  |
| H                                        | 7.82471863 | -6.54658254 | 1.80994154  |
| C                                        | 6.83692942 | 3.29681498  | -1.00448426 |
| H                                        | 6.32871381 | 7.2572343   | -2.3613929  |
| C                                        | 7.14025963 | -5.01693938 | 0.40399828  |
| N                                        | 7.28695391 | 0.67758775  | -0.30395879 |
| C                                        | 7.33793754 | -0.69833132 | -0.01860191 |
| C                                        | 7.29253196 | -3.50192494 | 0.25168278  |
| H                                        | 6.65655653 | 5.00425634  | -2.28104946 |
| H                                        | 8.94328469 | -5.18151721 | 1.59155308  |
| H                                        | 5.64723827 | -6.45595881 | 2.3015821   |
| C                                        | 7.97279087 | -2.89833587 | -0.80849968 |
| C                                        | 7.99113651 | -1.51082647 | -0.94658342 |
| H                                        | 7.40041935 | 2.70095132  | -1.72420366 |
| H                                        | 8.47292117 | -3.50865736 | -1.56149275 |
| H                                        | 8.48526572 | -1.03183761 | -1.79454053 |
| C                                        | 7.72692408 | -5.79116309 | -0.78293212 |
| H                                        | 7.55529115 | -6.86811556 | -0.64120929 |
| H                                        | 7.26002267 | -5.50230183 | -1.73536504 |
| H                                        | 8.81269814 | -5.62938724 | -0.86512083 |
| E(el) / Hartree :                        |            |             | -2752.91198 |
| E(el) SMD-PBE0-D3(BJ)/def2-SVP / Hartree |            |             | -2752.97572 |
| E(el) PBE0-D3(BJ)/def2-TZVPP / Hartree   |            |             | -2755.80953 |

Thermal corrections / Hartree

|                        |          |            |          |
|------------------------|----------|------------|----------|
| ZPVE:                  | 1.026636 | E(therm.): | 1.084814 |
| H(corr.):              | 1.085758 | G(corr.):  | 0.930503 |
| Imaginary frequencies: | 1        |            |          |

**TS (E,E,Z,Z) → (E,E,E,Z)**

|   |             |             |             |
|---|-------------|-------------|-------------|
| H | 3.30935706  | -3.48759953 | 4.02320361  |
| H | 5.03701111  | -3.11759949 | 3.84134794  |
| C | 4.08032102  | -3.18244293 | 3.30099226  |
| H | 4.03617638  | -5.86129271 | 3.59168914  |
| H | 3.81721419  | -2.17986172 | 2.93316023  |
| H | 5.68323666  | -5.4197096  | 3.09099386  |
| C | 4.64910202  | -5.53851676 | 2.73646128  |
| C | 4.14821818  | -4.20682216 | 2.15807497  |
| H | 6.18487302  | -2.2946097  | 2.21640517  |
| H | 2.26051486  | -6.25633722 | 2.40505309  |
| C | 1.89966199  | -5.41181619 | 1.81633269  |
| C | 2.74157018  | -4.3178426  | 1.56893783  |
| H | 4.64375151  | -6.33774247 | 1.98098336  |
| C | 6.12162747  | -2.82361755 | 1.26458035  |
| H | 4.04543261  | 2.04423549  | 2.53966212  |
| C | 0.59817653  | -5.44768239 | 1.33065929  |
| C | 2.23968865  | -3.26083561 | 0.7961932   |
| C | 5.13205181  | -3.79190734 | 1.06347338  |
| H | 6.12154146  | 1.99645369  | 1.13499157  |
| H | -0.06281976 | -6.29241665 | 1.53061518  |
| H | 2.88270894  | -2.40471769 | 0.57604162  |
| H | 7.90349571  | 3.76228619  | 0.62413894  |
| C | 0.94418723  | -3.28956768 | 0.30076249  |
| C | 0.10629891  | -4.37808924 | 0.57292389  |
| C | 4.12668098  | 2.63365167  | 1.62366089  |
| H | -3.95151953 | -6.64640555 | 1.19970242  |
| C | 7.04550783  | -2.51071545 | 0.27169567  |
| H | 7.80973998  | -1.75508327 | 0.45890983  |
| C | 5.27277438  | 2.61872752  | 0.84053402  |
| H | 7.24919348  | 5.21671951  | -0.16095525 |
| C | 7.6671622   | 4.21707923  | -0.34893692 |
| N | -1.2004294  | -4.28964198 | 0.06597075  |
| H | 0.5423876   | -2.46894364 | -0.29705092 |
| C | 5.11036871  | -4.45922687 | -0.1705556  |
| C | -4.26903273 | -5.89074174 | 0.47800276  |
| H | 8.60450026  | 4.34796459  | -0.91018413 |
| N | 1.88292298  | 3.33999522  | 2.09135012  |
| H | -6.35469753 | -6.38098512 | 0.6093413   |
| H | -0.04837237 | 6.20996527  | 2.9681377   |
| N | -1.98489786 | -5.19326264 | 0.41657424  |

|   |             |             |             |
|---|-------------|-------------|-------------|
| C | 3.03258947  | 3.41108983  | 1.23941389  |
| N | 0.92496313  | 4.02922341  | 1.7936121   |
| C | -5.61373855 | -5.7321291  | 0.14021489  |
| H | 4.34841333  | -5.22097894 | -0.35428147 |
| C | 7.00731955  | -3.18258214 | -0.9548115  |
| C | 5.35271427  | 3.37473853  | -0.33852468 |
| H | -8.31273006 | -5.08414082 | 0.8488276   |
| C | -3.29824378 | -5.04766634 | -0.06514228 |
| C | 6.65451512  | 3.37472539  | -1.14001059 |
| C | 6.04730901  | -4.18236837 | -1.15472059 |
| H | -7.15053782 | -3.24055427 | 1.33833997  |
| C | -0.61630931 | 5.8406131   | 2.11335343  |
| C | 7.1318917   | 1.93693891  | -1.35119895 |
| C | 8.46968621  | 1.55929796  | -1.20039354 |
| H | 9.21150773  | 2.28368234  | -0.86177169 |
| H | -8.36821962 | -6.30913196 | -0.4426287  |
| C | -8.4622601  | -5.23341376 | -0.22959992 |
| C | -0.15764816 | 4.69257112  | 1.42082797  |
| C | 6.22502741  | 0.96487173  | -1.80179872 |
| C | 8.89296163  | 0.26885692  | -1.50611167 |
| C | 3.09101705  | 4.17198212  | 0.07045221  |
| H | -6.97472461 | -0.81558    | 1.86870038  |
| N | 7.99356357  | -3.04214295 | -1.96384639 |
| H | 5.17373209  | 1.23416136  | -1.93491027 |
| H | 9.9458279   | -0.00998166 | -1.42638701 |
| C | 4.24238787  | 4.14815081  | -0.70718562 |
| C | 7.97124133  | -0.6965798  | -1.91428155 |
| C | 6.62542891  | -0.33625126 | -2.07069943 |
| C | -7.35683033 | -2.50051199 | 0.56159946  |
| C | -6.012525   | -4.73790446 | -0.75592289 |
| H | -2.09929414 | 7.35521816  | 2.27900445  |
| C | -1.7847465  | 6.47767846  | 1.71028938  |
| C | 6.4871313   | 4.00688379  | -2.52968476 |
| C | -3.68055741 | -4.08113013 | -1.01010675 |
| H | -9.4923555  | -4.93112021 | -0.46842887 |
| C | -7.24813225 | -1.15339505 | 0.86707384  |
| H | 6.23160552  | 5.07529352  | -2.46086151 |
| N | 8.47712155  | -1.9586825  | -2.31479296 |
| H | 6.05590761  | -4.73185128 | -2.0984013  |
| H | 5.90101344  | -1.07673182 | -2.41531116 |
| C | -7.47915751 | -4.41696897 | -1.07386605 |
| H | 7.43253537  | 3.9242333   | -3.08481934 |
| C | -5.01288761 | -3.93956753 | -1.34475253 |
| H | 2.22642277  | 4.77138525  | -0.22532814 |
| C | -0.91428075 | 4.24246053  | 0.30331995  |
| C | -7.62780981 | -2.92676737 | -0.74668207 |
| H | -4.62597027 | 4.80419598  | 2.01684994  |

|   |             |             |             |
|---|-------------|-------------|-------------|
| H | -5.98990572 | 2.74975828  | 1.68865667  |
| H | -2.91172082 | -3.43510294 | -1.43530215 |
| H | 4.26947763  | 4.74262393  | -1.62101128 |
| H | -4.58972148 | 7.11700146  | 2.23746087  |
| H | 5.70945778  | 3.4973673   | -3.11726564 |
| H | -0.57695791 | 3.36499803  | -0.25059475 |
| C | -2.56539248 | 6.01461297  | 0.64688274  |
| C | -7.3979581  | -0.18798018 | -0.13614528 |
| C | -5.11186901 | 4.62217206  | 1.05486799  |
| H | -7.60306955 | -5.80575295 | -2.72973103 |
| C | -5.86226842 | 3.47522738  | 0.88439637  |
| C | -7.74678157 | -4.73030302 | -2.55020435 |
| C | -2.08890202 | 4.88546716  | -0.03862762 |
| N | -7.03110141 | 1.11868184  | 0.22262463  |
| C | -4.44755263 | 7.61513375  | 1.26766538  |
| H | -5.30288771 | -3.15218605 | -2.04493222 |
| H | -3.78031086 | 8.47710899  | 1.41977503  |
| C | -7.87836091 | -1.94822073 | -1.7192258  |
| H | -8.78076636 | -4.47361696 | -2.82795783 |
| C | -3.88485531 | 6.65970224  | 0.20761335  |
| C | -7.76050132 | -0.59402475 | -1.42660307 |
| N | -7.00127628 | 1.95000851  | -0.70650137 |
| C | -4.88270144 | 5.51961351  | -0.00602771 |
| C | -6.41386668 | 3.18318576  | -0.3756623  |
| H | -7.0643293  | -4.18990786 | -3.22099439 |
| H | -5.42367483 | 8.00204377  | 0.9397341   |
| H | -2.66862179 | 4.48230912  | -0.87369381 |
| H | -8.11938456 | -2.24361757 | -2.74166071 |
| C | -3.6342743  | 7.46254365  | -1.074753   |
| H | -2.8886212  | 8.24579758  | -0.87500578 |
| H | -7.88651134 | 0.16819877  | -2.19720627 |
| C | -6.26225944 | 4.10287437  | -1.41434916 |
| C | -5.50734864 | 5.26095209  | -1.22844101 |
| H | -3.23843035 | 6.82735872  | -1.88062434 |
| H | -4.55333425 | 7.95175625  | -1.43488791 |
| H | -6.70246673 | 3.86260805  | -2.38458164 |
| H | -5.37011912 | 5.93974872  | -2.07100261 |

E(el) / Hartree : -2752.88796

E(el) SMD-PBE0-D3(BJ)/def2-SVP / Hartree -2752.95311

E(el) PBE0-D3(BJ)/def2-TZVPP / Hartree -2755.78655

Thermal corrections / Hartree

ZPVE: 1.026224 E(therm.): 1.08433

H(corr.): 1.085274 G(corr.): 0.929991

Imaginary frequencies: 1



**TS (E,Z,E,Z) → (E,E,E,Z)**

|   |             |             |             |
|---|-------------|-------------|-------------|
| H | -5.23734731 | 6.83604879  | 2.33377542  |
| H | -6.82107198 | 6.04414304  | 2.49824215  |
| C | -5.78190992 | 5.89518328  | 2.16662748  |
| H | -5.32092313 | 5.12299556  | 2.79986872  |
| H | -6.07245768 | 7.61167659  | 0.10696103  |
| H | 6.68579712  | 2.5988745   | 3.28963616  |
| C | -6.45744143 | 6.60489261  | -0.11808783 |
| H | -7.52512476 | 6.5882536   | 0.14434065  |
| C | -5.72199784 | 5.51778503  | 0.67877051  |
| C | -3.56830301 | 6.4484746   | -0.37346863 |
| H | -5.97341372 | -6.63493852 | 2.41037346  |
| C | -4.24132674 | 5.42656065  | 0.30327805  |
| H | -4.1077259  | 7.33710045  | -0.70316843 |
| C | 6.94151609  | 2.42967315  | 2.24155475  |
| N | 8.25342737  | 0.55333436  | 2.98532821  |
| C | -2.20289999 | 6.35747972  | -0.63195087 |
| H | -7.35463769 | 3.92372695  | 2.32324435  |
| C | -3.49782264 | 4.3002564   | 0.70403739  |
| N | 8.24077136  | -0.68554035 | 2.96280869  |
| H | -1.66850407 | 7.15507626  | -1.15244072 |
| H | -6.01614639 | -4.87421186 | 2.70219471  |
| C | -6.41067836 | -5.68369319 | 2.07111026  |
| H | 5.74048588  | 4.04502     | 1.49940211  |
| C | -1.47980024 | 5.23097258  | -0.23443796 |
| H | -7.49699581 | -5.73587824 | 2.23388994  |
| C | -2.14311631 | 4.19367125  | 0.44213468  |
| H | -3.90896746 | -5.86773057 | 2.24553945  |
| H | -4.01262739 | 3.48819973  | 1.22396959  |
| N | -0.10733562 | 5.23387461  | -0.52955348 |
| C | 6.42972275  | 3.23826712  | 1.23703923  |
| C | 7.7667877   | 1.34819434  | 1.91544269  |
| H | -6.37692342 | 6.43674601  | -1.20220316 |
| H | 5.73615414  | -0.33107171 | 1.88778892  |
| H | -1.56609831 | 3.32076564  | 0.75104242  |
| C | -7.20293014 | 3.50675336  | 1.32587144  |
| C | -6.40109956 | 4.17807621  | 0.39880214  |
| H | -1.51004973 | -5.56512066 | 1.68003146  |
| C | -3.63485931 | -5.54166147 | 1.2412444   |
| H | 6.70809716  | 5.78640253  | -0.0892665  |
| C | 7.59846282  | -1.43682693 | 1.94282603  |
| C | 6.29672625  | -1.17826687 | 1.48959269  |
| H | 2.08224437  | 6.31426215  | -0.77314998 |
| C | 2.61221847  | 5.36061897  | -0.77510116 |
| C | -2.28845985 | -5.37767855 | 0.93895821  |
| H | 4.54092731  | 6.22326903  | -1.10448561 |

|   |             |             |             |
|---|-------------|-------------|-------------|
| N | 0.48968444  | 4.15799457  | -0.32854614 |
| C | 3.98782358  | 5.29404093  | -0.960308   |
| H | -6.0523698  | -7.54242877 | 0.06710068  |
| C | -6.1244237  | -5.44037373 | 0.58255247  |
| C | 1.87539732  | 4.18846953  | -0.56688699 |
| H | -7.69255716 | -6.86175975 | 0.01581088  |
| C | 6.76455937  | 3.03091791  | -0.1095231  |
| C | -7.82523064 | 2.29723939  | 1.04243683  |
| C | 8.15423787  | 1.15888707  | 0.58620291  |
| C | -6.63565097 | -6.65200554 | -0.20853223 |
| C | 6.88906352  | 5.31028785  | -1.06395762 |
| H | -8.43603988 | 1.79684796  | 1.79499888  |
| H | 2.32063797  | -5.40450312 | 1.62050486  |
| C | -4.63116416 | -5.28293966 | 0.28973001  |
| C | -6.26006352 | 3.5758923   | -0.86095476 |
| C | 8.27258164  | -2.56252268 | 1.46805519  |
| C | 4.66612888  | 4.06761197  | -0.9516627  |
| C | 5.72450176  | -2.00126689 | 0.53160075  |
| C | 2.54089187  | 2.95666082  | -0.55489009 |
| H | 7.97390682  | 5.16397397  | -1.16921327 |
| H | 9.26212073  | -2.78790861 | 1.87124117  |
| C | -6.83036622 | -4.14163205 | 0.18867704  |
| C | 6.17592424  | 3.95543487  | -1.17622401 |
| C | 7.65948806  | 1.99835251  | -0.40749696 |
| H | 4.7069295   | -1.79209476 | 0.19186974  |
| C | 3.91315111  | 2.90040605  | -0.75402658 |
| H | -5.63321264 | 4.05865396  | -1.61661949 |
| N | 0.29133694  | -4.94734141 | 0.12609246  |
| C | 2.61650586  | -4.9717619  | 0.66262134  |
| H | 8.83120196  | 0.34313772  | 0.32679093  |
| H | 6.5656532   | 6.00304799  | -1.85568469 |
| H | -8.4497113  | -5.04148892 | -0.92878045 |
| C | -8.00585818 | -4.11356552 | -0.56659264 |
| H | 4.71794859  | -4.93046268 | 1.10703493  |
| C | -1.90575696 | -4.94682221 | -0.33720095 |
| H | 1.95145875  | 2.05387621  | -0.38123083 |
| C | -6.29345813 | -2.91884495 | 0.63407703  |
| H | -5.36874631 | -2.92443925 | 1.21671153  |
| C | 3.94648383  | -4.71019535 | 0.36478404  |
| C | 1.61298453  | -4.6728542  | -0.26693069 |
| C | -7.67019732 | 1.70220308  | -0.23475826 |
| H | -6.53185345 | -6.50660073 | -1.29351697 |
| C | 7.6979516   | -3.36444482 | 0.48496549  |
| C | -6.87023974 | 2.38010909  | -1.19489697 |
| H | 4.4216565   | 1.93295018  | -0.72930674 |
| C | 6.41914979  | -3.09421825 | -0.01101551 |
| N | -0.57850263 | -4.71174067 | -0.73464649 |

|                                          |             |             |             |             |
|------------------------------------------|-------------|-------------|-------------|-------------|
| C                                        | -4.23204047 | -4.8657539  | -0.98829929 |             |
| C                                        | -8.62771279 | -2.9040237  | -0.87250479 |             |
| C                                        | -6.89757049 | -1.71212869 | 0.32883412  |             |
| C                                        | -2.89097909 | -4.6986805  | -1.30042952 |             |
| H                                        | 7.97032959  | 1.82110612  | -1.43793407 |             |
| C                                        | -8.0717691  | -1.70605449 | -0.43419435 |             |
| H                                        | -9.54611214 | -2.86402675 | -1.46233347 |             |
| C                                        | 6.38954055  | 3.4162026   | -2.59794942 |             |
| C                                        | 4.31521725  | -4.14109279 | -0.86297423 |             |
| C                                        | 1.9668403   | -4.10861218 | -1.49864772 |             |
| H                                        | -6.47128807 | -0.76572747 | 0.67012808  |             |
| H                                        | 8.26364312  | -4.21939093 | 0.11214265  |             |
| N                                        | -8.23841953 | 0.54431235  | -0.52437348 |             |
| H                                        | -4.99102841 | -4.64379033 | -1.74288573 |             |
| C                                        | 5.7944075   | -3.89267295 | -1.15659376 |             |
| H                                        | 6.4337792   | -5.86292235 | -0.42858951 |             |
| H                                        | -6.73567306 | 1.9400234   | -2.18375209 |             |
| H                                        | 7.45825228  | 3.38199794  | -2.85944931 |             |
| C                                        | 3.30052674  | -3.84888921 | -1.78528635 |             |
| H                                        | 5.88913372  | 4.07672835  | -3.32084449 |             |
| N                                        | -8.76778369 | -0.51136191 | -0.81106984 |             |
| H                                        | 5.96818104  | 2.40733571  | -2.71748066 |             |
| H                                        | 1.17414392  | -3.87467377 | -2.21056721 |             |
| C                                        | 6.46203962  | -5.2625412  | -1.34944986 |             |
| H                                        | -2.57196641 | -4.3600313  | -2.28820287 |             |
| H                                        | 5.49734959  | -2.0978372  | -2.38343539 |             |
| C                                        | 6.00657727  | -3.0713331  | -2.43717616 |             |
| H                                        | 3.54955951  | -3.40140138 | -2.7482463  |             |
| H                                        | 7.51117509  | -5.15822808 | -1.66466056 |             |
| H                                        | 5.93312645  | -5.82300692 | -2.13398676 |             |
| H                                        | 7.08054148  | -2.87922327 | -2.57481036 |             |
| H                                        | 5.64417636  | -3.60913673 | -3.32665545 |             |
| E(el) / Hartree :                        |             |             |             | -2752.89719 |
| E(el) SMD-PBE0-D3(BJ)/def2-SVP / Hartree |             |             |             | -2752.96181 |
| E(el) PBE0-D3(BJ)/def2-TZVPP / Hartree   |             |             |             | -2755.79548 |
| Thermal corrections / Hartree            |             |             |             |             |
| ZPVE:                                    | 1.026466    | E(therm.):  | 1.084583    |             |
| H(corr.):                                | 1.085528    | G(corr.):   | 0.930067    |             |
| Imaginary frequencies:                   | 1           |             |             |             |

**TS (E,Z,Z,Z) → (E,E,Z,Z)**

|   |            |             |            |
|---|------------|-------------|------------|
| H | 8.45131328 | -3.6591516  | 2.1526977  |
| H | 6.97447731 | -0.73724914 | 1.53866994 |
| H | 5.37309327 | 0.57957379  | 2.89348858 |
| H | 6.65343022 | -5.35040657 | 1.60402012 |
| C | 8.29331136 | -3.20630424 | 1.16303704 |

|   |             |             |             |
|---|-------------|-------------|-------------|
| C | 6.1252217   | -1.24266889 | 2.00429     |
| C | 5.22416191  | -0.49176527 | 2.74452552  |
| H | 3.33469774  | 3.92109244  | 2.81321762  |
| H | 8.94388497  | -3.73001346 | 0.44657187  |
| H | -7.87770756 | -2.35722179 | 0.72644888  |
| C | 6.48899529  | -4.82894631 | 0.64825231  |
| H | 8.62267952  | -2.15916353 | 1.21752966  |
| H | 7.1401414   | -5.29012538 | -0.10841847 |
| H | 1.51957862  | 1.94214881  | 2.30810856  |
| H | 2.92801934  | 0.19252399  | 1.01520899  |
| H | -4.26647596 | -1.06591812 | -0.99035047 |
| C | 3.71052068  | 3.27637459  | 2.00562479  |
| N | -5.59432968 | -3.34879519 | -1.73754757 |
| N | -6.30144477 | -2.41590039 | -1.40694899 |
| H | 3.55407471  | 2.23341551  | 2.31221673  |
| H | -0.92492404 | 1.77163445  | 2.51000512  |
| C | 6.81982588  | -3.33686781 | 0.76717106  |
| H | 4.79396375  | 3.44438934  | 1.92859425  |
| C | 5.93367131  | -2.61576105 | 1.78719654  |
| C | -3.61572363 | -1.91303285 | -1.22098117 |
| C | -7.87458367 | -1.45327086 | 0.1163203   |
| C | 0.9019177   | 2.6329584   | 1.73688396  |
| H | 2.06147392  | -0.68773586 | -1.07505659 |
| C | 2.10397926  | -0.5212579  | 1.04423517  |
| C | 4.06052567  | -1.09564694 | 3.22816361  |
| C | -0.47675816 | 2.53319701  | 1.86866843  |
| C | -4.18120833 | -3.1384268  | -1.59986843 |
| N | 3.08965948  | -0.29086219 | 3.88209995  |
| H | 5.44969274  | -4.99909203 | 0.33350664  |
| C | -7.11828701 | -1.43066509 | -1.08252941 |
| C | 1.61037076  | -1.03808939 | -0.14713859 |
| H | -1.80031157 | -0.83170635 | -0.85915795 |
| C | -2.23841    | -1.7884109  | -1.15608705 |
| N | 1.91657281  | -0.27203259 | 3.48077581  |
| H | 3.16584086  | 5.78253476  | 0.99443338  |
| H | -9.03765848 | -0.34402221 | 1.50928409  |
| C | -8.52772625 | -0.30322502 | 0.54435211  |
| C | 4.83871023  | -3.22538347 | 2.40496218  |
| C | 2.99943495  | 3.62252056  | 0.6882957   |
| C | 1.5270821   | -0.89640632 | 2.26050243  |
| H | 0.00617108  | -0.7866581  | -2.61610852 |
| C | 1.48400951  | 3.59024277  | 0.89675097  |
| C | 3.89715029  | -2.47570156 | 3.10439809  |
| C | 3.47402487  | 5.02310629  | 0.25914888  |
| C | 6.5007239   | -2.65242078 | -0.56845125 |
| H | 4.57119646  | 5.03621668  | 0.1839421   |
| C | -3.36106599 | -4.2234398  | -1.8918754  |

|   |             |             |             |
|---|-------------|-------------|-------------|
| H | 8.53226156  | -2.25259015 | -1.19407898 |
| C | -1.32108618 | 3.40235741  | 1.17155784  |
| C | -1.39006297 | -2.87113818 | -1.45656201 |
| C | 7.47289938  | -2.12979765 | -1.4250307  |
| N | -2.69741479 | 3.17814164  | 1.32498304  |
| H | -3.82976474 | -5.16591942 | -2.18342781 |
| C | 0.43928573  | -1.79409553 | -2.69761747 |
| C | 0.56995084  | -1.97252454 | -0.16294341 |
| C | -7.19870862 | -0.26895982 | -1.89943235 |
| C | -1.97559183 | -4.08951671 | -1.8137143  |
| H | 4.36713896  | -2.89881231 | -0.29020169 |
| C | 5.15353223  | -2.49609067 | -0.93332767 |
| H | -9.11002932 | 1.61055063  | 2.50132973  |
| H | 4.6734804   | -4.29830437 | 2.29940463  |
| C | 3.39963128  | 2.65905919  | -0.44131311 |
| H | 3.01563755  | -2.95822155 | 3.52983246  |
| H | 1.48031275  | 2.67257696  | -1.43329344 |
| C | 0.12201199  | -2.65040575 | -1.4591695  |
| C | -8.5218198  | 0.88386226  | -0.19480536 |
| C | 0.62288915  | 4.47469745  | 0.22312537  |
| C | 0.44072042  | -1.77464996 | 2.26138031  |
| H | 0.02393549  | -2.27297851 | -3.59600324 |
| C | 2.51601013  | 2.33172035  | -1.47970413 |
| H | 3.08155559  | 5.30824967  | -0.72650086 |
| C | -0.7565548  | 4.38934511  | 0.35186048  |
| H | -6.66912537 | -0.24740966 | -2.85314992 |
| C | -5.31865725 | 2.60726663  | 1.62479564  |
| H | 1.52343704  | -1.69012737 | -2.85200983 |
| H | -4.62428033 | 2.07811344  | 2.2782638   |
| C | -9.68193738 | 2.119518    | 1.71395768  |
| C | 4.71484079  | 2.18133251  | -0.5430005  |
| C | -6.64816783 | 2.25005207  | 1.53990753  |
| C | -7.88657853 | 0.8388439   | -1.44742395 |
| C | -0.00102532 | -2.33205807 | 1.06656466  |
| N | -3.45428182 | 3.95447527  | 0.70736033  |
| H | 5.44237697  | 2.41601788  | 0.23590112  |
| C | -4.81865177 | 3.63573827  | 0.80730191  |
| H | -7.00268314 | 1.40316598  | 2.13107321  |
| H | -1.35107194 | -4.9521879  | -2.0471271  |
| C | 7.11802391  | -1.4263979  | -2.57725162 |
| C | -7.53241371 | 2.88617699  | 0.64592342  |
| H | -10.6177376 | 1.56101606  | 1.5583691   |
| C | -8.9063448  | 2.24455164  | 0.39933623  |
| C | -5.70103375 | 4.34003265  | -0.01340902 |
| C | 4.78854035  | -1.77014342 | -2.05202885 |
| C | -7.04364269 | 3.96773302  | -0.09231254 |
| H | 1.03588607  | 5.24370452  | -0.43113596 |

|                                          |             |             |             |             |
|------------------------------------------|-------------|-------------|-------------|-------------|
| H                                        | -0.03759379 | -2.03071989 | 3.20924357  |             |
| C                                        | 2.94022753  | 1.61173454  | -2.59220881 |             |
| H                                        | 7.88137247  | -1.01182396 | -3.23914233 |             |
| H                                        | -9.93791476 | 3.12062382  | 2.0912115   |             |
| H                                        | -5.30173987 | 5.15274585  | -0.62423514 |             |
| C                                        | 5.77388095  | -1.18617867 | -2.85650154 |             |
| C                                        | 5.13909373  | 1.42441083  | -1.62848867 |             |
| H                                        | -1.42338403 | 5.06715785  | -0.18331239 |             |
| C                                        | 0.90578975  | -3.96674933 | -1.56873997 |             |
| H                                        | -7.69968979 | 4.50676174  | -0.77737238 |             |
| H                                        | 2.25795436  | 1.41447842  | -3.4223335  |             |
| C                                        | 4.25246239  | 1.13559442  | -2.67535605 |             |
| H                                        | 3.73638123  | -1.62684144 | -2.3004461  |             |
| H                                        | -0.82873991 | -3.04532694 | 1.08714093  |             |
| H                                        | -7.85889498 | 1.73484341  | -2.07237622 |             |
| H                                        | 0.70909008  | -4.47871845 | -2.52305003 |             |
| H                                        | 0.66099893  | -4.65189641 | -0.74362827 |             |
| H                                        | 6.17347569  | 1.08270488  | -1.6768067  |             |
| H                                        | 1.98439647  | -3.75679978 | -1.52111454 |             |
| C                                        | -9.77269352 | 3.04941544  | -0.57130627 |             |
| N                                        | 5.4163797   | -0.4225356  | -3.9945484  |             |
| H                                        | -10.7348267 | 2.53661812  | -0.71555678 |             |
| N                                        | 4.65735415  | 0.55332469  | -3.90906019 |             |
| H                                        | -9.31126286 | 3.16522364  | -1.56131096 |             |
| H                                        | -9.9773023  | 4.05600711  | -0.17491122 |             |
| E(el) / Hartree :                        |             |             |             | -2752.87713 |
| E(el) SMD-PBE0-D3(BJ)/def2-SVP / Hartree |             |             |             | -2752.94052 |
| E(el) PBE0-D3(BJ)/def2-TZVPP / Hartree   |             |             |             | -2755.77414 |
| Thermal corrections / Hartree            |             |             |             |             |
| ZPVE:                                    | 1.026287    | E(therm.):  | 1.08413     |             |
| H(corr.):                                | 1.085074    | G(corr.):   | 0.932851    |             |
| Imaginary frequencies:                   | 1           |             |             |             |

### TS (E,Z,Z,Z) → (E,Z,E,Z)

|   |             |             |             |
|---|-------------|-------------|-------------|
| H | -8.79653462 | -2.68699509 | -2.81157241 |
| H | -6.24598363 | -0.67907157 | -1.57090544 |
| H | -3.90216313 | -0.84646711 | -2.27415921 |
| H | -8.68618051 | -4.62570484 | -1.33702494 |
| C | -8.79762548 | -2.00401114 | -1.94971316 |
| C | -5.78592499 | -1.67025477 | -1.62289345 |
| C | -4.45950642 | -1.74563757 | -2.00696239 |
| H | -4.05703533 | 2.4931652   | -3.18251979 |
| H | -9.84326411 | -1.82897232 | -1.65122602 |
| H | 9.80378994  | -0.88908292 | -1.98101854 |
| C | -8.65557657 | -3.96472236 | -0.45756461 |
| H | -8.3730613  | -1.04963042 | -2.29105246 |

H -9.69009901 -3.78829932 -0.12811803  
H -2.14150233 1.51333465 -2.58662617  
H -1.6411441 -1.3969841 -0.75515403  
H 6.46106361 -1.60691547 -1.53138833  
C -4.50660415 2.29648859 -2.19730438  
N 7.94496642 -3.54109078 -0.28521003  
N 8.8982888 -2.7612816 -0.4308959  
H -4.40912076 1.22496736 -1.97561408  
H 0.31059118 1.24602511 -2.27604175  
C -7.98975986 -2.62887263 -0.80532937  
H -5.58056763 2.52273441 -2.26441747  
C -6.53530677 -2.7998095 -1.25614456  
C 5.96331686 -2.09853028 -0.69382576  
C 9.30889013 -0.48546702 -1.09520368  
C -1.64573892 2.04366685 -1.77238243  
H 0.12523486 -0.74829602 0.84319042  
C -0.66028869 -1.87688908 -0.79158393  
C -3.80463851 -3.00568098 -2.06497294  
C -0.26965026 1.8877814 -1.6099123  
C 6.63330153 -3.09398555 0.0321648  
N -2.53718026 -3.10329925 -2.42511082  
H -8.13820733 -4.50073677 0.34993798  
C 8.78011419 -1.37282325 -0.15942899  
C 0.33708408 -1.52307832 0.10406324  
H 4.17412106 -0.94642131 -0.90688807  
C 4.67806545 -1.72606855 -0.33101625  
N -1.36998717 -3.27407687 -2.72540738  
H -3.43984848 4.80887575 -2.44857621  
H 9.52194641 1.55949132 -1.69887182  
C 9.14757574 0.88908682 -0.92419025  
C -5.87483407 -4.0314132 -1.30274585  
C -3.86851068 3.16343009 -1.10427075  
C -0.39901228 -2.84529475 -1.76677949  
H 2.90422647 0.24933805 0.47703118  
C -2.37727701 2.87789921 -0.92278478  
C -4.55309667 -4.15721634 -1.71079568  
C -4.01072145 4.63270277 -1.52533818  
C -7.95627217 -1.73482594 0.4379655  
H -5.06256474 4.88717808 -1.72588943  
C 5.96314832 -3.74975734 1.06325074  
H -8.93367878 -0.01513192 -0.43754895  
C 0.40539258 2.57681911 -0.60037426  
C 4.01921949 -2.31590753 0.76098663  
C -8.43342803 -0.42092178 0.4425818  
N 1.80225494 2.43214731 -0.56977423  
H 6.47146695 -4.56026323 1.58987519  
C 2.71771767 -0.30467456 1.40602854

|   |             |             |             |
|---|-------------|-------------|-------------|
| C | 1.59790658  | -2.1454324  | 0.07868324  |
| C | 8.21407607  | -0.8703084  | 1.02081498  |
| C | 4.6834927   | -3.34380061 | 1.43669004  |
| H | -6.97179131 | -3.23354054 | 1.64530771  |
| C | -7.36136539 | -2.21349925 | 1.61595483  |
| H | 8.24277639  | 3.42215638  | -1.7624317  |
| H | -6.40245746 | -4.94635179 | -1.02660583 |
| C | -4.59131925 | 2.85618586  | 0.20734486  |
| H | -4.07257145 | -5.13550281 | -1.7496624  |
| H | -3.71468042 | 0.88427767  | 0.34452353  |
| C | 2.63062994  | -1.82241787 | 1.16375531  |
| C | 8.4977367   | 1.40336069  | 0.2005328   |
| C | -1.69095845 | 3.52227741  | 0.12417166  |
| C | 0.85954809  | -3.43687548 | -1.84381667 |
| H | 3.53493767  | -0.08242402 | 2.1078711   |
| C | -4.41219886 | 1.59497563  | 0.79561491  |
| H | -3.62738537 | 5.3210888   | -0.75868875 |
| C | -0.32428558 | 3.38756836  | 0.28564666  |
| H | 7.84676075  | -1.55509632 | 1.78626088  |
| C | 4.5243148   | 2.36436394  | -0.73804775 |
| H | 1.78791615  | 0.0892149   | 1.84108542  |
| H | 3.97804685  | 1.89426181  | -1.55730652 |
| C | 8.65436715  | 3.74333682  | -0.79520007 |
| C | -5.45388795 | 3.75512056  | 0.84017634  |
| C | 5.90461282  | 2.33444033  | -0.67580737 |
| C | 8.07892917  | 0.49678241  | 1.18737793  |
| C | 1.83755784  | -3.10799924 | -0.91002304 |
| N | 2.39486925  | 3.11827936  | 0.28700859  |
| H | -5.60310164 | 4.75547161  | 0.43152174  |
| C | 3.79551699  | 3.02060653  | 0.26820593  |
| H | 6.46220568  | 1.80571931  | -1.45304999 |
| H | 4.20233806  | -3.85349707 | 2.27154905  |
| C | -8.24842638 | 0.41328159  | 1.54199467  |
| C | 6.61164265  | 2.95237377  | 0.37354099  |
| H | 9.75318324  | 3.71194119  | -0.85674485 |
| C | 8.14314733  | 2.88196047  | 0.36658873  |
| C | 4.48281628  | 3.64467426  | 1.3107435   |
| C | -7.22429173 | -1.41280468 | 2.7405012   |
| C | 5.87566038  | 3.60620149  | 1.36440715  |
| H | -2.25451425 | 4.14692985  | 0.82236587  |
| H | 1.04340679  | -4.17476421 | -2.62775275 |
| C | -5.11035215 | 1.219397    | 1.93098124  |
| H | -8.5849924  | 1.45112714  | 1.50843486  |
| H | 8.35169709  | 4.78893922  | -0.63929247 |
| H | 3.89986312  | 4.15791312  | 2.07831785  |
| C | -7.60994335 | -0.07067014 | 2.68387013  |
| C | -6.13548053 | 3.40212901  | 2.00445562  |



|                                          |             |             |             |             |
|------------------------------------------|-------------|-------------|-------------|-------------|
| H                                        | 0.21341336  | 3.90721559  | 1.07981647  |             |
| C                                        | 2.1421609   | -2.49157822 | 2.45733363  |             |
| H                                        | 6.38434695  | 4.09793929  | 2.19456961  |             |
| H                                        | -4.96754972 | 0.22529631  | 2.35544255  |             |
| C                                        | -6.00795176 | 2.11659225  | 2.52725406  |             |
| H                                        | -6.76173824 | -1.79605084 | 3.65275696  |             |
| H                                        | 2.80793747  | -3.60467555 | -0.95563408 |             |
| H                                        | 7.58247088  | 0.87015262  | 2.08617577  |             |
| H                                        | 2.83463982  | -2.29252797 | 3.28967592  |             |
| H                                        | 2.03334689  | -3.57951841 | 2.33980006  |             |
| H                                        | -6.79718837 | 4.11272174  | 2.50439336  |             |
| H                                        | 1.15674461  | -2.09106919 | 2.73454861  |             |
| C                                        | 8.76738463  | 3.41636753  | 1.66008696  |             |
| N                                        | -7.387648   | 0.75948221  | 3.81666632  |             |
| H                                        | 9.85947109  | 3.29383998  | 1.61953517  |             |
| N                                        | -6.71553535 | 1.79688661  | 3.72019472  |             |
| H                                        | 8.40449878  | 2.88551596  | 2.55136989  |             |
| H                                        | 8.55387396  | 4.48799666  | 1.79017583  |             |
| E(el) / Hartree :                        |             |             |             | -2752.88195 |
| E(el) SMD-PBE0-D3(BJ)/def2-SVP / Hartree |             |             |             | -2752.947   |
| E(el) PBE0-D3(BJ)/def2-TZVPP / Hartree   |             |             |             | -2755.78007 |
| Thermal corrections / Hartree            |             |             |             |             |
| ZPVE:                                    | 1.026405    |             | E(therm.):  | 1.084265    |
| H(corr.):                                | 1.085209    |             | G(corr.):   | 0.931728    |
| Imaginary frequencies:                   |             |             |             | 1           |

### TS (Z,Z,Z,Z) → (E,Z,Z,Z)

|   |             |             |             |  |
|---|-------------|-------------|-------------|--|
| H | -8.34535587 | -1.43647863 | -2.93353699 |  |
| H | -5.49464251 | 0.1025883   | -1.27578415 |  |
| H | -3.43554886 | 0.75242561  | -2.45363691 |  |
| H | -7.70955368 | -3.78089719 | -2.73220601 |  |
| C | -8.09668113 | -1.25880947 | -1.87717834 |  |
| C | -5.07820353 | -0.57107401 | -2.02856531 |  |
| C | -3.91097436 | -0.20426123 | -2.67390024 |  |
| H | -3.27200291 | 4.57245295  | -1.9795882  |  |
| H | -8.99752078 | -1.45542906 | -1.2752549  |  |
| H | 6.54584689  | -4.61733971 | -1.22405696 |  |
| C | -7.39100417 | -3.62621914 | -1.69036632 |  |
| H | -7.83716203 | -0.19561761 | -1.77724041 |  |
| H | -8.24773619 | -3.8544357  | -1.03968576 |  |
| H | -1.12811621 | 4.2160874   | -2.14590922 |  |
| H | 0.01805425  | 1.58760341  | -2.43105742 |  |
| H | 3.81941762  | -3.35939573 | -0.43331524 |  |
| C | -3.4741353  | 3.76454076  | -1.26106916 |  |
| N | 4.48728095  | -4.94152182 | 1.71880469  |  |
| N | 5.6141869   | -4.86323475 | 1.20745506  |  |

|   |             |             |             |
|---|-------------|-------------|-------------|
| H | -3.11362011 | 2.82501203  | -1.7029956  |
| H | 1.31040043  | 4.3474816   | -2.2164773  |
| C | -6.94319372 | -2.17971504 | -1.46094981 |
| H | -4.56499464 | 3.68963283  | -1.14117453 |
| C | -5.7005203  | -1.80554985 | -2.27874517 |
| C | 3.27377883  | -3.15015314 | 0.48683344  |
| C | 6.57486168  | -3.67833634 | -0.66724246 |
| C | -0.58637743 | 4.1707042   | -1.19902204 |
| H | 0.74547219  | 1.53563131  | -0.08483066 |
| C | -0.20459186 | 0.71587487  | -1.81336282 |
| C | -3.33169644 | -1.06907905 | -3.61139723 |
| C | 0.8004022   | 4.24344388  | -1.2577953  |
| C | 3.54276338  | -3.88217782 | 1.65130199  |
| N | -2.16830777 | -0.70787211 | -4.33185007 |
| H | -6.59862591 | -4.35422339 | -1.46734963 |
| C | 6.10284095  | -3.65520545 | 0.64423585  |
| C | 0.22504822  | 0.66676258  | -0.48906943 |
| H | 2.11851191  | -1.59268574 | -0.41453804 |
| C | 2.31110498  | -2.15302637 | 0.50263265  |
| N | -1.14000398 | -0.29717087 | -3.77689453 |
| H | -2.91908247 | 6.19096068  | -0.21465832 |
| H | 7.33219912  | -2.53827857 | -2.31199307 |
| C | 7.0162478   | -2.50197645 | -1.26863447 |
| C | -5.13640577 | -2.63516555 | -3.25109431 |
| C | -2.81528402 | 4.05153978  | 0.09493722  |
| C | -0.91016748 | -0.34984604 | -2.37509711 |
| H | 2.30386811  | 0.7455375   | 1.41096143  |
| C | -1.28637353 | 4.0361837   | 0.00389985  |
| C | -3.97835125 | -2.26191851 | -3.93317057 |
| C | -3.24708743 | 5.45742432  | 0.5358942   |
| C | -6.52973578 | -1.98143152 | -0.00054628 |
| H | -4.34181898 | 5.53256779  | 0.63577753  |
| C | 2.77707437  | -3.64243119 | 2.79388679  |
| H | -7.81628954 | -0.29372743 | 0.41997481  |
| C | 1.56508519  | 4.21805967  | -0.06249353 |
| C | 1.58475481  | -1.84818136 | 1.66400477  |
| C | -7.01064888 | -0.93131768 | 0.78612625  |
| N | 2.87820418  | 4.36251744  | -0.0777944  |
| H | 2.95275685  | -4.25688946 | 3.67941492  |
| C | 1.46638256  | 0.56984865  | 2.10208067  |
| C | 0.02438995  | -0.47530072 | 0.29214511  |
| C | 6.18822088  | -2.47095669 | 1.38711686  |
| C | 1.82857957  | -2.6235334  | 2.80356508  |
| H | -5.13039149 | -3.62972351 | -0.04533673 |
| C | -5.52642614 | -2.79865534 | 0.54272053  |
| H | 6.62659628  | -0.30629145 | -3.1358458  |
| H | -5.59837288 | -3.59381782 | -3.49168898 |

|   |             |             |             |
|---|-------------|-------------|-------------|
| C | -3.26050765 | 2.97840897  | 1.09035465  |
| H | -3.54628097 | -2.90668856 | -4.70141624 |
| H | -2.57923157 | 1.34587271  | -0.15904641 |
| C | 0.63070806  | -0.6490028  | 1.68542178  |
| C | 7.05722668  | -1.29734891 | -0.56037213 |
| C | -0.51379127 | 3.98022821  | 1.17374652  |
| C | -1.17127553 | -1.48091014 | -1.58351705 |
| H | 1.89254851  | 0.39861806  | 3.1011955   |
| C | -3.0637751  | 1.62370285  | 0.77900149  |
| H | -2.78700816 | 5.74481746  | 1.49222428  |
| C | 0.86715986  | 4.07465722  | 1.16863054  |
| H | 5.85183931  | -2.45701897 | 2.42547574  |
| C | 4.36197206  | 2.0419345   | -0.70055054 |
| H | 0.84885217  | 1.47887757  | 2.13971676  |
| H | 3.28333216  | 1.90662713  | -0.81486561 |
| C | 7.61000121  | -0.05539509 | -2.71200165 |
| C | -3.82256095 | 3.27954689  | 2.33580689  |
| C | 5.23862715  | 0.99510717  | -0.94203416 |
| C | 6.66958341  | -1.3169235  | 0.78802142  |
| C | -0.69780389 | -1.53571579 | -0.2803902  |
| N | 4.08917731  | 4.45907838  | -0.07491636 |
| H | -3.98728384 | 4.31740419  | 2.6269653   |
| C | 4.8734272   | 3.2902163   | -0.32123596 |
| H | 4.84101299  | 0.01994681  | -1.23475667 |
| H | 1.26887544  | -2.43999816 | 3.72183642  |
| C | -6.43752594 | -0.63232527 | 2.01896366  |
| C | 6.63198328  | 1.15684067  | -0.80916228 |
| H | 8.34180014  | -0.7980455  | -3.06356503 |
| C | 7.56837838  | 0.00402345  | -1.17676605 |
| C | 6.24741861  | 3.46830741  | -0.18137428 |
| C | -4.98417626 | -2.54695405 | 1.79424695  |
| C | 7.11699918  | 2.40761003  | -0.41548714 |
| H | -1.01405044 | 3.86042453  | 2.13909593  |
| H | -1.70773915 | -2.33255343 | -2.00423755 |
| C | -3.44175876 | 0.61286195  | 1.64928264  |
| H | -6.78472449 | 0.22658118  | 2.5964496   |
| H | 7.91052239  | 0.92367662  | -3.11246855 |
| H | 6.61081995  | 4.4551494   | 0.11312324  |
| C | -5.3883593  | -1.41296019 | 2.50438163  |
| C | -4.141366   | 2.27558354  | 3.24774729  |
| H | 1.43304682  | 4.04661401  | 2.10057744  |
| C | -0.4969342  | -0.82112076 | 2.71140525  |
| H | 8.18849074  | 2.56948461  | -0.29687773 |
| H | -3.27725917 | -0.42557771 | 1.36285293  |
| C | -3.98316949 | 0.93235195  | 2.90516164  |
| H | -4.19682326 | -3.18130477 | 2.20728835  |
| H | -0.85583206 | -2.44961479 | 0.2983069   |

|                                          |             |             |             |             |          |
|------------------------------------------|-------------|-------------|-------------|-------------|----------|
| H                                        | 6.71342027  | -0.39425931 | 1.37293599  |             |          |
| H                                        | -0.1031448  | -0.89157547 | 3.73531338  |             |          |
| H                                        | -1.10183833 | -1.71932223 | 2.51788072  |             |          |
| H                                        | -4.52081792 | 2.5211288   | 4.24207608  |             |          |
| H                                        | -1.16121856 | 0.05221364  | 2.6783618   |             |          |
| C                                        | 8.99903376  | 0.22555628  | -0.66388007 |             |          |
| N                                        | -4.76136518 | -1.11645063 | 3.74047345  |             |          |
| H                                        | 9.60921407  | -0.65936695 | -0.89472142 |             |          |
| N                                        | -4.20580486 | -0.0257774  | 3.93358525  |             |          |
| H                                        | 9.02156158  | 0.3721762   | 0.42600443  |             |          |
| H                                        | 9.47522969  | 1.09334035  | -1.14504069 |             |          |
| E(el) / Hartree :                        |             |             |             | -2752.87161 |          |
| E(el) SMD-PBE0-D3(BJ)/def2-SVP / Hartree |             |             |             | -2752.93315 |          |
| E(el) PBE0-D3(BJ)/def2-TZVPP / Hartree   |             |             |             | -2755.76908 |          |
| Thermal corrections / Hartree            |             |             |             |             |          |
| ZPVE:                                    |             |             | 1.026554    | E(therm.):  | 1.084056 |
| H(corr.):                                |             |             | 1.085001    | G(corr.):   | 0.933752 |
| Imaginary frequencies:                   |             |             | 1           |             |          |

### *p*-iPropylazobenzene

#### **(*E*)-i**Pr-AB

|   |             |             |             |  |  |
|---|-------------|-------------|-------------|--|--|
| C | 4.97141687  | -1.30373584 | -9.6561E-06 |  |  |
| C | 3.59643257  | -1.11415147 | -8.7986E-06 |  |  |
| C | -2.68196624 | -1.0939077  | -1.2056E-05 |  |  |
| C | -3.22392313 | 0.19804076  | -1.1413E-06 |  |  |
| C | -1.30654969 | -1.28959404 | -1.2894E-05 |  |  |
| C | -2.33920419 | 1.28738474  | 8.9493E-06  |  |  |
| C | -0.43596703 | -0.19382582 | -2.785E-06  |  |  |
| C | -0.96399484 | 1.1051459   | 8.225E-06   |  |  |
| C | 5.83729599  | -0.20493151 | 8.973E-07   |  |  |
| C | 3.07616772  | 0.18955854  | 2.7171E-06  |  |  |
| C | 5.32163738  | 1.09028666  | 1.2356E-05  |  |  |
| C | 3.94358521  | 1.28736844  | 1.3248E-05  |  |  |
| N | 0.93746061  | -0.49257883 | -4.5081E-06 |  |  |
| N | 1.70113907  | 0.49167351  | 4.5207E-06  |  |  |
| H | 5.37998094  | -2.31738001 | -1.8637E-05 |  |  |
| H | 2.89693228  | -1.95124539 | -1.6866E-05 |  |  |
| H | -3.3454893  | -1.96256781 | -2.0034E-05 |  |  |
| H | -0.87120013 | -2.29108375 | -2.1353E-05 |  |  |
| H | 6.91847525  | -0.3629561  | 1.447E-07   |  |  |
| H | -2.74866969 | 2.30179586  | 1.7552E-05  |  |  |
| H | -0.27167292 | 1.9482589   | 1.603E-05   |  |  |
| H | 5.99639966  | 1.94940189  | 2.061E-05   |  |  |
| H | 3.50487864  | 2.28729477  | 2.2045E-05  |  |  |
| C | -4.72069971 | 0.41920419  | -1.029E-07  |  |  |
| C | -5.37204751 | -0.14355355 | 1.26327873  |  |  |

|                                        |             |             |             |             |
|----------------------------------------|-------------|-------------|-------------|-------------|
| H                                      | -4.91915587 | 0.283123    | 2.17056015  |             |
| H                                      | -6.45007401 | 0.08072442  | 1.27918315  |             |
| H                                      | -5.25945283 | -1.23813702 | 1.31655215  |             |
| C                                      | -5.37204629 | -0.1435327  | -1.26328885 |             |
| H                                      | -6.45007273 | 0.08074571  | -1.27919068 |             |
| H                                      | -4.91915366 | 0.28315871  | -2.17056279 |             |
| H                                      | -5.25945175 | -1.23811531 | -1.31658015 |             |
| H                                      | -4.88064567 | 1.51097282  | 8.8311E-06  |             |
| E(el) / Hartree :                      |             |             |             | -689.427819 |
| E(el) PBE0-D3(BJ)/def2-TZVPP / Hartree |             |             |             | -690.15884  |
| Thermal corrections / Hartree          |             |             |             |             |
| ZPVE:                                  |             | 0.276935    | E(therm.):  | 0.292104    |
| H(corr.):                              |             | 0.293048    | G(corr.):   | 0.232505    |
| Imaginary frequencies:                 |             |             |             | 0           |

### **(Z)-<sup>i</sup>Pr-AB**

|   |             |             |             |
|---|-------------|-------------|-------------|
| H | 2.26419582  | -2.13255056 | -2.06944821 |
| H | 1.49956045  | 0.2142539   | -1.79412526 |
| C | 2.59724909  | -1.55144381 | -1.20619235 |
| C | 2.16687719  | -0.23738201 | -1.05803189 |
| C | 3.44349478  | -2.12999063 | -0.25910866 |
| H | -0.82194992 | 2.79032805  | -1.51949422 |
| C | 2.60083515  | 0.51386464  | 0.04229697  |
| C | -1.00644237 | 1.92769464  | -0.87567644 |
| H | -2.95665779 | 1.50634783  | -1.68012635 |
| C | -2.19659637 | 1.21139518  | -0.95122178 |
| N | 2.29545262  | 1.89272201  | 0.18969226  |
| N | 1.14937523  | 2.35121024  | 0.09690731  |
| C | -0.01259845 | 1.53944312  | 0.02602036  |
| C | 3.88759716  | -1.37406019 | 0.82614123  |
| C | -2.4515035  | 0.13433544  | -0.09578296 |
| C | 3.49094909  | -0.04744042 | 0.96381314  |
| C | -0.25831722 | 0.47506254  | 0.90435072  |
| C | -1.46678945 | -0.20506449 | 0.84344136  |
| H | 4.5636756   | -1.81619009 | 1.5617797   |
| H | 0.49621245  | 0.18983125  | 1.63923522  |
| H | 3.85362293  | 0.57291839  | 1.786168    |
| H | -1.64425676 | -1.02599688 | 1.54328795  |
| H | 3.76968841  | -3.165801   | -0.3762862  |
| C | -3.75723231 | -0.62679639 | -0.1704318  |
| H | -4.34538907 | -0.16875088 | -0.98404659 |
| C | -3.53145757 | -2.09456241 | -0.53269232 |
| H | -2.95653303 | -2.6148603  | 0.24995552  |
| H | -4.4917845  | -2.62169957 | -0.64487537 |
| H | -2.97407991 | -2.19196429 | -1.47625155 |
| C | -4.56564991 | -0.48711234 | 1.11928397  |

|                                        |             |             |             |          |
|----------------------------------------|-------------|-------------|-------------|----------|
| H                                      | -5.53940349 | -0.99307222 | 1.02691639  |          |
| H                                      | -4.03613294 | -0.93942962 | 1.97297009  |          |
| H                                      | -4.74949841 | 0.56983688  | 1.36288877  |          |
| E(el) / Hartree :                      |             |             | -689.406316 |          |
| E(el) PBE0-D3(BJ)/def2-TZVPP / Hartree |             |             | -690.138635 |          |
| Thermal corrections / Hartree          |             |             |             |          |
| ZPVE:                                  |             | 0.276589    | E(therm.):  | 0.291669 |
| H(corr.):                              |             | 0.292613    | G(corr.):   | 0.232629 |
| Imaginary frequencies:                 |             | 0           |             |          |

## H<sub>2</sub>

|                                        |             |             |             |           |
|----------------------------------------|-------------|-------------|-------------|-----------|
| H                                      | -1.11552619 | -0.34260138 | -3.09595984 |           |
| H                                      | -1.4449105  | 0.34260138  | -3.12423146 |           |
| E(el) / Hartree :                      |             |             | -1.1638278  |           |
| E(el) PBE0-D3(BJ)/def2-TZVPP / Hartree |             |             | -1.16840206 |           |
| Thermal corrections / Hartree          |             |             |             |           |
| ZPVE:                                  |             | 0.009988    | E(therm.):  | 0.012348  |
| H(corr.):                              |             | 0.013292    | G(corr.):   | -0.001545 |
| Imaginary frequencies:                 |             | 0           |             |           |

## X-Ray Crystallography

Single crystals were obtained by diffusion of *n*-pentane into a concentrated solution of compounds **1,2** in CH<sub>2</sub>Cl<sub>2</sub> or CHCl<sub>3</sub> at -20 °C. For tetraazo-macrocycle **3**, single crystals were obtained by slow evaporation of a solution in CS<sub>2</sub>/CH<sub>2</sub>Cl<sub>2</sub>, 1:1.

Diffraction data for all samples were collected at low temperatures (100K) using  $\phi$ - and  $\omega$ -scans on a BRUKER D8 Venture system equipped with dual I $\mu$ S microfocus sources, a PHOTON100 detector and an OXFORD CRYOSYSTEMS 700 low temperature system. Mo-K $\alpha$  radiation with wavelength 0.71073 Å and a collimating Quazar multilayer mirror were used. Semi-empirical absorption correction from equivalents was applied using SADABS-2016/2<sup>[14]</sup> and the structure was solved by direct methods using SHELXT2014/5.<sup>[15]</sup>

Refinement was performed against  $F^2$  on all data by full-matrix least squares using SHELXL2016/6.<sup>[15]</sup> All non-hydrogen atoms were refined anisotropically and C-H hydrogen atoms were positioned at geometrically calculated positions and refined using a riding model. The isotropic displacement parameters of all hydrogen atoms were fixed to 1.2x or 1.5x (CH<sub>3</sub> hydrogens) the  $U_{eq}$  value of the atoms they are linked to. The crystallographic data have been deposited with the Cambridge Crystallographic Data Centre as CCDC No. 1902881 – 1902883 and can be obtained free of charge. [ <https://www.ccdc.cam.ac.uk/structures/> ]

## Bisazo macrocycle 1

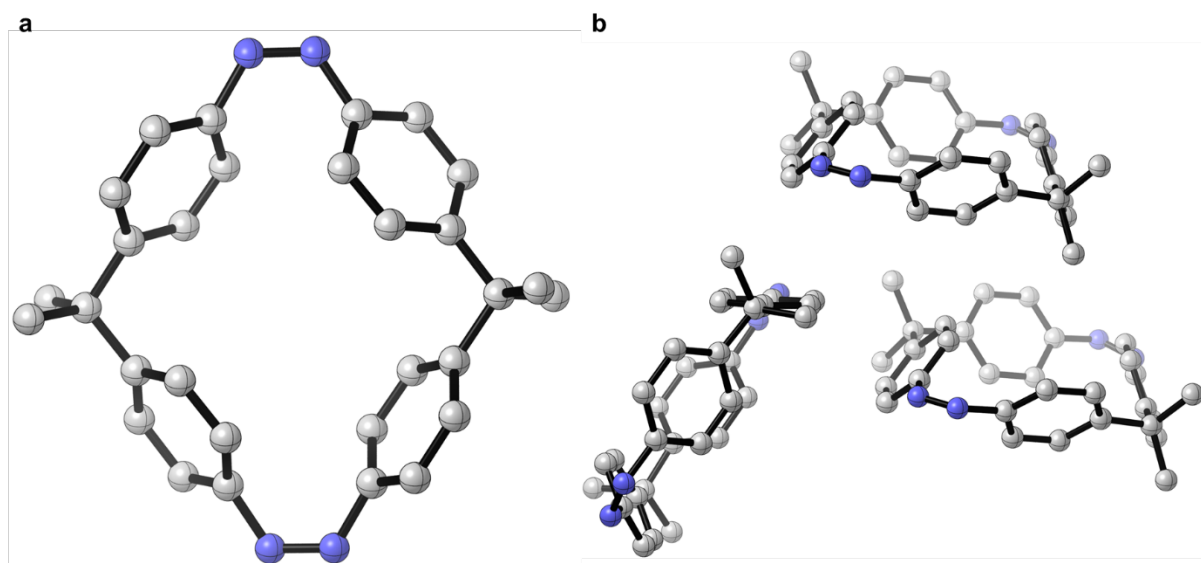

**Figure S12a:** Single crystal structure of bisazo macrocycle **1**. **b:** Crystal packing of bisazo macrocycle **1** (grey: carbon, blue: nitrogen; hydrogens omitted).

The unit cell was determined using 9672 reflections and the structure was solved in the monoclinic space group  $P2_1$ . The asymmetric unit contains one Bisazo macrocycle **1** molecule.

Crystal data and structure refinement for Bisazo macrocycle **1**.

|                                 |                                       |                               |
|---------------------------------|---------------------------------------|-------------------------------|
| CCDC No                         | 1902881                               |                               |
| Empirical formula               | $C_{30} H_{28} N_4$                   |                               |
| Formula weight                  | 444.56                                |                               |
| Temperature                     | 100(2) K                              |                               |
| Wavelength                      | 1.54178 Å                             |                               |
| Crystal system                  | Monoclinic                            |                               |
| Space group                     | $P2_1$                                |                               |
| Unit cell dimensions            | $a = 11.7996(6)$ Å                    | $\alpha = 90^\circ$ .         |
|                                 | $b = 6.7102(4)$ Å                     | $\beta = 98.2079(17)^\circ$ . |
|                                 | $c = 15.2460(8)$ Å                    | $\gamma = 90^\circ$ .         |
| Volume                          | $1194.78(11)$ Å <sup>3</sup>          |                               |
| Z                               | 2                                     |                               |
| Density (calculated)            | 1.236 Mg/m <sup>3</sup>               |                               |
| Absorption coefficient          | 0.570 mm <sup>-1</sup>                |                               |
| F(000)                          | 472                                   |                               |
| Crystal size                    | 0.844 x 0.533 x 0.300 mm <sup>3</sup> |                               |
| Theta range for data collection | 2.928 to 74.460°.                     |                               |



|                                 |                                    |
|---------------------------------|------------------------------------|
| Index ranges                    | -14<=h<=14, -8<=k<=8, -19<=l<=19   |
| Reflections collected           | 66300                              |
| Independent reflections         | 4876 [R(int) = 0.0356]             |
| Completeness to theta = 67.679° | 99.8 %                             |
| Absorption correction           | Semi-empirical from equivalents    |
| Refinement method               | Full-matrix least-squares on $F^2$ |
| Data / restraints / parameters  | 4876 / 1 / 312                     |
| Goodness-of-fit on $F^2$        | 1.050                              |
| Final R indices [I>2sigma(I)]   | R1 = 0.0281, wR2 = 0.0743          |
| R indices (all data)            | R1 = 0.0284, wR2 = 0.0745          |
| Absolute structure parameter    | 0.01(10)                           |
| Extinction coefficient          | 0.0169(11)                         |
| Largest diff. peak and hole     | 0.291 and -0.139 e.Å <sup>-3</sup> |

Atomic coordinates ( $\times 10^4$ ) and equivalent isotropic displacement parameters ( $\text{\AA}^2 \times 10^3$ )  
for Bisazo macrocycle **1**.  $U(\text{eq})$  is defined as one third of the trace of the orthogonalized  $U^{ij}$  tensor.

|       | x        | y        | z       | $U(\text{eq})$ |
|-------|----------|----------|---------|----------------|
| N(1)  | 2077(1)  | 3857(2)  | 5509(1) | 21(1)          |
| N(2)  | 3030(1)  | 3015(2)  | 5536(1) | 20(1)          |
| N(3)  | 2886(1)  | 5857(2)  | -533(1) | 22(1)          |
| N(4)  | 2051(1)  | 7010(2)  | -519(1) | 23(1)          |
| C(1)  | 3588(1)  | 2818(2)  | 4758(1) | 17(1)          |
| C(2)  | 3045(1)  | 1940(3)  | 3978(1) | 18(1)          |
| C(3)  | 3647(1)  | 1682(2)  | 3274(1) | 18(1)          |
| C(4)  | 4791(1)  | 2291(2)  | 3316(1) | 16(1)          |
| C(5)  | 5318(1)  | 3145(2)  | 4104(1) | 17(1)          |
| C(6)  | 4731(1)  | 3358(2)  | 4829(1) | 18(1)          |
| C(7)  | 5416(1)  | 1943(3)  | 2512(1) | 17(1)          |
| C(8)  | 5523(1)  | -301(3)  | 2391(1) | 20(1)          |
| C(9)  | 6623(1)  | 2848(3)  | 2638(1) | 21(1)          |
| C(10) | 4717(1)  | 2925(3)  | 1698(1) | 16(1)          |
| C(11) | 4413(1)  | 4929(3)  | 1754(1) | 20(1)          |
| C(12) | 3791(1)  | 5917(3)  | 1052(1) | 21(1)          |
| C(13) | 3455(1)  | 4901(3)  | 255(1)  | 19(1)          |
| C(14) | 3792(1)  | 2934(3)  | 170(1)  | 20(1)          |
| C(15) | 4402(1)  | 1947(3)  | 893(1)  | 18(1)          |
| C(21) | 1513(1)  | 7256(3)  | 268(1)  | 20(1)          |
| C(22) | 1328(2)  | 9171(3)  | 550(1)  | 23(1)          |
| C(23) | 763(1)   | 9473(3)  | 1281(1) | 21(1)          |
| C(24) | 336(1)   | 7878(3)  | 1714(1) | 17(1)          |
| C(25) | 497(1)   | 5955(3)  | 1397(1) | 21(1)          |
| C(26) | 1081(2)  | 5631(3)  | 686(1)  | 22(1)          |
| C(27) | -323(1)  | 8123(3)  | 2508(1) | 18(1)          |
| C(28) | -1559(1) | 7399(3)  | 2230(1) | 22(1)          |
| C(29) | -373(2)  | 10312(3) | 2801(1) | 21(1)          |
| C(30) | 303(1)   | 6916(2)  | 3287(1) | 16(1)          |
| C(31) | 1472(1)  | 7275(3)  | 3556(1) | 18(1)          |
| C(32) | 2083(1)  | 6280(3)  | 4264(1) | 19(1)          |
| C(33) | 1526(1)  | 4870(3)  | 4726(1) | 18(1)          |
| C(34) | 359(1)   | 4540(3)  | 4488(1) | 19(1)          |
| C(35) | -242(1)  | 5532(3)  | 3761(1) | 18(1)          |

Bond lengths [Å] and angles [°] for Bisazo macrocycle **1**.

---

|             |          |                 |            |
|-------------|----------|-----------------|------------|
| N(1)-N(2)   | 1.254(2) | C(15)-H(15)     | 0.9500     |
| N(1)-C(33)  | 1.446(2) | C(21)-C(22)     | 1.382(3)   |
| N(2)-C(1)   | 1.442(2) | C(21)-C(26)     | 1.394(3)   |
| N(3)-N(4)   | 1.255(2) | C(22)-C(23)     | 1.393(2)   |
| N(3)-C(13)  | 1.441(2) | C(22)-H(22)     | 0.9500     |
| N(4)-C(21)  | 1.446(2) | C(23)-C(24)     | 1.389(2)   |
| C(1)-C(6)   | 1.386(2) | C(23)-H(23)     | 0.9500     |
| C(1)-C(2)   | 1.397(2) | C(24)-C(25)     | 1.401(2)   |
| C(2)-C(3)   | 1.379(2) | C(24)-C(27)     | 1.538(2)   |
| C(2)-H(2)   | 0.9500   | C(25)-C(26)     | 1.383(2)   |
| C(3)-C(4)   | 1.403(2) | C(25)-H(25)     | 0.9500     |
| C(3)-H(3)   | 0.9500   | C(26)-H(26)     | 0.9500     |
| C(4)-C(5)   | 1.395(2) | C(27)-C(30)     | 1.537(2)   |
| C(4)-C(7)   | 1.535(2) | C(27)-C(28)     | 1.538(2)   |
| C(5)-C(6)   | 1.393(2) | C(27)-C(29)     | 1.539(2)   |
| C(5)-H(5)   | 0.9500   | C(28)-H(28A)    | 0.9800     |
| C(6)-H(6)   | 0.9500   | C(28)-H(28B)    | 0.9800     |
| C(7)-C(8)   | 1.524(2) | C(28)-H(28C)    | 0.9800     |
| C(7)-C(9)   | 1.536(2) | C(29)-H(29A)    | 0.9800     |
| C(7)-C(10)  | 1.536(2) | C(29)-H(29B)    | 0.9800     |
| C(8)-H(8A)  | 0.9800   | C(29)-H(29C)    | 0.9800     |
| C(8)-H(8B)  | 0.9800   | C(30)-C(35)     | 1.389(2)   |
| C(8)-H(8C)  | 0.9800   | C(30)-C(31)     | 1.403(2)   |
| C(9)-H(9A)  | 0.9800   | C(31)-C(32)     | 1.382(2)   |
| C(9)-H(9B)  | 0.9800   | C(31)-H(31)     | 0.9500     |
| C(9)-H(9C)  | 0.9800   | C(32)-C(33)     | 1.397(2)   |
| C(10)-C(15) | 1.395(2) | C(32)-H(32)     | 0.9500     |
| C(10)-C(11) | 1.397(2) | C(33)-C(34)     | 1.391(2)   |
| C(11)-C(12) | 1.377(2) | C(34)-C(35)     | 1.397(2)   |
| C(11)-H(11) | 0.9500   | C(34)-H(34)     | 0.9500     |
| C(12)-C(13) | 1.401(2) | C(35)-H(35)     | 0.9500     |
| C(12)-H(12) | 0.9500   |                 |            |
| C(13)-C(14) | 1.390(3) | N(2)-N(1)-C(33) | 122.23(13) |
| C(14)-C(15) | 1.394(2) | N(1)-N(2)-C(1)  | 121.85(14) |
| C(14)-H(14) | 0.9500   | N(4)-N(3)-C(13) | 122.26(14) |

|                   |            |                   |            |
|-------------------|------------|-------------------|------------|
| N(3)-N(4)-C(21)   | 121.55(14) | C(11)-C(10)-C(7)  | 118.46(14) |
| C(6)-C(1)-C(2)    | 120.03(15) | C(12)-C(11)-C(10) | 121.92(15) |
| C(6)-C(1)-N(2)    | 117.66(14) | C(12)-C(11)-H(11) | 119.0      |
| C(2)-C(1)-N(2)    | 122.03(15) | C(10)-C(11)-H(11) | 119.0      |
| C(3)-C(2)-C(1)    | 119.33(14) | C(11)-C(12)-C(13) | 119.55(16) |
| C(3)-C(2)-H(2)    | 120.3      | C(11)-C(12)-H(12) | 120.2      |
| C(1)-C(2)-H(2)    | 120.3      | C(13)-C(12)-H(12) | 120.2      |
| C(2)-C(3)-C(4)    | 121.83(15) | C(14)-C(13)-C(12) | 119.57(15) |
| C(2)-C(3)-H(3)    | 119.1      | C(14)-C(13)-N(3)  | 116.79(15) |
| C(4)-C(3)-H(3)    | 119.1      | C(12)-C(13)-N(3)  | 123.21(16) |
| C(5)-C(4)-C(3)    | 117.74(14) | C(13)-C(14)-C(15) | 120.01(15) |
| C(5)-C(4)-C(7)    | 122.99(14) | C(13)-C(14)-H(14) | 120.0      |
| C(3)-C(4)-C(7)    | 119.25(14) | C(15)-C(14)-H(14) | 120.0      |
| C(6)-C(5)-C(4)    | 121.02(14) | C(14)-C(15)-C(10) | 120.94(15) |
| C(6)-C(5)-H(5)    | 119.5      | C(14)-C(15)-H(15) | 119.5      |
| C(4)-C(5)-H(5)    | 119.5      | C(10)-C(15)-H(15) | 119.5      |
| C(1)-C(6)-C(5)    | 119.92(14) | C(22)-C(21)-C(26) | 120.07(15) |
| C(1)-C(6)-H(6)    | 120.0      | C(22)-C(21)-N(4)  | 118.12(16) |
| C(5)-C(6)-H(6)    | 120.0      | C(26)-C(21)-N(4)  | 121.48(16) |
| C(8)-C(7)-C(4)    | 107.71(13) | C(21)-C(22)-C(23) | 119.89(16) |
| C(8)-C(7)-C(9)    | 108.29(14) | C(21)-C(22)-H(22) | 120.1      |
| C(4)-C(7)-C(9)    | 112.50(13) | C(23)-C(22)-H(22) | 120.1      |
| C(8)-C(7)-C(10)   | 111.74(13) | C(24)-C(23)-C(22) | 121.07(16) |
| C(4)-C(7)-C(10)   | 108.41(13) | C(24)-C(23)-H(23) | 119.5      |
| C(9)-C(7)-C(10)   | 108.23(13) | C(22)-C(23)-H(23) | 119.5      |
| C(7)-C(8)-H(8A)   | 109.5      | C(23)-C(24)-C(25) | 117.97(15) |
| C(7)-C(8)-H(8B)   | 109.5      | C(23)-C(24)-C(27) | 123.40(15) |
| H(8A)-C(8)-H(8B)  | 109.5      | C(25)-C(24)-C(27) | 118.61(15) |
| C(7)-C(8)-H(8C)   | 109.5      | C(26)-C(25)-C(24) | 121.52(16) |
| H(8A)-C(8)-H(8C)  | 109.5      | C(26)-C(25)-H(25) | 119.2      |
| H(8B)-C(8)-H(8C)  | 109.5      | C(24)-C(25)-H(25) | 119.2      |
| C(7)-C(9)-H(9A)   | 109.5      | C(25)-C(26)-C(21) | 119.39(17) |
| C(7)-C(9)-H(9B)   | 109.5      | C(25)-C(26)-H(26) | 120.3      |
| H(9A)-C(9)-H(9B)  | 109.5      | C(21)-C(26)-H(26) | 120.3      |
| C(7)-C(9)-H(9C)   | 109.5      | C(30)-C(27)-C(24) | 108.11(13) |
| H(9A)-C(9)-H(9C)  | 109.5      | C(30)-C(27)-C(28) | 112.27(14) |
| H(9B)-C(9)-H(9C)  | 109.5      | C(24)-C(27)-C(28) | 108.37(13) |
| C(15)-C(10)-C(11) | 117.90(15) | C(30)-C(27)-C(29) | 108.21(13) |
| C(15)-C(10)-C(7)  | 123.61(14) | C(24)-C(27)-C(29) | 112.02(14) |

|                     |            |                   |            |
|---------------------|------------|-------------------|------------|
| C(28)-C(27)-C(29)   | 107.92(14) | C(32)-C(31)-C(30) | 121.72(15) |
| C(27)-C(28)-H(28A)  | 109.5      | C(32)-C(31)-H(31) | 119.1      |
| C(27)-C(28)-H(28B)  | 109.5      | C(30)-C(31)-H(31) | 119.1      |
| H(28A)-C(28)-H(28B) | 109.5      | C(31)-C(32)-C(33) | 119.37(15) |
| C(27)-C(28)-H(28C)  | 109.5      | C(31)-C(32)-H(32) | 120.3      |
| H(28A)-C(28)-H(28C) | 109.5      | C(33)-C(32)-H(32) | 120.3      |
| H(28B)-C(28)-H(28C) | 109.5      | C(34)-C(33)-C(32) | 119.78(15) |
| C(27)-C(29)-H(29A)  | 109.5      | C(34)-C(33)-N(1)  | 116.84(14) |
| C(27)-C(29)-H(29B)  | 109.5      | C(32)-C(33)-N(1)  | 123.07(14) |
| H(29A)-C(29)-H(29B) | 109.5      | C(33)-C(34)-C(35) | 120.10(15) |
| C(27)-C(29)-H(29C)  | 109.5      | C(33)-C(34)-H(34) | 119.9      |
| H(29A)-C(29)-H(29C) | 109.5      | C(35)-C(34)-H(34) | 119.9      |
| H(29B)-C(29)-H(29C) | 109.5      | C(30)-C(35)-C(34) | 120.74(15) |
| C(35)-C(30)-C(31)   | 118.20(15) | C(30)-C(35)-H(35) | 119.6      |
| C(35)-C(30)-C(27)   | 123.13(14) | C(34)-C(35)-H(35) | 119.6      |
| C(31)-C(30)-C(27)   | 118.63(14) |                   |            |

Anisotropic displacement parameters ( $\text{\AA}^2 \times 10^3$ ) for Bisazo macrocycle **1**. The anisotropic displacement factor exponent takes the form:  $-2\pi^2 [ h^2 a^{*2} U^{11} + \dots + 2 h k a^* b^* U^{12} ]$

|       | $U^{11}$ | $U^{22}$ | $U^{33}$ | $U^{23}$ | $U^{13}$ | $U^{12}$ |
|-------|----------|----------|----------|----------|----------|----------|
| N(1)  | 20(1)    | 26(1)    | 16(1)    | 1(1)     | 4(1)     | 2(1)     |
| N(2)  | 21(1)    | 24(1)    | 17(1)    | 0(1)     | 3(1)     | 2(1)     |
| N(3)  | 22(1)    | 27(1)    | 17(1)    | 2(1)     | 3(1)     | 1(1)     |
| N(4)  | 23(1)    | 29(1)    | 16(1)    | 2(1)     | 4(1)     | 2(1)     |
| C(1)  | 19(1)    | 18(1)    | 14(1)    | 1(1)     | 2(1)     | 4(1)     |
| C(2)  | 15(1)    | 21(1)    | 19(1)    | 0(1)     | 2(1)     | -1(1)    |
| C(3)  | 17(1)    | 19(1)    | 17(1)    | -1(1)    | 0(1)     | -2(1)    |
| C(4)  | 16(1)    | 15(1)    | 16(1)    | 1(1)     | 2(1)     | 2(1)     |
| C(5)  | 15(1)    | 16(1)    | 19(1)    | 0(1)     | 0(1)     | -1(1)    |
| C(6)  | 20(1)    | 17(1)    | 15(1)    | -2(1)    | -2(1)    | 2(1)     |
| C(7)  | 17(1)    | 19(1)    | 16(1)    | -1(1)    | 3(1)     | 0(1)     |
| C(8)  | 21(1)    | 23(1)    | 15(1)    | -1(1)    | 2(1)     | 4(1)     |
| C(9)  | 16(1)    | 29(1)    | 20(1)    | 0(1)     | 3(1)     | -1(1)    |
| C(10) | 14(1)    | 20(1)    | 16(1)    | 0(1)     | 4(1)     | -2(1)    |
| C(11) | 23(1)    | 20(1)    | 16(1)    | -2(1)    | 2(1)     | -3(1)    |
| C(12) | 21(1)    | 20(1)    | 20(1)    | 0(1)     | 3(1)     | -1(1)    |

|       |       |       |       |       |      |       |
|-------|-------|-------|-------|-------|------|-------|
| C(13) | 17(1) | 26(1) | 15(1) | 3(1)  | 5(1) | -1(1) |
| C(14) | 20(1) | 26(1) | 14(1) | -3(1) | 5(1) | 0(1)  |
| C(15) | 18(1) | 20(1) | 18(1) | -3(1) | 4(1) | 1(1)  |
| C(21) | 16(1) | 29(1) | 14(1) | 1(1)  | 1(1) | 2(1)  |
| C(22) | 23(1) | 24(1) | 22(1) | 8(1)  | 6(1) | 3(1)  |
| C(23) | 22(1) | 20(1) | 21(1) | 2(1)  | 4(1) | 3(1)  |
| C(24) | 14(1) | 23(1) | 14(1) | 1(1)  | 0(1) | 1(1)  |
| C(25) | 21(1) | 22(1) | 21(1) | 0(1)  | 4(1) | -3(1) |
| C(26) | 22(1) | 24(1) | 21(1) | -4(1) | 3(1) | -1(1) |
| C(27) | 14(1) | 22(1) | 17(1) | 1(1)  | 3(1) | 2(1)  |
| C(28) | 16(1) | 30(1) | 20(1) | 4(1)  | 2(1) | 1(1)  |
| C(29) | 21(1) | 22(1) | 20(1) | 0(1)  | 6(1) | 4(1)  |
| C(30) | 16(1) | 18(1) | 14(1) | -3(1) | 3(1) | 2(1)  |
| C(31) | 17(1) | 18(1) | 19(1) | 0(1)  | 4(1) | -2(1) |
| C(32) | 15(1) | 22(1) | 19(1) | -2(1) | 2(1) | -1(1) |
| C(33) | 20(1) | 20(1) | 14(1) | -2(1) | 4(1) | 2(1)  |
| C(34) | 18(1) | 21(1) | 19(1) | 2(1)  | 7(1) | 1(1)  |
| C(35) | 15(1) | 20(1) | 20(1) | -2(1) | 6(1) | 0(1)  |

Hydrogen coordinates ( $\times 10^4$ ) and isotropic displacement parameters ( $\text{\AA}^2 \times 10^{-3}$ )  
for Bisazo macrocycle **1**.

|       | x    | y    | z    | U(eq) |
|-------|------|------|------|-------|
| H(2)  | 2269 | 1526 | 3933 | 22    |
| H(3)  | 3276 | 1074 | 2747 | 22    |
| H(5)  | 6088 | 3589 | 4147 | 21    |
| H(6)  | 5115 | 3872 | 5372 | 21    |
| H(8A) | 4758 | -897 | 2283 | 29    |
| H(8B) | 5953 | -880 | 2928 | 29    |
| H(8C) | 5927 | -567 | 1885 | 29    |
| H(9A) | 6970 | 2654 | 2097 | 32    |
| H(9B) | 7095 | 2191 | 3136 | 32    |
| H(9C) | 6576 | 4277 | 2761 | 32    |
| H(11) | 4641 | 5631 | 2291 | 24    |
| H(12) | 3592 | 7278 | 1109 | 25    |
| H(14) | 3606 | 2262 | -380 | 24    |

S101

|        |       |       |      |    |
|--------|-------|-------|------|----|
| H(15)  | 4606  | 588   | 836  | 22 |
| H(22)  | 1586  | 10280 | 245  | 27 |
| H(23)  | 667   | 10791 | 1486 | 25 |
| H(25)  | 198   | 4847  | 1677 | 25 |
| H(26)  | 1187  | 4315  | 483  | 27 |
| H(28A) | -1924 | 8206  | 1733 | 33 |
| H(28B) | -1990 | 7530  | 2731 | 33 |
| H(28C) | -1550 | 5998  | 2049 | 33 |
| H(29A) | -797  | 11097 | 2321 | 31 |
| H(29B) | 407   | 10837 | 2942 | 31 |
| H(29C) | -760  | 10394 | 3327 | 31 |
| H(31)  | 1855  | 8227  | 3242 | 22 |
| H(32)  | 2873  | 6552  | 4437 | 23 |
| H(34)  | -31   | 3638  | 4822 | 23 |
| H(35)  | -1032 | 5256  | 3587 | 21 |

## Trisazo macrocycle 2

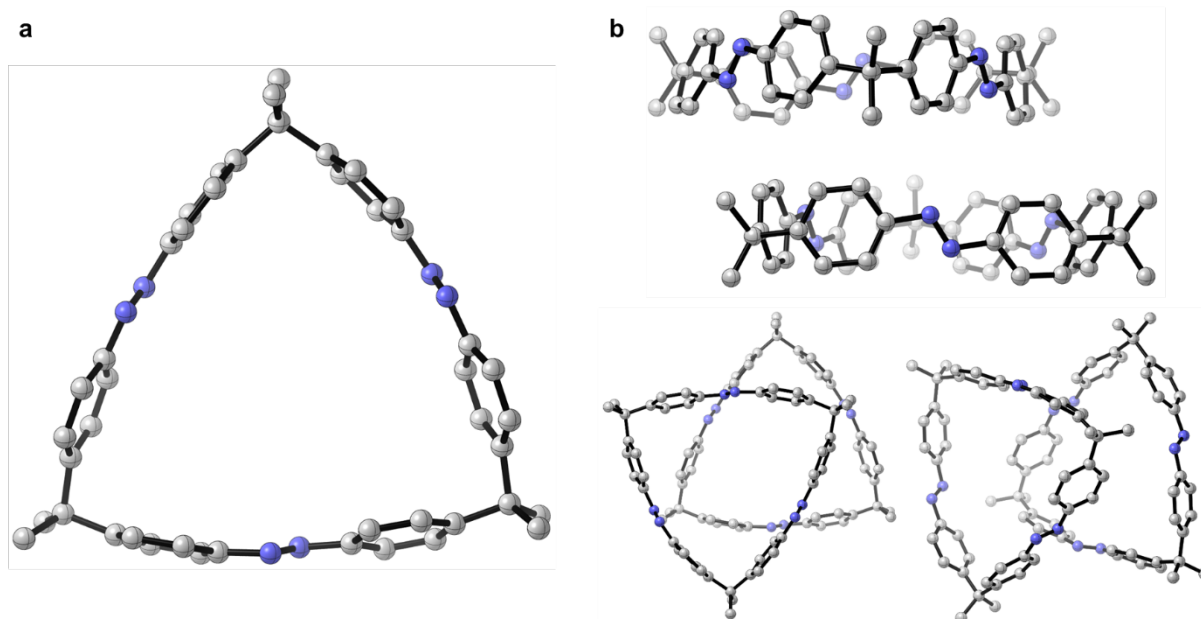

**Figure S13a:** Single crystal structure of trisazo macrocycle **2**. **b:** Crystal packing of trisazo macrocycle **2** (grey: carbon, blue: nitrogen; hydrogens omitted).

The unit cell of Trisazo macrocycle **2** was determined using 9869 reflections and the structure was solved in the triclinic space group  $P\bar{1}$ . The asymmetric unit contains one molecule of Trisazo macrocycle **2**, half of a pentane molecule and other, heavily disordered solvent S102

molecules. One of the three diphenyl-azo parts of the molecule was found to be disordered over two positions. The disorder was modeled with the help of similarity restraints on anisotropic displacement parameters, advanced rigid bond restraints<sup>[16]</sup> and same distance restraints on 1,2 and 1,3 distances.<sup>[17]</sup> The disorder ratio was allowed to refine freely and converged to 0.554(6). The pentane molecule was found to be disordered over the inversion center and was modeled using the SHELX negative PART instruction to suppress the binding to its symmetry equivalent. The full molecule was refined half occupied over two positions using the restraints already mentioned. Additionally all anisotropic displacement parameters for the pentane molecule were set to the same parameters. This disorder ratio was also allowed to refine freely and converged to 0.64(2). It was not possible to find a reasonable disorder model for the other, heavily disordered solvent molecules. SQUEEZE<sup>[18]</sup> as implemented in PLATON<sup>[19]</sup> was used to include a model for these solvent molecules. The obtained model was added as .fab-file to the refinement using SHELXL. SQUEEZE found one independent void with disordered solvent, located at 0.0 0.5 0.5, with a volume of 354 Å<sup>3</sup>. The equivalent of 90 electrons were identified in the void. This could e.g. correspond to about two molecules of CH<sub>2</sub>Cl<sub>2</sub> in the unit cell.

Crystal data and structure refinement for Trisazo macrocycle **2**.

|                                 |                                                  |                           |
|---------------------------------|--------------------------------------------------|---------------------------|
| CCDC No                         | 1902882                                          |                           |
| Empirical formula               | C <sub>47.5</sub> H <sub>48</sub> N <sub>6</sub> |                           |
| Formula weight                  | 702.92                                           |                           |
| Temperature                     | 100(2) K                                         |                           |
| Wavelength                      | 0.71073 Å                                        |                           |
| Crystal system                  | Triclinic                                        |                           |
| Space group                     | <i>P</i> $\bar{1}$                               |                           |
| Unit cell dimensions            | a = 11.3008(6) Å                                 | $\alpha$ = 111.0170(19)°. |
|                                 | b = 14.1002(7) Å                                 | $\beta$ = 100.7420(19)°.  |
|                                 | c = 15.7086(8) Å                                 | $\gamma$ = 102.7284(19)°. |
| Volume                          | 2180.2(2) Å <sup>3</sup>                         |                           |
| Z                               | 2                                                |                           |
| Density (calculated)            | 1.071 Mg/m <sup>3</sup>                          |                           |
| Absorption coefficient          | 0.064 mm <sup>-1</sup>                           |                           |
| F(000)                          | 750                                              |                           |
| Crystal size                    | 0.208 x 0.157 x 0.155 mm <sup>3</sup>            |                           |
| Theta range for data collection | 2.487 to 28.699°.                                |                           |
| Index ranges                    | -15 ≤ h ≤ 15, -19 ≤ k ≤ 19, -21 ≤ l ≤ 21         |                           |
| Reflections collected           | 97608                                            |                           |



|                                 |                                    |
|---------------------------------|------------------------------------|
| Independent reflections         | 11267 [R(int) = 0.0633]            |
| Completeness to theta = 25.242° | 99.9 %                             |
| Absorption correction           | Semi-empirical from equivalents    |
| Refinement method               | Full-matrix least-squares on $F^2$ |
| Data / restraints / parameters  | 11267 / 1550 / 634                 |
| Goodness-of-fit on $F^2$        | 1.029                              |
| Final R indices [I>2sigma(I)]   | R1 = 0.0564, wR2 = 0.1355          |
| R indices (all data)            | R1 = 0.0811, wR2 = 0.1474          |
| Largest diff. peak and hole     | 0.312 and -0.370 e.Å <sup>-3</sup> |

Atomic coordinates (  $\times 10^4$ ) and equivalent isotropic displacement parameters ( $\text{Å}^2 \times 10^3$ )  
for Trisazo macrocycle **2**. U(eq) is defined as one third of the trace of the orthogonalized  $U^{ij}$  tensor.

|       | x        | y        | z       | U(eq) |
|-------|----------|----------|---------|-------|
| N(1)  | 7827(1)  | 6138(1)  | 3239(1) | 21(1) |
| N(2)  | 6650(1)  | 5971(1)  | 3110(1) | 22(1) |
| N(3)  | 10074(1) | 6596(1)  | 8651(1) | 22(1) |
| N(4)  | 10916(1) | 6681(1)  | 8243(1) | 24(1) |
| C(1)  | 8594(1)  | 7129(1)  | 4021(1) | 19(1) |
| C(2)  | 8132(1)  | 7810(1)  | 4663(1) | 27(1) |
| C(3)  | 8967(1)  | 8684(1)  | 5457(1) | 26(1) |
| C(4)  | 10279(1) | 8906(1)  | 5643(1) | 18(1) |
| C(5)  | 10720(1) | 8246(1)  | 4969(1) | 24(1) |
| C(6)  | 9891(1)  | 7363(1)  | 4169(1) | 24(1) |
| C(7)  | 11182(1) | 9748(1)  | 6620(1) | 18(1) |
| C(8)  | 10647(2) | 10660(1) | 7052(1) | 25(1) |
| C(9)  | 12491(1) | 10265(1) | 6549(1) | 23(1) |
| C(10) | 11292(1) | 9098(1)  | 7223(1) | 18(1) |
| C(11) | 11957(2) | 8358(1)  | 7032(1) | 26(1) |
| C(12) | 11878(2) | 7619(1)  | 7424(1) | 28(1) |
| C(13) | 11130(1) | 7600(1)  | 8028(1) | 22(1) |
| C(14) | 10557(1) | 8392(1)  | 8298(1) | 24(1) |
| C(15) | 10635(1) | 9131(1)  | 7896(1) | 22(1) |
| C(21) | 9722(1)  | 5594(1)  | 8727(1) | 19(1) |
| C(22) | 8901(1)  | 5508(1)  | 9272(1) | 19(1) |
| C(23) | 8355(1)  | 4528(1)  | 9280(1) | 18(1) |
| C(24) | 8604(1)  | 3613(1)  | 8735(1) | 16(1) |

|        |          |          |          |       |
|--------|----------|----------|----------|-------|
| C(25)  | 9495(1)  | 3726(1)  | 8233(1)  | 19(1) |
| C(26)  | 10052(1) | 4700(1)  | 8227(1)  | 21(1) |
| C(27)  | 7822(1)  | 2480(1)  | 8560(1)  | 16(1) |
| C(28)  | 7001(1)  | 2487(1)  | 9238(1)  | 23(1) |
| C(29)  | 8690(1)  | 1814(1)  | 8698(1)  | 23(1) |
| C(41)  | 5892(1)  | 4931(1)  | 2408(1)  | 20(1) |
| C(42)  | 6379(1)  | 4120(1)  | 1960(1)  | 22(1) |
| C(43)  | 5560(1)  | 3099(1)  | 1377(1)  | 20(1) |
| C(44)  | 4244(1)  | 2854(1)  | 1217(1)  | 17(1) |
| C(45)  | 3776(1)  | 3691(1)  | 1628(1)  | 22(1) |
| C(46)  | 4590(1)  | 4717(1)  | 2224(1)  | 24(1) |
| C(47)  | 3390(1)  | 1677(1)  | 743(1)   | 18(1) |
| C(48)  | 3820(2)  | 985(1)   | -68(1)   | 27(1) |
| C(49)  | 2000(1)  | 1559(1)  | 309(1)   | 25(1) |
| N(5)   | 5364(3)  | 1202(2)  | 4597(3)  | 18(1) |
| N(6)   | 4380(3)  | 1449(2)  | 4377(2)  | 20(1) |
| C(30)  | 7022(14) | 1999(14) | 7498(5)  | 14(1) |
| C(31)  | 7292(8)  | 1236(7)  | 6778(5)  | 11(1) |
| C(32)  | 6674(6)  | 958(5)   | 5829(4)  | 14(1) |
| C(33)  | 5801(4)  | 1432(4)  | 5587(3)  | 14(1) |
| C(34)  | 5476(6)  | 2159(5)  | 6299(4)  | 19(1) |
| C(35)  | 6078(12) | 2426(11) | 7241(5)  | 21(1) |
| C(50)  | 3472(17) | 1405(14) | 1620(8)  | 16(1) |
| C(51)  | 4277(7)  | 847(5)   | 1831(4)  | 19(1) |
| C(52)  | 4556(4)  | 792(3)   | 2717(3)  | 17(1) |
| C(53)  | 4027(4)  | 1314(3)  | 3405(2)  | 16(1) |
| C(54)  | 3147(4)  | 1801(3)  | 3182(2)  | 21(1) |
| C(55)  | 2876(6)  | 1840(7)  | 2302(4)  | 20(1) |
| N(5A)  | 4755(4)  | 1537(3)  | 4811(3)  | 20(1) |
| N(6A)  | 5116(3)  | 1064(2)  | 4106(3)  | 19(1) |
| C(30A) | 6914(19) | 2076(18) | 7549(7)  | 16(2) |
| C(31A) | 7080(11) | 1360(10) | 6735(7)  | 18(2) |
| C(32A) | 6382(7)  | 1144(6)  | 5815(5)  | 18(1) |
| C(33A) | 5481(6)  | 1639(5)  | 5708(4)  | 15(1) |
| C(34A) | 5260(7)  | 2326(7)  | 6508(5)  | 20(1) |
| C(35A) | 5992(14) | 2559(13) | 7410(6)  | 17(2) |
| C(50A) | 3620(20) | 1291(19) | 1549(11) | 18(2) |
| C(51A) | 4382(9)  | 647(7)   | 1597(5)  | 17(1) |
| C(52A) | 4788(5)  | 538(4)   | 2434(4)  | 18(1) |

|        |          |          |          |       |
|--------|----------|----------|----------|-------|
| C(53A) | 4452(5)  | 1072(4)  | 3238(3)  | 16(1) |
| C(54A) | 3608(6)  | 1643(4)  | 3180(3)  | 20(1) |
| C(55A) | 3204(8)  | 1743(8)  | 2334(6)  | 23(1) |
| C(1S)  | 6496(11) | 6983(9)  | 1413(8)  | 23(1) |
| C(2S)  | 6203(14) | 5893(10) | 658(9)   | 23(1) |
| C(3S)  | 4850(15) | 5315(10) | 132(12)  | 23(1) |
| C(4S)  | 4608(13) | 4120(12) | -497(11) | 23(1) |
| C(5S)  | 3207(11) | 3525(10) | -925(10) | 23(1) |
| C(1T)  | 6999(7)  | 6374(6)  | 1037(5)  | 23(1) |
| C(2T)  | 5537(8)  | 5970(7)  | 622(6)   | 23(1) |
| C(3T)  | 5154(8)  | 4839(6)  | -126(6)  | 23(1) |
| C(4T)  | 3724(6)  | 4332(5)  | -507(5)  | 23(1) |
| C(5T)  | 3301(7)  | 3237(6)  | -1231(5) | 23(1) |

Bond lengths [Å] and angles [°] for Trisazo macrocycle **2**.

|             |            |             |            |
|-------------|------------|-------------|------------|
| N(1)-N(2)   | 1.2621(17) | C(8)-H(8AC) | 0.9800     |
| N(1)-C(1)   | 1.4313(18) | C(9)-H(9A)  | 0.9800     |
| N(2)-C(41)  | 1.4265(18) | C(9)-H(9AB) | 0.9800     |
| N(3)-N(4)   | 1.2506(17) | C(9)-H(9AC) | 0.9800     |
| N(3)-C(21)  | 1.4344(18) | C(10)-C(15) | 1.394(2)   |
| N(4)-C(13)  | 1.4352(19) | C(10)-C(11) | 1.397(2)   |
| C(1)-C(6)   | 1.384(2)   | C(11)-C(12) | 1.383(2)   |
| C(1)-C(2)   | 1.392(2)   | C(11)-H(11) | 0.9500     |
| C(2)-C(3)   | 1.383(2)   | C(12)-C(13) | 1.386(2)   |
| C(2)-H(2)   | 0.9500     | C(12)-H(12) | 0.9500     |
| C(3)-C(4)   | 1.396(2)   | C(13)-C(14) | 1.389(2)   |
| C(3)-H(3)   | 0.9500     | C(14)-C(15) | 1.394(2)   |
| C(4)-C(5)   | 1.389(2)   | C(14)-H(14) | 0.9500     |
| C(4)-C(7)   | 1.5431(19) | C(15)-H(15) | 0.9500     |
| C(5)-C(6)   | 1.390(2)   | C(21)-C(22) | 1.388(2)   |
| C(5)-H(5)   | 0.9500     | C(21)-C(26) | 1.398(2)   |
| C(6)-H(6)   | 0.9500     | C(22)-C(23) | 1.3887(19) |
| C(7)-C(8)   | 1.534(2)   | C(22)-H(22) | 0.9500     |
| C(7)-C(9)   | 1.541(2)   | C(23)-C(24) | 1.391(2)   |
| C(7)-C(10)  | 1.5425(18) | C(23)-H(23) | 0.9500     |
| C(8)-H(8A)  | 0.9800     | C(24)-C(25) | 1.4063(19) |
| C(8)-H(8AB) | 0.9800     | C(24)-C(27) | 1.5430(18) |

|              |            |               |           |
|--------------|------------|---------------|-----------|
| C(25)-C(26)  | 1.383(2)   | C(31)-C(32)   | 1.391(6)  |
| C(25)-H(25)  | 0.9500     | C(31)-H(31)   | 0.9500    |
| C(26)-H(26)  | 0.9500     | C(32)-C(33)   | 1.378(4)  |
| C(27)-C(28)  | 1.5365(19) | C(32)-H(32)   | 0.9500    |
| C(27)-C(29)  | 1.5372(19) | C(33)-C(34)   | 1.390(5)  |
| C(27)-C(30A) | 1.544(9)   | C(34)-C(35)   | 1.381(7)  |
| C(27)-C(30)  | 1.554(6)   | C(34)-H(34)   | 0.9500    |
| C(28)-H(28A) | 0.9800     | C(35)-H(35)   | 0.9500    |
| C(28)-H(28B) | 0.9800     | C(50)-C(51)   | 1.395(7)  |
| C(28)-H(28C) | 0.9800     | C(50)-C(55)   | 1.399(7)  |
| C(29)-H(29A) | 0.9800     | C(51)-C(52)   | 1.402(6)  |
| C(29)-H(29B) | 0.9800     | C(51)-H(51)   | 0.9500    |
| C(29)-H(29C) | 0.9800     | C(52)-C(53)   | 1.389(5)  |
| C(41)-C(46)  | 1.387(2)   | C(52)-H(52)   | 0.9500    |
| C(41)-C(42)  | 1.396(2)   | C(53)-C(54)   | 1.388(5)  |
| C(42)-C(43)  | 1.386(2)   | C(54)-C(55)   | 1.383(6)  |
| C(42)-H(42)  | 0.9500     | C(54)-H(54)   | 0.9500    |
| C(43)-C(44)  | 1.4018(19) | C(55)-H(55)   | 0.9500    |
| C(43)-H(43)  | 0.9500     | N(5A)-N(6A)   | 1.263(6)  |
| C(44)-C(45)  | 1.395(2)   | N(5A)-C(33A)  | 1.432(7)  |
| C(44)-C(47)  | 1.5426(19) | N(6A)-C(53A)  | 1.434(6)  |
| C(45)-C(46)  | 1.392(2)   | C(30A)-C(35A) | 1.389(10) |
| C(45)-H(45)  | 0.9500     | C(30A)-C(31A) | 1.392(10) |
| C(46)-H(46)  | 0.9500     | C(31A)-C(32A) | 1.399(9)  |
| C(47)-C(48)  | 1.535(2)   | C(31A)-H(31A) | 0.9500    |
| C(47)-C(49)  | 1.5369(19) | C(32A)-C(33A) | 1.372(6)  |
| C(47)-C(50A) | 1.550(9)   | C(32A)-H(32A) | 0.9500    |
| C(47)-C(50)  | 1.550(7)   | C(33A)-C(34A) | 1.389(6)  |
| C(48)-H(48A) | 0.9800     | C(34A)-C(35A) | 1.382(9)  |
| C(48)-H(48B) | 0.9800     | C(34A)-H(34A) | 0.9500    |
| C(48)-H(48C) | 0.9800     | C(35A)-H(35A) | 0.9500    |
| C(49)-H(49A) | 0.9800     | C(50A)-C(51A) | 1.391(9)  |
| C(49)-H(49B) | 0.9800     | C(50A)-C(55A) | 1.393(9)  |
| C(49)-H(49C) | 0.9800     | C(51A)-C(52A) | 1.384(8)  |
| N(5)-N(6)    | 1.262(4)   | C(51A)-H(51A) | 0.9500    |
| N(5)-C(33)   | 1.431(5)   | C(52A)-C(53A) | 1.388(6)  |
| N(6)-C(53)   | 1.435(5)   | C(52A)-H(52A) | 0.9500    |
| C(30)-C(31)  | 1.389(8)   | C(53A)-C(54A) | 1.387(6)  |
| C(30)-C(35)  | 1.400(8)   | C(54A)-C(55A) | 1.389(8)  |

|                 |            |                    |            |
|-----------------|------------|--------------------|------------|
| C(54A)-H(54A)   | 0.9500     | C(6)-C(1)-C(2)     | 119.15(13) |
| C(55A)-H(55A)   | 0.9500     | C(6)-C(1)-N(1)     | 116.04(13) |
| C(1S)-C(2S)     | 1.483(10)  | C(2)-C(1)-N(1)     | 124.63(13) |
| C(1S)-H(1SA)    | 0.9800     | C(3)-C(2)-C(1)     | 119.93(14) |
| C(1S)-H(1SB)    | 0.9800     | C(3)-C(2)-H(2)     | 120.0      |
| C(1S)-H(1SC)    | 0.9800     | C(1)-C(2)-H(2)     | 120.0      |
| C(2S)-C(3S)     | 1.477(12)  | C(2)-C(3)-C(4)     | 121.75(14) |
| C(2S)-H(2SA)    | 0.9900     | C(2)-C(3)-H(3)     | 119.1      |
| C(2S)-H(2SB)    | 0.9900     | C(4)-C(3)-H(3)     | 119.1      |
| C(3S)-C(4S)     | 1.546(12)  | C(5)-C(4)-C(3)     | 117.32(13) |
| C(3S)-H(3SA)    | 0.9900     | C(5)-C(4)-C(7)     | 121.46(12) |
| C(3S)-H(3SB)    | 0.9900     | C(3)-C(4)-C(7)     | 120.67(13) |
| C(4S)-C(5S)     | 1.509(11)  | C(4)-C(5)-C(6)     | 121.43(13) |
| C(4S)-H(4SA)    | 0.9900     | C(4)-C(5)-H(5)     | 119.3      |
| C(4S)-H(4SB)    | 0.9900     | C(6)-C(5)-H(5)     | 119.3      |
| C(5S)-H(5SA)    | 0.9800     | C(1)-C(6)-C(5)     | 120.28(14) |
| C(5S)-H(5SB)    | 0.9800     | C(1)-C(6)-H(6)     | 119.9      |
| C(5S)-H(5SC)    | 0.9800     | C(5)-C(6)-H(6)     | 119.9      |
| C(1T)-C(2T)     | 1.549(8)   | C(8)-C(7)-C(9)     | 106.70(12) |
| C(1T)-H(1TA)    | 0.9800     | C(8)-C(7)-C(10)    | 112.09(12) |
| C(1T)-H(1TB)    | 0.9800     | C(9)-C(7)-C(10)    | 111.09(11) |
| C(1T)-H(1TC)    | 0.9800     | C(8)-C(7)-C(4)     | 111.46(11) |
| C(2T)-C(3T)     | 1.508(7)   | C(9)-C(7)-C(4)     | 112.22(11) |
| C(2T)-H(2TA)    | 0.9900     | C(10)-C(7)-C(4)    | 103.41(11) |
| C(2T)-H(2TB)    | 0.9900     | C(7)-C(8)-H(8A)    | 109.5      |
| C(3T)-C(4T)     | 1.518(8)   | C(7)-C(8)-H(8AB)   | 109.5      |
| C(3T)-H(3TA)    | 0.9900     | H(8A)-C(8)-H(8AB)  | 109.5      |
| C(3T)-H(3TB)    | 0.9900     | C(7)-C(8)-H(8AC)   | 109.5      |
| C(4T)-C(5T)     | 1.455(7)   | H(8A)-C(8)-H(8AC)  | 109.5      |
| C(4T)-H(4TA)    | 0.9900     | H(8AB)-C(8)-H(8AC) | 109.5      |
| C(4T)-H(4TB)    | 0.9900     | C(7)-C(9)-H(9A)    | 109.5      |
| C(5T)-H(5TA)    | 0.9800     | C(7)-C(9)-H(9AB)   | 109.5      |
| C(5T)-H(5TB)    | 0.9800     | H(9A)-C(9)-H(9AB)  | 109.5      |
| C(5T)-H(5TC)    | 0.9800     | C(7)-C(9)-H(9AC)   | 109.5      |
|                 |            | H(9A)-C(9)-H(9AC)  | 109.5      |
| N(2)-N(1)-C(1)  | 114.04(12) | H(9AB)-C(9)-H(9AC) | 109.5      |
| N(1)-N(2)-C(41) | 113.90(12) | C(15)-C(10)-C(11)  | 117.16(13) |
| N(4)-N(3)-C(21) | 113.52(12) | C(15)-C(10)-C(7)   | 122.50(12) |
| N(3)-N(4)-C(13) | 113.81(12) | C(11)-C(10)-C(7)   | 119.97(12) |

|                    |            |                     |            |
|--------------------|------------|---------------------|------------|
| C(12)-C(11)-C(10)  | 121.74(14) | C(28)-C(27)-C(30)   | 112.8(7)   |
| C(12)-C(11)-H(11)  | 119.1      | C(29)-C(27)-C(30)   | 110.0(4)   |
| C(10)-C(11)-H(11)  | 119.1      | C(24)-C(27)-C(30)   | 103.2(8)   |
| C(11)-C(12)-C(13)  | 120.23(14) | C(27)-C(28)-H(28A)  | 109.5      |
| C(11)-C(12)-H(12)  | 119.9      | C(27)-C(28)-H(28B)  | 109.5      |
| C(13)-C(12)-H(12)  | 119.9      | H(28A)-C(28)-H(28B) | 109.5      |
| C(12)-C(13)-C(14)  | 118.93(14) | C(27)-C(28)-H(28C)  | 109.5      |
| C(12)-C(13)-N(4)   | 115.49(14) | H(28A)-C(28)-H(28C) | 109.5      |
| C(14)-C(13)-N(4)   | 125.28(13) | H(28B)-C(28)-H(28C) | 109.5      |
| C(13)-C(14)-C(15)  | 120.22(14) | C(27)-C(29)-H(29A)  | 109.5      |
| C(13)-C(14)-H(14)  | 119.9      | C(27)-C(29)-H(29B)  | 109.5      |
| C(15)-C(14)-H(14)  | 119.9      | H(29A)-C(29)-H(29B) | 109.5      |
| C(10)-C(15)-C(14)  | 121.20(14) | C(27)-C(29)-H(29C)  | 109.5      |
| C(10)-C(15)-H(15)  | 119.4      | H(29A)-C(29)-H(29C) | 109.5      |
| C(14)-C(15)-H(15)  | 119.4      | H(29B)-C(29)-H(29C) | 109.5      |
| C(22)-C(21)-C(26)  | 119.48(13) | C(46)-C(41)-C(42)   | 119.51(13) |
| C(22)-C(21)-N(3)   | 115.81(13) | C(46)-C(41)-N(2)    | 116.05(13) |
| C(26)-C(21)-N(3)   | 124.43(13) | C(42)-C(41)-N(2)    | 124.28(13) |
| C(21)-C(22)-C(23)  | 120.50(13) | C(43)-C(42)-C(41)   | 119.64(13) |
| C(21)-C(22)-H(22)  | 119.8      | C(43)-C(42)-H(42)   | 120.2      |
| C(23)-C(22)-H(22)  | 119.8      | C(41)-C(42)-H(42)   | 120.2      |
| C(22)-C(23)-C(24)  | 120.86(13) | C(42)-C(43)-C(44)   | 121.70(13) |
| C(22)-C(23)-H(23)  | 119.6      | C(42)-C(43)-H(43)   | 119.1      |
| C(24)-C(23)-H(23)  | 119.6      | C(44)-C(43)-H(43)   | 119.1      |
| C(23)-C(24)-C(25)  | 117.87(12) | C(45)-C(44)-C(43)   | 117.55(13) |
| C(23)-C(24)-C(27)  | 122.48(12) | C(45)-C(44)-C(47)   | 121.60(12) |
| C(25)-C(24)-C(27)  | 119.16(12) | C(43)-C(44)-C(47)   | 120.12(12) |
| C(26)-C(25)-C(24)  | 121.56(13) | C(46)-C(45)-C(44)   | 121.17(13) |
| C(26)-C(25)-H(25)  | 119.2      | C(46)-C(45)-H(45)   | 119.4      |
| C(24)-C(25)-H(25)  | 119.2      | C(44)-C(45)-H(45)   | 119.4      |
| C(25)-C(26)-C(21)  | 119.48(13) | C(41)-C(46)-C(45)   | 120.26(14) |
| C(25)-C(26)-H(26)  | 120.3      | C(41)-C(46)-H(46)   | 119.9      |
| C(21)-C(26)-H(26)  | 120.3      | C(45)-C(46)-H(46)   | 119.9      |
| C(28)-C(27)-C(29)  | 106.83(11) | C(48)-C(47)-C(49)   | 106.70(11) |
| C(28)-C(27)-C(24)  | 112.97(11) | C(48)-C(47)-C(44)   | 111.99(11) |
| C(29)-C(27)-C(24)  | 111.10(11) | C(49)-C(47)-C(44)   | 112.30(12) |
| C(28)-C(27)-C(30A) | 107.3(9)   | C(48)-C(47)-C(50A)  | 107.0(4)   |
| C(29)-C(27)-C(30A) | 116.6(5)   | C(49)-C(47)-C(50A)  | 115.3(8)   |
| C(24)-C(27)-C(30A) | 102.1(10)  | C(44)-C(47)-C(50A)  | 103.6(10)  |

|                     |          |                      |          |
|---------------------|----------|----------------------|----------|
| C(48)-C(47)-C(50)   | 116.7(4) | C(50)-C(51)-H(51)    | 119.2    |
| C(49)-C(47)-C(50)   | 108.3(6) | C(52)-C(51)-H(51)    | 119.2    |
| C(44)-C(47)-C(50)   | 100.9(8) | C(53)-C(52)-C(51)    | 119.2(3) |
| C(47)-C(48)-H(48A)  | 109.5    | C(53)-C(52)-H(52)    | 120.4    |
| C(47)-C(48)-H(48B)  | 109.5    | C(51)-C(52)-H(52)    | 120.4    |
| H(48A)-C(48)-H(48B) | 109.5    | C(54)-C(53)-C(52)    | 119.9(3) |
| C(47)-C(48)-H(48C)  | 109.5    | C(54)-C(53)-N(6)     | 115.6(4) |
| H(48A)-C(48)-H(48C) | 109.5    | C(52)-C(53)-N(6)     | 124.4(4) |
| H(48B)-C(48)-H(48C) | 109.5    | C(55)-C(54)-C(53)    | 119.9(3) |
| C(47)-C(49)-H(49A)  | 109.5    | C(55)-C(54)-H(54)    | 120.1    |
| C(47)-C(49)-H(49B)  | 109.5    | C(53)-C(54)-H(54)    | 120.1    |
| H(49A)-C(49)-H(49B) | 109.5    | C(54)-C(55)-C(50)    | 121.8(5) |
| C(47)-C(49)-H(49C)  | 109.5    | C(54)-C(55)-H(55)    | 119.1    |
| H(49A)-C(49)-H(49C) | 109.5    | C(50)-C(55)-H(55)    | 119.1    |
| H(49B)-C(49)-H(49C) | 109.5    | N(6A)-N(5A)-C(33A)   | 114.7(5) |
| N(6)-N(5)-C(33)     | 113.9(4) | N(5A)-N(6A)-C(53A)   | 113.2(5) |
| N(5)-N(6)-C(53)     | 113.2(4) | C(35A)-C(30A)-C(31A) | 116.7(8) |
| C(31)-C(30)-C(35)   | 118.3(6) | C(35A)-C(30A)-C(27)  | 119.2(8) |
| C(31)-C(30)-C(27)   | 122.5(6) | C(31A)-C(30A)-C(27)  | 123.4(9) |
| C(35)-C(30)-C(27)   | 118.9(7) | C(30A)-C(31A)-C(32A) | 122.5(7) |
| C(30)-C(31)-C(32)   | 119.8(5) | C(30A)-C(31A)-H(31A) | 118.8    |
| C(30)-C(31)-H(31)   | 120.1    | C(32A)-C(31A)-H(31A) | 118.8    |
| C(32)-C(31)-H(31)   | 120.1    | C(33A)-C(32A)-C(31A) | 118.9(6) |
| C(33)-C(32)-C(31)   | 121.1(4) | C(33A)-C(32A)-H(32A) | 120.5    |
| C(33)-C(32)-H(32)   | 119.5    | C(31A)-C(32A)-H(32A) | 120.5    |
| C(31)-C(32)-H(32)   | 119.5    | C(32A)-C(33A)-C(34A) | 119.9(5) |
| C(32)-C(33)-C(34)   | 119.8(4) | C(32A)-C(33A)-N(5A)  | 124.6(5) |
| C(32)-C(33)-N(5)    | 116.2(4) | C(34A)-C(33A)-N(5A)  | 115.5(5) |
| C(34)-C(33)-N(5)    | 123.8(4) | C(35A)-C(34A)-C(33A) | 120.2(6) |
| C(35)-C(34)-C(33)   | 119.0(5) | C(35A)-C(34A)-H(34A) | 119.9    |
| C(35)-C(34)-H(34)   | 120.5    | C(33A)-C(34A)-H(34A) | 119.9    |
| C(33)-C(34)-H(34)   | 120.5    | C(34A)-C(35A)-C(30A) | 121.7(7) |
| C(34)-C(35)-C(30)   | 121.8(6) | C(34A)-C(35A)-H(35A) | 119.2    |
| C(34)-C(35)-H(35)   | 119.1    | C(30A)-C(35A)-H(35A) | 119.2    |
| C(30)-C(35)-H(35)   | 119.1    | C(51A)-C(50A)-C(55A) | 118.1(7) |
| C(51)-C(50)-C(55)   | 117.2(5) | C(51A)-C(50A)-C(47)  | 123.6(7) |
| C(51)-C(50)-C(47)   | 121.6(6) | C(55A)-C(50A)-C(47)  | 117.6(8) |
| C(55)-C(50)-C(47)   | 120.7(6) | C(52A)-C(51A)-C(50A) | 120.3(6) |
| C(50)-C(51)-C(52)   | 121.7(5) | C(52A)-C(51A)-H(51A) | 119.9    |

|                      |           |                     |          |
|----------------------|-----------|---------------------|----------|
| C(50A)-C(51A)-H(51A) | 119.9     | C(4S)-C(5S)-H(5SA)  | 109.5    |
| C(51A)-C(52A)-C(53A) | 120.7(4)  | C(4S)-C(5S)-H(5SB)  | 109.5    |
| C(51A)-C(52A)-H(52A) | 119.7     | H(5SA)-C(5S)-H(5SB) | 109.5    |
| C(53A)-C(52A)-H(52A) | 119.7     | C(4S)-C(5S)-H(5SC)  | 109.5    |
| C(54A)-C(53A)-C(52A) | 119.8(4)  | H(5SA)-C(5S)-H(5SC) | 109.5    |
| C(54A)-C(53A)-N(6A)  | 124.4(5)  | H(5SB)-C(5S)-H(5SC) | 109.5    |
| C(52A)-C(53A)-N(6A)  | 115.6(5)  | C(2T)-C(1T)-H(1TA)  | 109.5    |
| C(53A)-C(54A)-C(55A) | 118.7(4)  | C(2T)-C(1T)-H(1TB)  | 109.5    |
| C(53A)-C(54A)-H(54A) | 120.6     | H(1TA)-C(1T)-H(1TB) | 109.5    |
| C(55A)-C(54A)-H(54A) | 120.6     | C(2T)-C(1T)-H(1TC)  | 109.5    |
| C(54A)-C(55A)-C(50A) | 121.9(6)  | H(1TA)-C(1T)-H(1TC) | 109.5    |
| C(54A)-C(55A)-H(55A) | 119.0     | H(1TB)-C(1T)-H(1TC) | 109.5    |
| C(50A)-C(55A)-H(55A) | 119.0     | C(3T)-C(2T)-C(1T)   | 108.1(7) |
| C(2S)-C(1S)-H(1SA)   | 109.5     | C(3T)-C(2T)-H(2TA)  | 110.1    |
| C(2S)-C(1S)-H(1SB)   | 109.5     | C(1T)-C(2T)-H(2TA)  | 110.1    |
| H(1SA)-C(1S)-H(1SB)  | 109.5     | C(3T)-C(2T)-H(2TB)  | 110.1    |
| C(2S)-C(1S)-H(1SC)   | 109.5     | C(1T)-C(2T)-H(2TB)  | 110.1    |
| H(1SA)-C(1S)-H(1SC)  | 109.5     | H(2TA)-C(2T)-H(2TB) | 108.4    |
| H(1SB)-C(1S)-H(1SC)  | 109.5     | C(2T)-C(3T)-C(4T)   | 112.1(5) |
| C(3S)-C(2S)-C(1S)    | 116.3(9)  | C(2T)-C(3T)-H(3TA)  | 109.2    |
| C(3S)-C(2S)-H(2SA)   | 108.2     | C(4T)-C(3T)-H(3TA)  | 109.2    |
| C(1S)-C(2S)-H(2SA)   | 108.2     | C(2T)-C(3T)-H(3TB)  | 109.2    |
| C(3S)-C(2S)-H(2SB)   | 108.2     | C(4T)-C(3T)-H(3TB)  | 109.2    |
| C(1S)-C(2S)-H(2SB)   | 108.2     | H(3TA)-C(3T)-H(3TB) | 107.9    |
| H(2SA)-C(2S)-H(2SB)  | 107.4     | C(5T)-C(4T)-C(3T)   | 114.4(5) |
| C(2S)-C(3S)-C(4S)    | 112.7(10) | C(5T)-C(4T)-H(4TA)  | 108.7    |
| C(2S)-C(3S)-H(3SA)   | 109.1     | C(3T)-C(4T)-H(4TA)  | 108.7    |
| C(4S)-C(3S)-H(3SA)   | 109.1     | C(5T)-C(4T)-H(4TB)  | 108.7    |
| C(2S)-C(3S)-H(3SB)   | 109.1     | C(3T)-C(4T)-H(4TB)  | 108.7    |
| C(4S)-C(3S)-H(3SB)   | 109.1     | H(4TA)-C(4T)-H(4TB) | 107.6    |
| H(3SA)-C(3S)-H(3SB)  | 107.8     | C(4T)-C(5T)-H(5TA)  | 109.5    |
| C(5S)-C(4S)-C(3S)    | 111.2(13) | C(4T)-C(5T)-H(5TB)  | 109.5    |
| C(5S)-C(4S)-H(4SA)   | 109.4     | H(5TA)-C(5T)-H(5TB) | 109.5    |
| C(3S)-C(4S)-H(4SA)   | 109.4     | C(4T)-C(5T)-H(5TC)  | 109.5    |
| C(5S)-C(4S)-H(4SB)   | 109.4     | H(5TA)-C(5T)-H(5TC) | 109.5    |
| C(3S)-C(4S)-H(4SB)   | 109.4     | H(5TB)-C(5T)-H(5TC) | 109.5    |
| H(4SA)-C(4S)-H(4SB)  | 108.0     |                     |          |



Anisotropic displacement parameters ( $\text{\AA}^2 \times 10^3$ ) for Trisazo macrocycle **2**. The anisotropic displacement factor exponent takes the form:  $-2\pi^2 [ h^2 a^{*2} U^{11} + \dots + 2 h k a^* b^* U^{12} ]$

|       | U <sup>11</sup> | U <sup>22</sup> | U <sup>33</sup> | U <sup>23</sup> | U <sup>13</sup> | U <sup>12</sup> |
|-------|-----------------|-----------------|-----------------|-----------------|-----------------|-----------------|
| N(1)  | 21(1)           | 23(1)           | 18(1)           | 9(1)            | 4(1)            | 5(1)            |
| N(2)  | 21(1)           | 22(1)           | 22(1)           | 10(1)           | 2(1)            | 7(1)            |
| N(3)  | 21(1)           | 25(1)           | 15(1)           | 7(1)            | 1(1)            | 3(1)            |
| N(4)  | 21(1)           | 29(1)           | 23(1)           | 14(1)           | 6(1)            | 8(1)            |
| C(1)  | 23(1)           | 20(1)           | 16(1)           | 9(1)            | 4(1)            | 5(1)            |
| C(2)  | 17(1)           | 34(1)           | 24(1)           | 6(1)            | 1(1)            | 10(1)           |
| C(3)  | 23(1)           | 30(1)           | 22(1)           | 4(1)            | 4(1)            | 14(1)           |
| C(4)  | 21(1)           | 17(1)           | 17(1)           | 9(1)            | 5(1)            | 6(1)            |
| C(5)  | 19(1)           | 25(1)           | 24(1)           | 7(1)            | 9(1)            | 2(1)            |
| C(6)  | 23(1)           | 23(1)           | 21(1)           | 4(1)            | 10(1)           | 4(1)            |
| C(7)  | 21(1)           | 15(1)           | 17(1)           | 7(1)            | 5(1)            | 6(1)            |
| C(8)  | 30(1)           | 19(1)           | 26(1)           | 7(1)            | 7(1)            | 11(1)           |
| C(9)  | 24(1)           | 18(1)           | 25(1)           | 10(1)           | 6(1)            | 3(1)            |
| C(10) | 17(1)           | 16(1)           | 15(1)           | 6(1)            | 1(1)            | 2(1)            |
| C(11) | 28(1)           | 29(1)           | 33(1)           | 19(1)           | 16(1)           | 14(1)           |
| C(12) | 27(1)           | 31(1)           | 39(1)           | 22(1)           | 14(1)           | 14(1)           |
| C(13) | 19(1)           | 25(1)           | 21(1)           | 12(1)           | 1(1)            | 3(1)            |
| C(14) | 23(1)           | 30(1)           | 17(1)           | 10(1)           | 6(1)            | 3(1)            |
| C(15) | 23(1)           | 21(1)           | 19(1)           | 5(1)            | 5(1)            | 6(1)            |
| C(21) | 20(1)           | 20(1)           | 13(1)           | 7(1)            | -2(1)           | 2(1)            |
| C(22) | 19(1)           | 18(1)           | 16(1)           | 5(1)            | 1(1)            | 6(1)            |
| C(23) | 15(1)           | 23(1)           | 14(1)           | 7(1)            | 3(1)            | 6(1)            |
| C(24) | 16(1)           | 19(1)           | 10(1)           | 7(1)            | 0(1)            | 4(1)            |
| C(25) | 22(1)           | 20(1)           | 14(1)           | 5(1)            | 6(1)            | 6(1)            |
| C(26) | 19(1)           | 25(1)           | 14(1)           | 7(1)            | 5(1)            | 2(1)            |
| C(27) | 16(1)           | 19(1)           | 12(1)           | 6(1)            | 3(1)            | 4(1)            |
| C(28) | 26(1)           | 25(1)           | 19(1)           | 11(1)           | 9(1)            | 5(1)            |
| C(29) | 23(1)           | 24(1)           | 23(1)           | 12(1)           | 4(1)            | 9(1)            |
| C(41) | 21(1)           | 21(1)           | 19(1)           | 10(1)           | 3(1)            | 6(1)            |
| C(42) | 16(1)           | 26(1)           | 24(1)           | 11(1)           | 5(1)            | 7(1)            |
| C(43) | 21(1)           | 22(1)           | 21(1)           | 10(1)           | 8(1)            | 9(1)            |
| C(44) | 18(1)           | 22(1)           | 13(1)           | 10(1)           | 2(1)            | 5(1)            |
| C(45) | 16(1)           | 26(1)           | 26(1)           | 13(1)           | 3(1)            | 9(1)            |
| C(46) | 22(1)           | 24(1)           | 27(1)           | 11(1)           | 5(1)            | 12(1)           |

|        |       |       |       |       |       |       |
|--------|-------|-------|-------|-------|-------|-------|
| C(47)  | 18(1) | 22(1) | 12(1) | 8(1)  | 2(1)  | 4(1)  |
| C(48)  | 27(1) | 26(1) | 22(1) | 5(1)  | 6(1)  | 6(1)  |
| C(49)  | 20(1) | 30(1) | 19(1) | 7(1)  | -1(1) | 5(1)  |
| N(5)   | 19(1) | 16(1) | 18(2) | 9(1)  | 1(1)  | 1(1)  |
| N(6)   | 18(1) | 22(1) | 18(2) | 10(1) | 0(1)  | 3(1)  |
| C(30)  | 8(2)  | 19(4) | 13(2) | 8(2)  | 0(2)  | 1(2)  |
| C(31)  | 11(3) | 11(2) | 10(2) | 3(1)  | 2(1)  | 4(2)  |
| C(32)  | 17(2) | 8(2)  | 15(2) | 5(1)  | 4(1)  | 3(1)  |
| C(33)  | 16(2) | 11(2) | 13(2) | 4(1)  | 1(1)  | 3(1)  |
| C(34)  | 20(2) | 19(3) | 18(2) | 6(2)  | 3(2)  | 11(1) |
| C(35)  | 25(2) | 17(3) | 16(2) | -1(2) | 7(2)  | 9(2)  |
| C(50)  | 14(4) | 14(3) | 14(2) | 5(2)  | -1(2) | 1(2)  |
| C(51)  | 19(2) | 16(3) | 17(2) | 3(2)  | 5(2)  | 4(2)  |
| C(52)  | 19(2) | 15(2) | 17(2) | 5(2)  | 2(2)  | 7(1)  |
| C(53)  | 16(2) | 17(2) | 14(1) | 7(1)  | 4(1)  | 5(1)  |
| C(54)  | 21(2) | 28(2) | 20(1) | 14(1) | 7(1)  | 13(1) |
| C(55)  | 18(3) | 32(2) | 15(2) | 14(1) | 4(2)  | 12(2) |
| N(5A)  | 19(2) | 18(2) | 17(2) | 7(1)  | 1(2)  | 2(1)  |
| N(6A)  | 22(2) | 16(1) | 18(2) | 9(1)  | 3(1)  | 3(1)  |
| C(30A) | 22(5) | 12(3) | 14(3) | 5(2)  | 10(2) | 3(3)  |
| C(31A) | 14(3) | 19(3) | 29(3) | 15(2) | 7(2)  | 11(2) |
| C(32A) | 25(4) | 11(3) | 17(2) | 4(2)  | 8(2)  | 6(2)  |
| C(33A) | 17(2) | 10(2) | 17(2) | 6(2)  | 5(2)  | 6(2)  |
| C(34A) | 23(3) | 18(3) | 14(2) | 2(2)  | 2(2)  | 10(2) |
| C(35A) | 19(3) | 18(4) | 9(3)  | 1(3)  | -1(2) | 9(2)  |
| C(50A) | 15(4) | 20(5) | 14(3) | 7(3)  | 2(2)  | -1(2) |
| C(51A) | 22(2) | 14(3) | 11(2) | 2(2)  | 3(2)  | 5(2)  |
| C(52A) | 22(2) | 12(2) | 15(2) | 2(2)  | 3(2)  | 5(1)  |
| C(53A) | 20(2) | 12(2) | 13(2) | 3(2)  | 4(2)  | 6(1)  |
| C(54A) | 27(3) | 24(2) | 18(2) | 11(2) | 10(2) | 17(2) |
| C(55A) | 22(4) | 24(2) | 26(2) | 11(2) | 5(2)  | 12(2) |
| C(1S)  | 36(1) | 25(1) | 24(1) | 16(1) | 20(1) | 22(1) |
| C(2S)  | 36(1) | 25(1) | 24(1) | 16(1) | 20(1) | 22(1) |
| C(3S)  | 36(1) | 25(1) | 24(1) | 16(1) | 20(1) | 22(1) |
| C(4S)  | 36(1) | 25(1) | 24(1) | 16(1) | 20(1) | 22(1) |
| C(5S)  | 36(1) | 25(1) | 24(1) | 16(1) | 20(1) | 22(1) |
| C(1T)  | 36(1) | 25(1) | 24(1) | 16(1) | 20(1) | 22(1) |
| C(2T)  | 36(1) | 25(1) | 24(1) | 16(1) | 20(1) | 22(1) |
| C(3T)  | 36(1) | 25(1) | 24(1) | 16(1) | 20(1) | 22(1) |

|       |       |       |       |       |       |       |
|-------|-------|-------|-------|-------|-------|-------|
| C(4T) | 36(1) | 25(1) | 24(1) | 16(1) | 20(1) | 22(1) |
| C(5T) | 36(1) | 25(1) | 24(1) | 16(1) | 20(1) | 22(1) |

Hydrogen coordinates ( $\times 10^4$ ) and isotropic displacement parameters ( $\text{\AA}^2 \times 10^{-3}$ )  
for Trisazo macrocycle **2**.

|        | x     | y     | z    | U(eq) |
|--------|-------|-------|------|-------|
| H(2)   | 7243  | 7675  | 4555 | 33    |
| H(3)   | 8639  | 9146  | 5889 | 32    |
| H(5)   | 11607 | 8403  | 5056 | 29    |
| H(6)   | 10217 | 6918  | 3723 | 29    |
| H(8A)  | 10575 | 11041 | 6641 | 38    |
| H(8AB) | 11216 | 11158 | 7687 | 38    |
| H(8AC) | 9807  | 10365 | 7105 | 38    |
| H(9A)  | 12877 | 9710  | 6287 | 34    |
| H(9AB) | 13038 | 10781 | 7185 | 34    |
| H(9AC) | 12389 | 10634 | 6130 | 34    |
| H(11)  | 12477 | 8361  | 6622 | 31    |
| H(12)  | 12338 | 7122  | 7280 | 34    |
| H(14)  | 10110 | 8432  | 8759 | 29    |
| H(15)  | 10234 | 9666  | 8083 | 27    |
| H(22)  | 8712  | 6123  | 9642 | 23    |
| H(23)  | 7804  | 4483  | 9662 | 21    |
| H(25)  | 9720  | 3120  | 7890 | 23    |
| H(26)  | 10655 | 4760  | 7885 | 25    |
| H(28A) | 6394  | 2867  | 9143 | 34    |
| H(28B) | 7545  | 2849  | 9899 | 34    |
| H(28C) | 6539  | 1749  | 9103 | 34    |
| H(29A) | 8173  | 1072  | 8498 | 34    |
| H(29B) | 9175  | 2112  | 9371 | 34    |
| H(29C) | 9276  | 1833  | 8311 | 34    |
| H(42)  | 7267  | 4267  | 2055 | 26    |
| H(43)  | 5898  | 2550  | 1077 | 24    |
| H(45)  | 2885  | 3558  | 1499 | 27    |
| H(46)  | 4252  | 5273  | 2507 | 29    |
| H(48A) | 3290  | 238   | -321 | 40    |
| H(48B) | 4708  | 1042  | 177  | 40    |

|        |      |      |       |    |
|--------|------|------|-------|----|
| H(48C) | 3736 | 1235 | -577  | 40 |
| H(49A) | 1940 | 1789 | -212  | 38 |
| H(49B) | 1692 | 2004 | 801   | 38 |
| H(49C) | 1482 | 809  | 63    | 38 |
| H(31)  | 7896 | 905  | 6933  | 13 |
| H(32)  | 6858 | 433  | 5339  | 16 |
| H(34)  | 4848 | 2467 | 6140  | 23 |
| H(35)  | 5846 | 2912 | 7728  | 25 |
| H(51)  | 4645 | 496  | 1363  | 23 |
| H(52)  | 5100 | 402  | 2845  | 21 |
| H(54)  | 2733 | 2107 | 3633  | 25 |
| H(55)  | 2268 | 2171 | 2156  | 24 |
| H(31A) | 7689 | 1005 | 6807  | 22 |
| H(32A) | 6530 | 663  | 5272  | 21 |
| H(34A) | 4603 | 2636 | 6434  | 24 |
| H(35A) | 5862 | 3062 | 7948  | 20 |
| H(51A) | 4623 | 282  | 1053  | 20 |
| H(52A) | 5301 | 92   | 2459  | 22 |
| H(54A) | 3312 | 1959 | 3708  | 24 |
| H(55A) | 2624 | 2132 | 2291  | 28 |
| H(1SA) | 6077 | 7401 | 1153  | 34 |
| H(1SB) | 7415 | 7336 | 1642  | 34 |
| H(1SC) | 6188 | 6933 | 1944  | 34 |
| H(2SA) | 6666 | 5949 | 192   | 27 |
| H(2SB) | 6539 | 5457 | 953   | 27 |
| H(3SA) | 4550 | 5660 | -277  | 27 |
| H(3SB) | 4352 | 5371 | 593   | 27 |
| H(4SA) | 5010 | 4059 | -1015 | 27 |
| H(4SB) | 5001 | 3792 | -107  | 27 |
| H(5SA) | 2860 | 3716 | -1438 | 34 |
| H(5SB) | 2776 | 3719 | -432  | 34 |
| H(5SC) | 3074 | 2753 | -1183 | 34 |
| H(1TA) | 7383 | 6610 | 608   | 34 |
| H(1TB) | 7294 | 5793 | 1102  | 34 |
| H(1TC) | 7246 | 6975 | 1664  | 34 |
| H(2TA) | 5135 | 5990 | 1134  | 27 |
| H(2TB) | 5257 | 6434 | 334   | 27 |
| H(3TA) | 5525 | 4405 | 153   | 27 |
| H(3TB) | 5501 | 4840 | -660  | 27 |

|        |      |      |       |    |
|--------|------|------|-------|----|
| H(4TA) | 3385 | 4341 | 32    | 27 |
| H(4TB) | 3361 | 4774 | -779  | 27 |
| H(5TA) | 2374 | 2957 | -1418 | 34 |
| H(5TB) | 3667 | 2793 | -973  | 34 |
| H(5TC) | 3579 | 3225 | -1789 | 34 |

## Tetraazo macrocycle 3

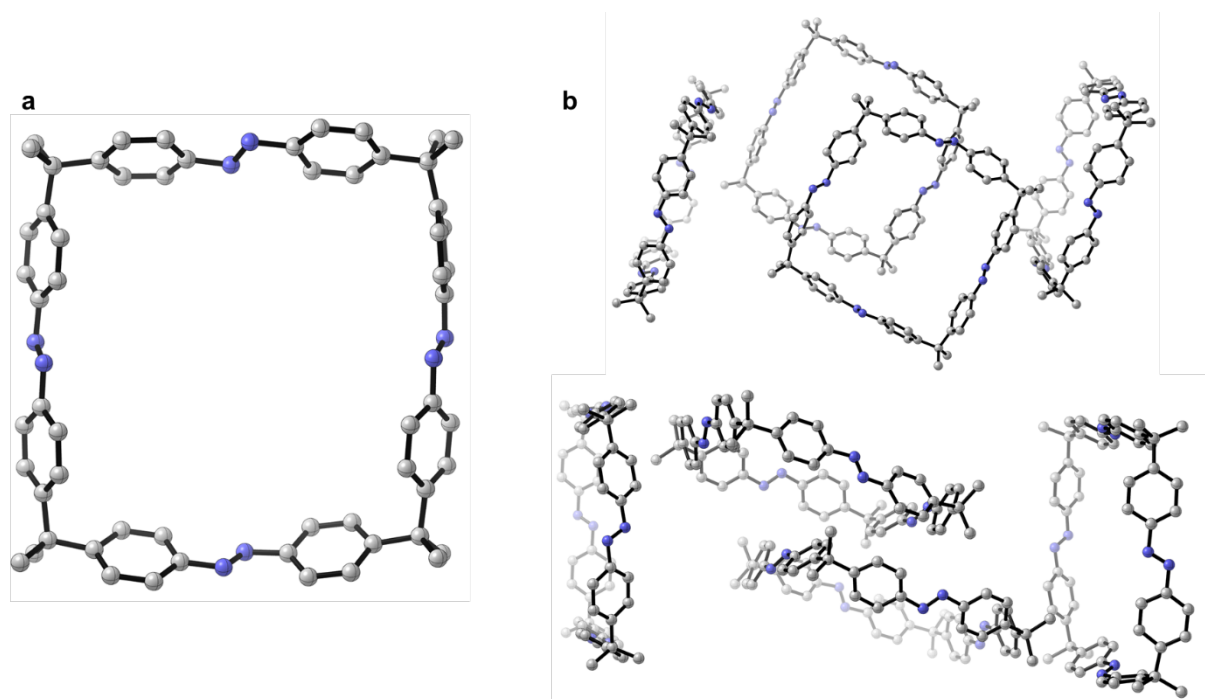

**Figure S14a:** Single crystal structure of tetraazo macrocycle **3**. **b:** Crystal packing of tetraazo macrocycle **3** (grey: carbon, blue: nitrogen; hydrogens omitted).

The unit cell of Tetraazo macrocycle **3** was determined using 9769 reflections and the structure was solved in the monoclinic space group  $P2_1/n$ . The asymmetric unit contains one molecule of Tetraazo macrocycle **3**, two disordered  $\text{CH}_2\text{Cl}_2$  molecules and other, heavily disordered solvent molecules. One of the four diphenyl-azo parts of the molecule was found to be disordered over two positions. The disorder was modeled with the help of similarity restraints (with s.u. set to 50% of the standard value) on anisotropic displacement parameters, advanced rigid bond restraints and same distance restraints on 1,2 and 1,3 distances. The anisotropic displacement parameters of some of the atoms in the disordered part were set to the same values. The disorder ratio was allowed to refine freely and converged to 0.612(13). Both disordered  $\text{CH}_2\text{Cl}_2$  molecules were modeled over two positions with the restraints mentioned before. Their disorder ratios were refined and converged to 0.911(3) and 0.658(17). It was not possible to find a reasonable disorder model for the other, heavily disordered solvent molecules. SQUEEZE was used to include a model for these solvent molecules. The obtained model was added as .fab-file to the refinement using SHELXL. SQUEEZE found four independent voids with disordered solvent, located at 0.10 0.09 0.16, -0.10 0.91 0.84, 0.40 0.59 0.34 and 0.60 0.41 0.66 with a combined volume of  $332 \text{ \AA}^3$ . The equivalent of 72 electrons were identified in the void.

Crystal data and structure refinement for Tetraazo macrocycle **3** .

|                                          |                                                                |                    |
|------------------------------------------|----------------------------------------------------------------|--------------------|
| CCDC No                                  | 1902883                                                        |                    |
| Empirical formula                        | C <sub>62</sub> H <sub>60</sub> Cl <sub>4</sub> N <sub>8</sub> |                    |
| Formula weight                           | 1058.98                                                        |                    |
| Temperature                              | 100(2) K                                                       |                    |
| Wavelength                               | 0.71073 Å                                                      |                    |
| Crystal system                           | Monoclinic                                                     |                    |
| Space group                              | <i>P</i> 2 <sub>1</sub> / <i>n</i>                             |                    |
| Unit cell dimensions                     | a = 16.6359(7) Å                                               | α = 90°.           |
|                                          | b = 20.2232(9) Å                                               | β = 100.2158(13)°. |
|                                          | c = 17.4545(8) Å                                               | γ = 90°.           |
| Volume                                   | 5779.1(4) Å <sup>3</sup>                                       |                    |
| Z                                        | 4                                                              |                    |
| Density (calculated)                     | 1.217 Mg/m <sup>3</sup>                                        |                    |
| Absorption coefficient                   | 0.251 mm <sup>-1</sup>                                         |                    |
| F(000)                                   | 2224                                                           |                    |
| Crystal size                             | 0.169 x 0.166 x 0.126 mm <sup>3</sup>                          |                    |
| Theta range for data collection          | 2.367 to 26.372°.                                              |                    |
| Index ranges                             | -20 ≤ h ≤ 20, -25 ≤ k ≤ 25, -21 ≤ l ≤ 21                       |                    |
| Reflections collected                    | 181053                                                         |                    |
| Independent reflections                  | 11826 [R(int) = 0.0749]                                        |                    |
| Completeness to theta = 25.242°          | 99.9 %                                                         |                    |
| Absorption correction                    | Semi-empirical from equivalents                                |                    |
| Refinement method                        | Full-matrix least-squares on <i>F</i> <sup>2</sup>             |                    |
| Data / restraints / parameters           | 11826 / 1918 / 822                                             |                    |
| Goodness-of-fit on <i>F</i> <sup>2</sup> | 1.038                                                          |                    |
| Final R indices [I > 2σ(I)]              | R1 = 0.0675, wR2 = 0.1604                                      |                    |
| R indices (all data)                     | R1 = 0.0941, wR2 = 0.1755                                      |                    |
| Largest diff. peak and hole              | 0.686 and -0.543 e.Å <sup>-3</sup>                             |                    |

Atomic coordinates ( $\times 10^4$ ) and equivalent isotropic displacement parameters ( $\text{\AA}^2 \times 10^3$ )  
for Tetraazo macrocycle **3**.  $U(\text{eq})$  is defined as one third of the trace of the orthogonalized  $U^{ij}$  tensor.

|       | x        | y       | z       | U(eq) |
|-------|----------|---------|---------|-------|
| N(1)  | 9101(1)  | 4504(1) | 4292(1) | 23(1) |
| N(2)  | 8914(1)  | 5106(1) | 4199(1) | 26(1) |
| N(3)  | 4298(1)  | 6605(1) | 5416(2) | 38(1) |
| N(4)  | 4014(1)  | 7144(1) | 5144(1) | 30(1) |
| N(5)  | 1025(9)  | 5172(4) | 970(6)  | 29(1) |
| N(6)  | 1630(4)  | 5309(3) | 657(4)  | 29(1) |
| N(5A) | 1073(15) | 5114(7) | 1046(9) | 29(1) |
| N(6A) | 1423(6)  | 5332(6) | 526(6)  | 29(1) |
| N(7)  | 5813(1)  | 3379(1) | -582(1) | 24(1) |
| N(8)  | 6007(1)  | 3045(1) | 30(1)   | 23(1) |
| C(1)  | 6862(1)  | 3032(1) | 329(1)  | 21(1) |
| C(2)  | 7085(2)  | 2780(2) | 1076(2) | 29(1) |
| C(3)  | 7893(2)  | 2778(2) | 1435(2) | 29(1) |
| C(4)  | 8506(1)  | 3024(1) | 1057(1) | 21(1) |
| C(5)  | 8275(2)  | 3248(1) | 298(1)  | 22(1) |
| C(6)  | 7464(2)  | 3255(1) | -66(1)  | 22(1) |
| C(7)  | 9385(1)  | 3049(1) | 1507(1) | 21(1) |
| C(8)  | 9963(1)  | 3410(1) | 1051(1) | 26(1) |
| C(9)  | 9697(2)  | 2337(1) | 1649(2) | 26(1) |
| C(10) | 9359(1)  | 3433(1) | 2262(1) | 20(1) |
| C(11) | 9571(2)  | 3168(1) | 3004(1) | 23(1) |
| C(12) | 9494(2)  | 3535(1) | 3660(1) | 24(1) |
| C(13) | 9213(1)  | 4178(1) | 3592(1) | 22(1) |
| C(14) | 9001(2)  | 4451(1) | 2850(2) | 30(1) |
| C(15) | 9068(2)  | 4080(1) | 2205(2) | 29(1) |
| C(21) | 8713(2)  | 5420(1) | 4873(1) | 25(1) |
| C(22) | 8879(2)  | 5169(1) | 5623(2) | 25(1) |
| C(23) | 8580(2)  | 5486(1) | 6218(1) | 25(1) |
| C(24) | 8108(1)  | 6055(1) | 6080(1) | 23(1) |
| C(25) | 7988(2)  | 6320(2) | 5332(2) | 30(1) |
| C(26) | 8289(2)  | 6013(1) | 4737(2) | 31(1) |
| C(27) | 7729(2)  | 6405(1) | 6712(1) | 26(1) |
| C(28) | 8175(2)  | 7062(1) | 6905(2) | 30(1) |



|        |          |          |           |       |
|--------|----------|----------|-----------|-------|
| C(29)  | 7825(2)  | 5998(2)  | 7467(2)   | 32(1) |
| C(30)  | 6815(2)  | 6499(1)  | 6387(2)   | 27(1) |
| C(31)  | 6336(2)  | 5938(2)  | 6182(2)   | 47(1) |
| C(32)  | 5514(2)  | 5993(2)  | 5871(2)   | 50(1) |
| C(33)  | 5158(2)  | 6612(2)  | 5752(2)   | 36(1) |
| C(34)  | 5618(2)  | 7171(2)  | 5933(2)   | 31(1) |
| C(35)  | 6446(2)  | 7107(2)  | 6250(2)   | 30(1) |
| C(41)  | 3163(2)  | 7100(1)  | 4805(2)   | 26(1) |
| C(42)  | 2849(2)  | 7612(1)  | 4322(2)   | 28(1) |
| C(43)  | 2046(2)  | 7586(1)  | 3928(1)   | 25(1) |
| C(44)  | 1544(1)  | 7050(1)  | 4007(1)   | 21(1) |
| C(45)  | 1858(2)  | 6558(1)  | 4536(2)   | 31(1) |
| C(46)  | 2656(2)  | 6575(2)  | 4926(2)   | 34(1) |
| C(47)  | 703(2)   | 6957(1)  | 3493(1)   | 23(1) |
| C(48)  | 378(2)   | 7608(1)  | 3086(2)   | 31(1) |
| C(49)  | 72(2)    | 6714(1)  | 3975(2)   | 26(1) |
| C(50)  | 765(7)   | 6438(7)  | 2858(8)   | 22(2) |
| C(51)  | 284(4)   | 5881(3)  | 2692(3)   | 20(1) |
| C(52)  | 381(4)   | 5462(3)  | 2087(4)   | 22(1) |
| C(53)  | 933(6)   | 5599(7)  | 1614(8)   | 26(1) |
| C(54)  | 1432(6)  | 6156(4)  | 1777(4)   | 41(2) |
| C(55)  | 1341(6)  | 6561(4)  | 2387(4)   | 40(2) |
| C(61)  | 1701(8)  | 4879(7)  | 9(8)      | 26(2) |
| C(62)  | 1295(6)  | 4283(6)  | -132(6)   | 26(2) |
| C(63)  | 1486(8)  | 3858(7)  | -703(7)   | 22(2) |
| C(64)  | 2060(20) | 4029(13) | -1160(20) | 20(2) |
| C(65)  | 2414(9)  | 4660(6)  | -1042(8)  | 23(2) |
| C(66)  | 2237(9)  | 5080(6)  | -471(8)   | 28(2) |
| C(50A) | 890(10)  | 6487(11) | 2831(13)  | 24(3) |
| C(51A) | 267(7)   | 6076(7)  | 2473(8)   | 40(3) |
| C(52A) | 354(7)   | 5648(7)  | 1878(8)   | 42(3) |
| C(53A) | 1088(10) | 5625(11) | 1627(13)  | 26(1) |
| C(54A) | 1741(7)  | 6000(5)  | 2000(6)   | 35(2) |
| C(55A) | 1651(7)  | 6408(6)  | 2614(7)   | 36(2) |
| C(61A) | 1556(12) | 4841(11) | -39(12)   | 26(2) |
| C(62A) | 1134(11) | 4277(10) | -259(11)  | 26(2) |
| C(63A) | 1358(12) | 3871(11) | -831(12)  | 23(3) |
| C(64A) | 2040(30) | 4010(20) | -1150(40) | 20(3) |
| C(65A) | 2480(15) | 4590(9)  | -920(12)  | 24(3) |

|        |          |          |          |        |
|--------|----------|----------|----------|--------|
| C(66A) | 2253(14) | 4990(9)  | -358(12) | 29(3)  |
| C(67)  | 2356(1)  | 3561(1)  | -1740(1) | 20(1)  |
| C(68)  | 2157(2)  | 3865(1)  | -2562(1) | 25(1)  |
| C(69)  | 1955(2)  | 2875(1)  | -1768(2) | 25(1)  |
| C(70)  | 3280(1)  | 3490(1)  | -1466(1) | 19(1)  |
| C(71)  | 3859(2)  | 3723(1)  | -1881(1) | 22(1)  |
| C(72)  | 4689(2)  | 3683(1)  | -1578(1) | 24(1)  |
| C(73)  | 4953(1)  | 3399(1)  | -853(1)  | 22(1)  |
| C(74)  | 4376(2)  | 3167(1)  | -424(1)  | 23(1)  |
| C(75)  | 3557(1)  | 3211(1)  | -731(1)  | 22(1)  |
| Cl(1S) | 6917(1)  | 4109(1)  | 2631(1)  | 114(1) |
| Cl(2S) | 6466(2)  | 5053(1)  | 3742(1)  | 110(1) |
| C(1S)  | 6138(3)  | 4408(3)  | 3084(3)  | 75(1)  |
| Cl(1T) | 6256(19) | 4027(15) | 2086(13) | 176(9) |
| Cl(2T) | 6828(7)  | 4753(8)  | 3446(10) | 77(4)  |
| C(1T)  | 6740(30) | 3950(13) | 3058(16) | 75(1)  |
| Cl(3S) | 6180(3)  | 5427(2)  | 8397(3)  | 92(1)  |
| Cl(4S) | 4716(1)  | 5509(1)  | 9052(1)  | 35(1)  |
| C(2S)  | 5740(3)  | 5258(5)  | 9221(4)  | 40(2)  |
| Cl(3T) | 6355(7)  | 5554(6)  | 8664(10) | 122(4) |
| Cl(4T) | 4764(8)  | 5478(6)  | 9055(7)  | 175(7) |
| C(2T)  | 5792(11) | 5299(17) | 9365(14) | 108(6) |

Bond lengths [Å] and angles [°] for Tetraazo macrocycle **3** .

|              |           |            |          |
|--------------|-----------|------------|----------|
| N(1)-N(2)    | 1.259(3)  | N(7)-C(73) | 1.425(3) |
| N(1)-C(13)   | 1.429(3)  | N(8)-C(1)  | 1.426(3) |
| N(2)-C(21)   | 1.428(3)  | C(1)-C(2)  | 1.388(3) |
| N(3)-N(4)    | 1.247(3)  | C(1)-C(6)  | 1.389(3) |
| N(3)-C(33)   | 1.446(4)  | C(2)-C(3)  | 1.379(4) |
| N(4)-C(41)   | 1.438(3)  | C(2)-H(2)  | 0.9500   |
| N(5)-N(6)    | 1.259(9)  | C(3)-C(4)  | 1.399(3) |
| N(5)-C(53)   | 1.446(7)  | C(3)-H(3)  | 0.9500   |
| N(6)-C(61)   | 1.448(7)  | C(4)-C(5)  | 1.389(3) |
| N(5A)-N(6A)  | 1.241(13) | C(4)-C(7)  | 1.534(3) |
| N(5A)-C(53A) | 1.446(11) | C(5)-C(6)  | 1.386(3) |
| N(6A)-C(61A) | 1.445(11) | C(5)-H(5)  | 0.9500   |
| N(7)-N(8)    | 1.256(3)  | C(6)-H(6)  | 0.9500   |

|              |          |              |           |
|--------------|----------|--------------|-----------|
| C(7)-C(9)    | 1.536(4) | C(30)-C(35)  | 1.377(4)  |
| C(7)-C(10)   | 1.536(3) | C(30)-C(31)  | 1.394(4)  |
| C(7)-C(8)    | 1.538(3) | C(31)-C(32)  | 1.384(4)  |
| C(8)-H(8A)   | 0.9800   | C(31)-H(31)  | 0.9500    |
| C(8)-H(8B)   | 0.9800   | C(32)-C(33)  | 1.385(5)  |
| C(8)-H(8C)   | 0.9800   | C(32)-H(32)  | 0.9500    |
| C(9)-H(9A)   | 0.9800   | C(33)-C(34)  | 1.371(4)  |
| C(9)-H(9B)   | 0.9800   | C(34)-C(35)  | 1.397(4)  |
| C(9)-H(9C)   | 0.9800   | C(34)-H(34)  | 0.9500    |
| C(10)-C(11)  | 1.389(3) | C(35)-H(35)  | 0.9500    |
| C(10)-C(15)  | 1.393(4) | C(41)-C(42)  | 1.379(4)  |
| C(11)-C(12)  | 1.389(4) | C(41)-C(46)  | 1.395(4)  |
| C(11)-H(11)  | 0.9500   | C(42)-C(43)  | 1.390(4)  |
| C(12)-C(13)  | 1.380(4) | C(42)-H(42)  | 0.9500    |
| C(12)-H(12)  | 0.9500   | C(43)-C(44)  | 1.391(3)  |
| C(13)-C(14)  | 1.394(4) | C(43)-H(43)  | 0.9500    |
| C(14)-C(15)  | 1.374(4) | C(44)-C(45)  | 1.394(4)  |
| C(14)-H(14)  | 0.9500   | C(44)-C(47)  | 1.534(3)  |
| C(15)-H(15)  | 0.9500   | C(45)-C(46)  | 1.381(4)  |
| C(21)-C(22)  | 1.384(4) | C(45)-H(45)  | 0.9500    |
| C(21)-C(26)  | 1.391(4) | C(46)-H(46)  | 0.9500    |
| C(22)-C(23)  | 1.386(4) | C(47)-C(49)  | 1.539(4)  |
| C(22)-H(22)  | 0.9500   | C(47)-C(50)  | 1.543(7)  |
| C(23)-C(24)  | 1.391(4) | C(47)-C(48)  | 1.546(4)  |
| C(23)-H(23)  | 0.9500   | C(47)-C(50A) | 1.569(10) |
| C(24)-C(25)  | 1.392(4) | C(48)-H(48A) | 0.9800    |
| C(24)-C(27)  | 1.537(3) | C(48)-H(48B) | 0.9800    |
| C(25)-C(26)  | 1.378(4) | C(48)-H(48C) | 0.9800    |
| C(25)-H(25)  | 0.9500   | C(49)-H(49A) | 0.9800    |
| C(26)-H(26)  | 0.9500   | C(49)-H(49B) | 0.9800    |
| C(27)-C(28)  | 1.530(4) | C(49)-H(49C) | 0.9800    |
| C(27)-C(29)  | 1.537(4) | C(50)-C(51)  | 1.382(8)  |
| C(27)-C(30)  | 1.538(3) | C(50)-C(55)  | 1.391(9)  |
| C(28)-H(28A) | 0.9800   | C(51)-C(52)  | 1.386(7)  |
| C(28)-H(28B) | 0.9800   | C(51)-H(51)  | 0.9500    |
| C(28)-H(28C) | 0.9800   | C(52)-C(53)  | 1.367(8)  |
| C(29)-H(29A) | 0.9800   | C(52)-H(52)  | 0.9500    |
| C(29)-H(29B) | 0.9800   | C(53)-C(54)  | 1.399(9)  |
| C(29)-H(29C) | 0.9800   | C(54)-C(55)  | 1.373(7)  |

|               |           |                    |           |
|---------------|-----------|--------------------|-----------|
| C(54)-H(54)   | 0.9500    | C(68)-H(68C)       | 0.9800    |
| C(55)-H(55)   | 0.9500    | C(69)-H(69A)       | 0.9800    |
| C(61)-C(62)   | 1.382(8)  | C(69)-H(69B)       | 0.9800    |
| C(61)-C(66)   | 1.389(9)  | C(69)-H(69C)       | 0.9800    |
| C(62)-C(63)   | 1.395(8)  | C(70)-C(71)        | 1.387(3)  |
| C(62)-H(62)   | 0.9500    | C(70)-C(75)        | 1.401(3)  |
| C(63)-C(64)   | 1.391(10) | C(71)-C(72)        | 1.391(3)  |
| C(63)-H(63)   | 0.9500    | C(71)-H(71)        | 0.9500    |
| C(64)-C(65)   | 1.402(10) | C(72)-C(73)        | 1.388(3)  |
| C(64)-C(67)   | 1.535(8)  | C(72)-H(72)        | 0.9500    |
| C(65)-C(66)   | 1.380(8)  | C(73)-C(74)        | 1.399(3)  |
| C(65)-H(65)   | 0.9500    | C(74)-C(75)        | 1.375(3)  |
| C(66)-H(66)   | 0.9500    | C(74)-H(74)        | 0.9500    |
| C(50A)-C(51A) | 1.387(11) | C(75)-H(75)        | 0.9500    |
| C(50A)-C(55A) | 1.395(12) | Cl(1S)-C(1S)       | 1.742(5)  |
| C(51A)-C(52A) | 1.379(10) | Cl(2S)-C(1S)       | 1.760(5)  |
| C(51A)-H(51A) | 0.9500    | C(1S)-H(1SA)       | 0.9900    |
| C(52A)-C(53A) | 1.370(12) | C(1S)-H(1SB)       | 0.9900    |
| C(52A)-H(52A) | 0.9500    | Cl(1T)-C(1T)       | 1.749(15) |
| C(53A)-C(54A) | 1.388(11) | Cl(2T)-C(1T)       | 1.755(16) |
| C(54A)-C(55A) | 1.382(10) | C(1T)-H(1TA)       | 0.9900    |
| C(54A)-H(54A) | 0.9500    | C(1T)-H(1TB)       | 0.9900    |
| C(55A)-H(55A) | 0.9500    | Cl(3S)-C(2S)       | 1.760(5)  |
| C(61A)-C(62A) | 1.358(11) | Cl(4S)-C(2S)       | 1.752(6)  |
| C(61A)-C(66A) | 1.404(12) | C(2S)-H(2SA)       | 0.9900    |
| C(62A)-C(63A) | 1.394(11) | C(2S)-H(2SB)       | 0.9900    |
| C(62A)-H(62A) | 0.9500    | Cl(3T)-C(2T)       | 1.746(14) |
| C(63A)-C(64A) | 1.382(12) | Cl(4T)-C(2T)       | 1.737(14) |
| C(63A)-H(63A) | 0.9500    | C(2T)-H(2TA)       | 0.9900    |
| C(64A)-C(65A) | 1.400(13) | C(2T)-H(2TB)       | 0.9900    |
| C(64A)-C(67)  | 1.533(11) |                    |           |
| C(65A)-C(66A) | 1.376(11) | N(2)-N(1)-C(13)    | 113.8(2)  |
| C(65A)-H(65A) | 0.9500    | N(1)-N(2)-C(21)    | 114.3(2)  |
| C(66A)-H(66A) | 0.9500    | N(4)-N(3)-C(33)    | 115.2(2)  |
| C(67)-C(70)   | 1.533(3)  | N(3)-N(4)-C(41)    | 112.4(2)  |
| C(67)-C(69)   | 1.536(3)  | N(6)-N(5)-C(53)    | 114.1(8)  |
| C(67)-C(68)   | 1.542(3)  | N(5)-N(6)-C(61)    | 112.9(7)  |
| C(68)-H(68A)  | 0.9800    | N(6A)-N(5A)-C(53A) | 107.9(13) |
| C(68)-H(68B)  | 0.9800    | N(5A)-N(6A)-C(61A) | 113.9(13) |

|                   |            |                   |          |
|-------------------|------------|-------------------|----------|
| N(8)-N(7)-C(73)   | 113.0(2)   | C(11)-C(10)-C(7)  | 124.3(2) |
| N(7)-N(8)-C(1)    | 114.2(2)   | C(15)-C(10)-C(7)  | 118.4(2) |
| C(2)-C(1)-C(6)    | 119.4(2)   | C(12)-C(11)-C(10) | 121.2(2) |
| C(2)-C(1)-N(8)    | 115.7(2)   | C(12)-C(11)-H(11) | 119.4    |
| C(6)-C(1)-N(8)    | 124.9(2)   | C(10)-C(11)-H(11) | 119.4    |
| C(3)-C(2)-C(1)    | 120.2(2)   | C(13)-C(12)-C(11) | 120.8(2) |
| C(3)-C(2)-H(2)    | 119.9      | C(13)-C(12)-H(12) | 119.6    |
| C(1)-C(2)-H(2)    | 119.9      | C(11)-C(12)-H(12) | 119.6    |
| C(2)-C(3)-C(4)    | 121.2(2)   | C(12)-C(13)-C(14) | 118.6(2) |
| C(2)-C(3)-H(3)    | 119.4      | C(12)-C(13)-N(1)  | 117.1(2) |
| C(4)-C(3)-H(3)    | 119.4      | C(14)-C(13)-N(1)  | 124.1(2) |
| C(5)-C(4)-C(3)    | 117.7(2)   | C(15)-C(14)-C(13) | 120.1(3) |
| C(5)-C(4)-C(7)    | 123.7(2)   | C(15)-C(14)-H(14) | 120.0    |
| C(3)-C(4)-C(7)    | 118.5(2)   | C(13)-C(14)-H(14) | 120.0    |
| C(6)-C(5)-C(4)    | 121.5(2)   | C(14)-C(15)-C(10) | 122.1(2) |
| C(6)-C(5)-H(5)    | 119.3      | C(14)-C(15)-H(15) | 118.9    |
| C(4)-C(5)-H(5)    | 119.3      | C(10)-C(15)-H(15) | 118.9    |
| C(5)-C(6)-C(1)    | 119.9(2)   | C(22)-C(21)-C(26) | 119.2(2) |
| C(5)-C(6)-H(6)    | 120.1      | C(22)-C(21)-N(2)  | 125.4(2) |
| C(1)-C(6)-H(6)    | 120.1      | C(26)-C(21)-N(2)  | 115.4(2) |
| C(4)-C(7)-C(9)    | 108.4(2)   | C(21)-C(22)-C(23) | 120.1(2) |
| C(4)-C(7)-C(10)   | 106.69(18) | C(21)-C(22)-H(22) | 120.0    |
| C(9)-C(7)-C(10)   | 113.4(2)   | C(23)-C(22)-H(22) | 120.0    |
| C(4)-C(7)-C(8)    | 112.2(2)   | C(22)-C(23)-C(24) | 121.3(2) |
| C(9)-C(7)-C(8)    | 107.6(2)   | C(22)-C(23)-H(23) | 119.3    |
| C(10)-C(7)-C(8)   | 108.7(2)   | C(24)-C(23)-H(23) | 119.3    |
| C(7)-C(8)-H(8A)   | 109.5      | C(23)-C(24)-C(25) | 117.6(2) |
| C(7)-C(8)-H(8B)   | 109.5      | C(23)-C(24)-C(27) | 123.2(2) |
| H(8A)-C(8)-H(8B)  | 109.5      | C(25)-C(24)-C(27) | 119.2(2) |
| C(7)-C(8)-H(8C)   | 109.5      | C(26)-C(25)-C(24) | 121.5(3) |
| H(8A)-C(8)-H(8C)  | 109.5      | C(26)-C(25)-H(25) | 119.2    |
| H(8B)-C(8)-H(8C)  | 109.5      | C(24)-C(25)-H(25) | 119.2    |
| C(7)-C(9)-H(9A)   | 109.5      | C(25)-C(26)-C(21) | 120.1(2) |
| C(7)-C(9)-H(9B)   | 109.5      | C(25)-C(26)-H(26) | 119.9    |
| H(9A)-C(9)-H(9B)  | 109.5      | C(21)-C(26)-H(26) | 120.0    |
| C(7)-C(9)-H(9C)   | 109.5      | C(28)-C(27)-C(29) | 107.7(2) |
| H(9A)-C(9)-H(9C)  | 109.5      | C(28)-C(27)-C(24) | 108.2(2) |
| H(9B)-C(9)-H(9C)  | 109.5      | C(29)-C(27)-C(24) | 112.1(2) |
| C(11)-C(10)-C(15) | 117.2(2)   | C(28)-C(27)-C(30) | 112.6(2) |

|                     |          |                     |            |
|---------------------|----------|---------------------|------------|
| C(29)-C(27)-C(30)   | 109.2(2) | C(42)-C(43)-H(43)   | 119.3      |
| C(24)-C(27)-C(30)   | 107.2(2) | C(44)-C(43)-H(43)   | 119.3      |
| C(27)-C(28)-H(28A)  | 109.5    | C(43)-C(44)-C(45)   | 117.4(2)   |
| C(27)-C(28)-H(28B)  | 109.5    | C(43)-C(44)-C(47)   | 122.6(2)   |
| H(28A)-C(28)-H(28B) | 109.5    | C(45)-C(44)-C(47)   | 119.7(2)   |
| C(27)-C(28)-H(28C)  | 109.5    | C(46)-C(45)-C(44)   | 121.6(2)   |
| H(28A)-C(28)-H(28C) | 109.5    | C(46)-C(45)-H(45)   | 119.2      |
| H(28B)-C(28)-H(28C) | 109.5    | C(44)-C(45)-H(45)   | 119.2      |
| C(27)-C(29)-H(29A)  | 109.5    | C(45)-C(46)-C(41)   | 119.9(3)   |
| C(27)-C(29)-H(29B)  | 109.5    | C(45)-C(46)-H(46)   | 120.1      |
| H(29A)-C(29)-H(29B) | 109.5    | C(41)-C(46)-H(46)   | 120.1      |
| C(27)-C(29)-H(29C)  | 109.5    | C(44)-C(47)-C(49)   | 111.00(19) |
| H(29A)-C(29)-H(29C) | 109.5    | C(44)-C(47)-C(50)   | 109.5(6)   |
| H(29B)-C(29)-H(29C) | 109.5    | C(49)-C(47)-C(50)   | 108.3(4)   |
| C(35)-C(30)-C(31)   | 117.7(2) | C(44)-C(47)-C(48)   | 111.9(2)   |
| C(35)-C(30)-C(27)   | 123.7(2) | C(49)-C(47)-C(48)   | 107.9(2)   |
| C(31)-C(30)-C(27)   | 118.4(3) | C(50)-C(47)-C(48)   | 108.2(8)   |
| C(32)-C(31)-C(30)   | 121.0(3) | C(44)-C(47)-C(50A)  | 103.1(8)   |
| C(32)-C(31)-H(31)   | 119.5    | C(49)-C(47)-C(50A)  | 116.9(7)   |
| C(30)-C(31)-H(31)   | 119.5    | C(48)-C(47)-C(50A)  | 106.1(12)  |
| C(31)-C(32)-C(33)   | 119.9(3) | C(47)-C(48)-H(48A)  | 109.5      |
| C(31)-C(32)-H(32)   | 120.0    | C(47)-C(48)-H(48B)  | 109.5      |
| C(33)-C(32)-H(32)   | 120.0    | H(48A)-C(48)-H(48B) | 109.5      |
| C(34)-C(33)-C(32)   | 120.3(3) | C(47)-C(48)-H(48C)  | 109.5      |
| C(34)-C(33)-N(3)    | 124.9(3) | H(48A)-C(48)-H(48C) | 109.5      |
| C(32)-C(33)-N(3)    | 114.7(3) | H(48B)-C(48)-H(48C) | 109.5      |
| C(33)-C(34)-C(35)   | 119.0(3) | C(47)-C(49)-H(49A)  | 109.5      |
| C(33)-C(34)-H(34)   | 120.5    | C(47)-C(49)-H(49B)  | 109.5      |
| C(35)-C(34)-H(34)   | 120.5    | H(49A)-C(49)-H(49B) | 109.5      |
| C(30)-C(35)-C(34)   | 122.0(3) | C(47)-C(49)-H(49C)  | 109.5      |
| C(30)-C(35)-H(35)   | 119.0    | H(49A)-C(49)-H(49C) | 109.5      |
| C(34)-C(35)-H(35)   | 119.0    | H(49B)-C(49)-H(49C) | 109.5      |
| C(42)-C(41)-C(46)   | 119.4(2) | C(51)-C(50)-C(55)   | 117.1(6)   |
| C(42)-C(41)-N(4)    | 116.4(2) | C(51)-C(50)-C(47)   | 126.5(6)   |
| C(46)-C(41)-N(4)    | 124.2(2) | C(55)-C(50)-C(47)   | 116.3(7)   |
| C(41)-C(42)-C(43)   | 120.1(2) | C(50)-C(51)-C(52)   | 121.1(5)   |
| C(41)-C(42)-H(42)   | 120.0    | C(50)-C(51)-H(51)   | 119.5      |
| C(43)-C(42)-H(42)   | 120.0    | C(52)-C(51)-H(51)   | 119.5      |
| C(42)-C(43)-C(44)   | 121.4(2) | C(53)-C(52)-C(51)   | 121.3(6)   |

|                      |           |                      |            |
|----------------------|-----------|----------------------|------------|
| C(53)-C(52)-H(52)    | 119.4     | C(52A)-C(53A)-N(5A)  | 110.0(11)  |
| C(51)-C(52)-H(52)    | 119.4     | C(54A)-C(53A)-N(5A)  | 129.4(13)  |
| C(52)-C(53)-C(54)    | 118.5(6)  | C(55A)-C(54A)-C(53A) | 120.5(9)   |
| C(52)-C(53)-N(5)     | 121.6(7)  | C(55A)-C(54A)-H(54A) | 119.8      |
| C(54)-C(53)-N(5)     | 119.9(7)  | C(53A)-C(54A)-H(54A) | 119.8      |
| C(55)-C(54)-C(53)    | 119.7(6)  | C(54A)-C(55A)-C(50A) | 120.5(9)   |
| C(55)-C(54)-H(54)    | 120.2     | C(54A)-C(55A)-H(55A) | 119.8      |
| C(53)-C(54)-H(54)    | 120.2     | C(50A)-C(55A)-H(55A) | 119.8      |
| C(54)-C(55)-C(50)    | 122.3(5)  | C(62A)-C(61A)-C(66A) | 119.4(10)  |
| C(54)-C(55)-H(55)    | 118.8     | C(62A)-C(61A)-N(6A)  | 129.4(12)  |
| C(50)-C(55)-H(55)    | 118.8     | C(66A)-C(61A)-N(6A)  | 111.1(11)  |
| C(62)-C(61)-C(66)    | 119.6(7)  | C(61A)-C(62A)-C(63A) | 120.4(13)  |
| C(62)-C(61)-N(6)     | 124.0(8)  | C(61A)-C(62A)-H(62A) | 119.8      |
| C(66)-C(61)-N(6)     | 116.4(7)  | C(63A)-C(62A)-H(62A) | 119.8      |
| C(61)-C(62)-C(63)    | 120.0(8)  | C(64A)-C(63A)-C(62A) | 120.9(13)  |
| C(61)-C(62)-H(62)    | 120.0     | C(64A)-C(63A)-H(63A) | 119.6      |
| C(63)-C(62)-H(62)    | 120.0     | C(62A)-C(63A)-H(63A) | 119.6      |
| C(64)-C(63)-C(62)    | 121.3(8)  | C(63A)-C(64A)-C(65A) | 118.5(11)  |
| C(64)-C(63)-H(63)    | 119.4     | C(63A)-C(64A)-C(67)  | 123.6(13)  |
| C(62)-C(63)-H(63)    | 119.4     | C(65A)-C(64A)-C(67)  | 117.9(13)  |
| C(63)-C(64)-C(65)    | 117.3(7)  | C(66A)-C(65A)-C(64A) | 120.2(13)  |
| C(63)-C(64)-C(67)    | 123.9(10) | C(66A)-C(65A)-H(65A) | 119.9      |
| C(65)-C(64)-C(67)    | 118.8(9)  | C(64A)-C(65A)-H(65A) | 119.9      |
| C(66)-C(65)-C(64)    | 121.7(9)  | C(65A)-C(66A)-C(61A) | 120.4(13)  |
| C(66)-C(65)-H(65)    | 119.1     | C(65A)-C(66A)-H(66A) | 119.8      |
| C(64)-C(65)-H(65)    | 119.1     | C(61A)-C(66A)-H(66A) | 119.8      |
| C(65)-C(66)-C(61)    | 119.8(8)  | C(70)-C(67)-C(64A)   | 107(3)     |
| C(65)-C(66)-H(66)    | 120.1     | C(70)-C(67)-C(64)    | 105.7(16)  |
| C(61)-C(66)-H(66)    | 120.1     | C(70)-C(67)-C(69)    | 109.3(2)   |
| C(51A)-C(50A)-C(55A) | 116.8(9)  | C(64A)-C(67)-C(69)   | 111.1(10)  |
| C(51A)-C(50A)-C(47)  | 117.7(9)  | C(64)-C(67)-C(69)    | 113.0(6)   |
| C(55A)-C(50A)-C(47)  | 125.3(9)  | C(70)-C(67)-C(68)    | 111.53(19) |
| C(52A)-C(51A)-C(50A) | 123.1(10) | C(64A)-C(67)-C(68)   | 110(3)     |
| C(52A)-C(51A)-H(51A) | 118.5     | C(64)-C(67)-C(68)    | 109.4(19)  |
| C(50A)-C(51A)-H(51A) | 118.5     | C(69)-C(67)-C(68)    | 108.1(2)   |
| C(53A)-C(52A)-C(51A) | 118.7(10) | C(67)-C(68)-H(68A)   | 109.5      |
| C(53A)-C(52A)-H(52A) | 120.6     | C(67)-C(68)-H(68B)   | 109.5      |
| C(51A)-C(52A)-H(52A) | 120.6     | H(68A)-C(68)-H(68B)  | 109.5      |
| C(52A)-C(53A)-C(54A) | 120.0(10) | C(67)-C(68)-H(68C)   | 109.5      |

|                     |          |                     |           |
|---------------------|----------|---------------------|-----------|
| H(68A)-C(68)-H(68C) | 109.5    | C(70)-C(75)-H(75)   | 119.2     |
| H(68B)-C(68)-H(68C) | 109.5    | Cl(1S)-C(1S)-Cl(2S) | 112.6(3)  |
| C(67)-C(69)-H(69A)  | 109.5    | Cl(1S)-C(1S)-H(1SA) | 109.1     |
| C(67)-C(69)-H(69B)  | 109.5    | Cl(2S)-C(1S)-H(1SA) | 109.1     |
| H(69A)-C(69)-H(69B) | 109.5    | Cl(1S)-C(1S)-H(1SB) | 109.1     |
| C(67)-C(69)-H(69C)  | 109.5    | Cl(2S)-C(1S)-H(1SB) | 109.1     |
| H(69A)-C(69)-H(69C) | 109.5    | H(1SA)-C(1S)-H(1SB) | 107.8     |
| H(69B)-C(69)-H(69C) | 109.5    | Cl(1T)-C(1T)-Cl(2T) | 106.6(16) |
| C(71)-C(70)-C(75)   | 117.9(2) | Cl(1T)-C(1T)-H(1TA) | 110.4     |
| C(71)-C(70)-C(67)   | 123.7(2) | Cl(2T)-C(1T)-H(1TA) | 110.4     |
| C(75)-C(70)-C(67)   | 118.2(2) | Cl(1T)-C(1T)-H(1TB) | 110.4     |
| C(70)-C(71)-C(72)   | 121.1(2) | Cl(2T)-C(1T)-H(1TB) | 110.4     |
| C(70)-C(71)-H(71)   | 119.5    | H(1TA)-C(1T)-H(1TB) | 108.6     |
| C(72)-C(71)-H(71)   | 119.5    | Cl(4S)-C(2S)-Cl(3S) | 109.8(4)  |
| C(73)-C(72)-C(71)   | 120.2(2) | Cl(4S)-C(2S)-H(2SA) | 109.7     |
| C(73)-C(72)-H(72)   | 119.9    | Cl(3S)-C(2S)-H(2SA) | 109.7     |
| C(71)-C(72)-H(72)   | 119.9    | Cl(4S)-C(2S)-H(2SB) | 109.7     |
| C(72)-C(73)-C(74)   | 119.3(2) | Cl(3S)-C(2S)-H(2SB) | 109.7     |
| C(72)-C(73)-N(7)    | 116.8(2) | H(2SA)-C(2S)-H(2SB) | 108.2     |
| C(74)-C(73)-N(7)    | 123.8(2) | Cl(4T)-C(2T)-Cl(3T) | 109.9(12) |
| C(75)-C(74)-C(73)   | 119.8(2) | Cl(4T)-C(2T)-H(2TA) | 109.7     |
| C(75)-C(74)-H(74)   | 120.1    | Cl(3T)-C(2T)-H(2TA) | 109.7     |
| C(73)-C(74)-H(74)   | 120.1    | Cl(4T)-C(2T)-H(2TB) | 109.7     |
| C(74)-C(75)-C(70)   | 121.7(2) | Cl(3T)-C(2T)-H(2TB) | 109.7     |
| C(74)-C(75)-H(75)   | 119.2    | H(2TA)-C(2T)-H(2TB) | 108.2     |



Anisotropic displacement parameters ( $\text{\AA}^2 \times 10^3$ ) for Tetraazo macrocycle **3**. The anisotropic displacement factor exponent takes the form:  $-2\pi^2 [ h^2 a^{*2}U^{11} + \dots + 2 h k a^* b^* U^{12} ]$

|       | U <sup>11</sup> | U <sup>22</sup> | U <sup>33</sup> | U <sup>23</sup> | U <sup>13</sup> | U <sup>12</sup> |
|-------|-----------------|-----------------|-----------------|-----------------|-----------------|-----------------|
| N(1)  | 19(1)           | 31(1)           | 20(1)           | -1(1)           | 6(1)            | -2(1)           |
| N(2)  | 26(1)           | 33(1)           | 22(1)           | -2(1)           | 8(1)            | 1(1)            |
| N(3)  | 23(1)           | 46(2)           | 44(2)           | 3(1)            | 4(1)            | -9(1)           |
| N(4)  | 24(1)           | 40(1)           | 26(1)           | 1(1)            | 7(1)            | -6(1)           |
| N(5)  | 35(2)           | 26(1)           | 24(2)           | 6(1)            | 4(2)            | 5(2)            |
| N(6)  | 35(2)           | 26(1)           | 24(2)           | 6(1)            | 4(2)            | 5(2)            |
| N(5A) | 35(2)           | 26(1)           | 24(2)           | 6(1)            | 4(2)            | 5(2)            |
| N(6A) | 35(2)           | 26(1)           | 24(2)           | 6(1)            | 4(2)            | 5(2)            |
| N(7)  | 19(1)           | 34(1)           | 17(1)           | 0(1)            | 0(1)            | 0(1)            |
| N(8)  | 19(1)           | 30(1)           | 20(1)           | 1(1)            | 0(1)            | -1(1)           |
| C(1)  | 17(1)           | 26(1)           | 19(1)           | -2(1)           | -1(1)           | -2(1)           |
| C(2)  | 18(1)           | 46(2)           | 22(1)           | 7(1)            | 4(1)            | -5(1)           |
| C(3)  | 20(1)           | 48(2)           | 18(1)           | 7(1)            | 2(1)            | -3(1)           |
| C(4)  | 18(1)           | 27(1)           | 18(1)           | -1(1)           | 3(1)            | 0(1)            |
| C(5)  | 20(1)           | 28(1)           | 18(1)           | 0(1)            | 6(1)            | -2(1)           |
| C(6)  | 22(1)           | 27(1)           | 15(1)           | 0(1)            | 2(1)            | -1(1)           |
| C(7)  | 14(1)           | 31(1)           | 17(1)           | -2(1)           | 2(1)            | -1(1)           |
| C(8)  | 14(1)           | 43(2)           | 21(1)           | -4(1)           | 4(1)            | -4(1)           |
| C(9)  | 21(1)           | 35(1)           | 22(1)           | -4(1)           | 2(1)            | 2(1)            |
| C(10) | 10(1)           | 31(1)           | 20(1)           | -1(1)           | 4(1)            | -2(1)           |
| C(11) | 20(1)           | 28(1)           | 21(1)           | 0(1)            | 2(1)            | -1(1)           |
| C(12) | 22(1)           | 31(1)           | 18(1)           | 3(1)            | 2(1)            | -3(1)           |
| C(13) | 15(1)           | 32(1)           | 20(1)           | -1(1)           | 4(1)            | -1(1)           |
| C(14) | 33(2)           | 32(2)           | 24(1)           | 2(1)            | 6(1)            | 9(1)            |
| C(15) | 32(1)           | 39(2)           | 16(1)           | 4(1)            | 2(1)            | 8(1)            |
| C(21) | 22(1)           | 33(1)           | 21(1)           | -2(1)           | 8(1)            | -2(1)           |
| C(22) | 23(1)           | 27(1)           | 24(1)           | -2(1)           | 3(1)            | -2(1)           |
| C(23) | 23(1)           | 35(1)           | 18(1)           | -2(1)           | 2(1)            | -4(1)           |
| C(24) | 16(1)           | 35(1)           | 20(1)           | -4(1)           | 5(1)            | -4(1)           |
| C(25) | 28(1)           | 37(2)           | 25(1)           | -1(1)           | 6(1)            | 5(1)            |
| C(26) | 34(2)           | 39(2)           | 21(1)           | 4(1)            | 8(1)            | 5(1)            |
| C(27) | 18(1)           | 38(2)           | 21(1)           | -5(1)           | 4(1)            | -3(1)           |
| C(28) | 18(1)           | 42(2)           | 29(1)           | -9(1)           | 2(1)            | -1(1)           |
| C(29) | 27(1)           | 51(2)           | 21(1)           | -4(1)           | 9(1)            | 1(1)            |

|        |       |       |       |        |       |        |
|--------|-------|-------|-------|--------|-------|--------|
| C(30)  | 16(1) | 45(2) | 23(1) | -5(1)  | 8(1)  | -3(1)  |
| C(31)  | 24(2) | 48(2) | 68(2) | -6(2)  | 4(1)  | -4(1)  |
| C(32)  | 25(2) | 48(2) | 75(2) | -4(2)  | 3(2)  | -8(1)  |
| C(33)  | 19(1) | 51(2) | 36(2) | 2(1)   | 6(1)  | -9(1)  |
| C(34)  | 25(1) | 42(2) | 26(1) | 3(1)   | 6(1)  | -2(1)  |
| C(35)  | 22(1) | 41(2) | 27(1) | 1(1)   | 3(1)  | -7(1)  |
| C(41)  | 18(1) | 40(2) | 22(1) | -2(1)  | 6(1)  | -6(1)  |
| C(42)  | 24(1) | 33(1) | 30(1) | -2(1)  | 12(1) | -7(1)  |
| C(43)  | 26(1) | 29(1) | 22(1) | 3(1)   | 9(1)  | -1(1)  |
| C(44)  | 20(1) | 28(1) | 15(1) | -2(1)  | 5(1)  | -1(1)  |
| C(45)  | 23(1) | 38(2) | 31(1) | 10(1)  | 1(1)  | -9(1)  |
| C(46)  | 26(1) | 45(2) | 30(2) | 12(1)  | -1(1) | -4(1)  |
| C(47)  | 27(1) | 26(1) | 15(1) | -3(1)  | -2(1) | 2(1)   |
| C(48)  | 38(2) | 27(1) | 24(1) | -4(1)  | -6(1) | 4(1)   |
| C(49)  | 18(1) | 32(1) | 25(1) | -5(1)  | -1(1) | 2(1)   |
| C(50)  | 27(3) | 23(3) | 16(3) | 3(2)   | 5(3)  | -4(2)  |
| C(51)  | 13(2) | 26(3) | 20(3) | 2(2)   | 3(2)  | -2(2)  |
| C(52)  | 16(2) | 21(3) | 27(3) | 4(2)   | 4(2)  | -3(2)  |
| C(53)  | 36(4) | 25(2) | 16(1) | 1(1)   | 2(2)  | 2(2)   |
| C(54)  | 59(4) | 46(4) | 26(3) | -5(3)  | 27(3) | -26(3) |
| C(55)  | 60(4) | 35(3) | 30(3) | -13(3) | 24(3) | -32(3) |
| C(61)  | 39(5) | 22(3) | 17(3) | -1(2)  | 2(3)  | -6(3)  |
| C(62)  | 27(4) | 32(2) | 19(4) | 2(2)   | 7(3)  | -2(2)  |
| C(63)  | 25(4) | 24(3) | 16(4) | 0(3)   | -3(3) | -4(3)  |
| C(64)  | 20(4) | 25(3) | 14(3) | 2(3)   | -1(3) | 3(3)   |
| C(65)  | 29(4) | 24(3) | 16(4) | 7(3)   | 4(3)  | 0(3)   |
| C(66)  | 43(3) | 22(3) | 20(4) | 7(3)   | 8(3)  | -6(3)  |
| C(50A) | 34(5) | 20(5) | 16(5) | -2(4)  | -2(4) | 2(4)   |
| C(51A) | 22(4) | 44(6) | 51(6) | -23(5) | -7(4) | 15(4)  |
| C(52A) | 31(4) | 46(6) | 43(6) | -25(5) | -8(4) | 10(4)  |
| C(53A) | 36(4) | 25(2) | 16(1) | 1(1)   | 2(2)  | 2(2)   |
| C(54A) | 47(5) | 31(4) | 32(5) | 1(3)   | 22(4) | -2(4)  |
| C(55A) | 39(5) | 40(5) | 32(5) | -5(4)  | 16(4) | -4(4)  |
| C(61A) | 34(5) | 29(5) | 15(4) | 5(3)   | 8(4)  | 11(4)  |
| C(62A) | 27(4) | 32(2) | 19(4) | 2(2)   | 7(3)  | -2(2)  |
| C(63A) | 19(5) | 27(4) | 23(6) | 2(4)   | 1(5)  | 4(4)   |
| C(64A) | 21(5) | 23(5) | 15(5) | 1(5)   | -1(4) | 4(4)   |
| C(65A) | 29(5) | 26(5) | 19(6) | 1(5)   | 5(5)  | 4(4)   |
| C(66A) | 41(5) | 23(6) | 22(6) | -3(5)  | 5(4)  | 3(4)   |

|        |         |         |         |        |         |         |
|--------|---------|---------|---------|--------|---------|---------|
| C(67)  | 17(1)   | 27(1)   | 16(1)   | 0(1)   | -1(1)   | 2(1)    |
| C(68)  | 21(1)   | 36(2)   | 16(1)   | -1(1)  | -1(1)   | 6(1)    |
| C(69)  | 21(1)   | 28(1)   | 26(1)   | -7(1)  | 2(1)    | -2(1)   |
| C(70)  | 19(1)   | 21(1)   | 17(1)   | -1(1)  | 0(1)    | 2(1)    |
| C(71)  | 23(1)   | 28(1)   | 15(1)   | 1(1)   | 0(1)    | -1(1)   |
| C(72)  | 22(1)   | 31(1)   | 19(1)   | 3(1)   | 4(1)    | -2(1)   |
| C(73)  | 19(1)   | 28(1)   | 18(1)   | -2(1)  | -1(1)   | 1(1)    |
| C(74)  | 21(1)   | 30(1)   | 16(1)   | 4(1)   | -1(1)   | 4(1)    |
| C(75)  | 19(1)   | 29(1)   | 19(1)   | 3(1)   | 4(1)    | -1(1)   |
| Cl(1S) | 65(1)   | 130(1)  | 157(2)  | 85(1)  | 52(1)   | 32(1)   |
| Cl(2S) | 137(2)  | 111(1)  | 75(1)   | 35(1)  | 3(1)    | -63(1)  |
| C(1S)  | 45(2)   | 116(4)  | 63(3)   | 35(3)  | 9(2)    | -14(2)  |
| Cl(1T) | 158(17) | 219(19) | 136(11) | 6(13)  | -17(12) | -1(16)  |
| Cl(2T) | 43(6)   | 94(7)   | 101(9)  | 64(6)  | 29(6)   | 14(6)   |
| C(1T)  | 45(2)   | 116(4)  | 63(3)   | 35(3)  | 9(2)    | -14(2)  |
| Cl(3S) | 101(2)  | 95(2)   | 105(2)  | 14(2)  | 83(2)   | -1(2)   |
| Cl(4S) | 35(1)   | 43(1)   | 26(1)   | -4(1)  | 4(1)    | -9(1)   |
| C(2S)  | 42(3)   | 42(3)   | 40(3)   | -8(3)  | 17(2)   | -17(2)  |
| Cl(3T) | 155(6)  | 76(4)   | 140(7)  | 61(5)  | 41(6)   | 15(4)   |
| Cl(4T) | 176(9)  | 156(9)  | 189(12) | -12(7) | 21(7)   | -10(7)  |
| C(2T)  | 129(10) | 87(11)  | 110(11) | 0(10)  | 25(9)   | -22(10) |

Hydrogen coordinates ( $\times 10^4$ ) and isotropic displacement parameters ( $\text{\AA}^2 \times 10^{-3}$ )  
for Tetraazo macrocycle **3**.

|       | x     | y    | z    | U(eq) |
|-------|-------|------|------|-------|
| H(2)  | 6679  | 2607 | 1342 | 35    |
| H(3)  | 8037  | 2608 | 1948 | 35    |
| H(5)  | 8683  | 3399 | 21   | 26    |
| H(6)  | 7320  | 3413 | -585 | 26    |
| H(8A) | 9999  | 3162 | 576  | 39    |
| H(8B) | 10507 | 3443 | 1374 | 39    |
| H(8C) | 9752  | 3854 | 912  | 39    |
| H(9A) | 9706  | 2121 | 1148 | 39    |
| H(9B) | 9334  | 2092 | 1932 | 39    |
| H(9C) | 10250 | 2344 | 1956 | 39    |
| H(11) | 9773  | 2728 | 3065 | 28    |

S130

|        |      |      |       |    |
|--------|------|------|-------|----|
| H(12)  | 9636 | 3341 | 4161  | 28 |
| H(14)  | 8809 | 4894 | 2791  | 36 |
| H(15)  | 8911 | 4271 | 1703  | 35 |
| H(22)  | 9198 | 4779 | 5729  | 30 |
| H(23)  | 8701 | 5311 | 6730  | 30 |
| H(25)  | 7692 | 6721 | 5229  | 36 |
| H(26)  | 8206 | 6206 | 4234  | 37 |
| H(28A) | 8143 | 7325 | 6429  | 45 |
| H(28B) | 8749 | 6976 | 7127  | 45 |
| H(28C) | 7919 | 7306 | 7284  | 45 |
| H(29A) | 7572 | 5563 | 7355  | 49 |
| H(29B) | 7557 | 6229 | 7846  | 49 |
| H(29C) | 8406 | 5943 | 7681  | 49 |
| H(31)  | 6579 | 5512 | 6258  | 56 |
| H(32)  | 5195 | 5607 | 5739  | 60 |
| H(34)  | 5377 | 7597 | 5843  | 37 |
| H(35)  | 6764 | 7495 | 6374  | 36 |
| H(42)  | 3181 | 7982 | 4258  | 34 |
| H(43)  | 1836 | 7943 | 3598  | 30 |
| H(45)  | 1514 | 6203 | 4631  | 37 |
| H(46)  | 2859 | 6229 | 5277  | 41 |
| H(48A) | 747  | 7754 | 2740  | 47 |
| H(48B) | 350  | 7948 | 3480  | 47 |
| H(48C) | -168 | 7533 | 2782  | 47 |
| H(49A) | -458 | 6655 | 3634  | 39 |
| H(49B) | 20   | 7040 | 4379  | 39 |
| H(49C) | 252  | 6290 | 4221  | 39 |
| H(51)  | -119 | 5783 | 2999  | 24 |
| H(52)  | 58   | 5073 | 1998  | 26 |
| H(54)  | 1832 | 6254 | 1467  | 49 |
| H(55)  | 1682 | 6939 | 2490  | 48 |
| H(62)  | 886  | 4164 | 159   | 31 |
| H(63)  | 1216 | 3443 | -784  | 27 |
| H(65)  | 2783 | 4801 | -1366 | 28 |
| H(66)  | 2481 | 5506 | -408  | 34 |
| H(51A) | -244 | 6091 | 2645  | 48 |
| H(52A) | -87  | 5374 | 1647  | 50 |
| H(54A) | 2253 | 5976 | 1831  | 42 |
| H(55A) | 2112 | 6636 | 2891  | 43 |

|        |      |      |       |     |
|--------|------|------|-------|-----|
| H(62A) | 683  | 4159 | -21   | 31  |
| H(63A) | 1039 | 3491 | -1000 | 28  |
| H(65A) | 2937 | 4705 | -1150 | 29  |
| H(66A) | 2569 | 5370 | -183  | 35  |
| H(68A) | 2381 | 3583 | -2930 | 37  |
| H(68B) | 2399 | 4307 | -2556 | 37  |
| H(68C) | 1563 | 3898 | -2723 | 37  |
| H(69A) | 1364 | 2920 | -1942 | 37  |
| H(69B) | 2062 | 2677 | -1248 | 37  |
| H(69C) | 2181 | 2592 | -2132 | 37  |
| H(71)  | 3686 | 3914 | -2380 | 27  |
| H(72)  | 5077 | 3850 | -1868 | 29  |
| H(74)  | 4548 | 2980 | 77    | 28  |
| H(75)  | 3169 | 3048 | -438  | 26  |
| H(1SA) | 5925 | 4042 | 3366  | 90  |
| H(1SB) | 5685 | 4570 | 2682  | 90  |
| H(1TA) | 7283 | 3747 | 3089  | 90  |
| H(1TB) | 6408 | 3670 | 3349  | 90  |
| H(2SA) | 5774 | 4778 | 9336  | 48  |
| H(2SB) | 6044 | 5496 | 9678  | 48  |
| H(2TA) | 5863 | 4818 | 9454  | 130 |
| H(2TB) | 5993 | 5529 | 9863  | 130 |

## References

- [1] a) R. Salvio, L. Mandolini, C. Savelli, *J. Org. Chem.* **2013**, *78*, 7259; b) Y. Yano, JP 2012140345, **2012**.
- [2] C. Zhang, N. Jiao, *Angew. Chem. Int. Ed.* **2010**, *49*, 6174.
- [3] A. Heindl, L. Schweighauser, C. Logemann, H. Wegner, *Synthesis* **2017**, *49*, 2632.
- [4] B. Priewisch, K. Rück-Braun, *J. Org. Chem.* **2005**, *70*, 2350.
- [5] S. Bellotto, R. Reuter, C. Heinis, H. A. Wegner, *J. Org. Chem.* **2011**, *76*, 9826.
- [6] R. Reuter, H. A. Wegner, *Chem. Eur. J.* **2011**, *17*, 2987.
- [7] a) J. P. Perdew, K. Burke, M. Ernzerhof, *Phys. Rev. Lett.* **1996**, *77*, 3865; b) C. Adamo, V. Barone, *J. Chem. Phys.* **1999**, *110*, 6158.
- [8] a) S. Grimme, J. Antony, S. Ehrlich, H. Krieg, *J. Chem. Phys.* **2010**, *132*, 154104; b) S. Grimme, S. Ehrlich, L. Goerigk, *J. Comput. Chem.* **2011**, *32*, 1456.
- [9] F. Weigend, R. Ahlrichs, *Phys. Chem. Chem. Phys.* **2005**, *7*, 3297.
- [10] A. V. Marenich, C. J. Cramer, D. G. Truhlar, *J. Phys. Chem. B* **2009**, *113*, 6378.
- [11] M. J. Frisch, G. W. Trucks, H. B. Schlegel, G. E. Scuseria, M. A. Robb, J. R. Cheeseman, G. Scalmani, V. Barone, G. A. Petersson, H. Nakatsuji et al., *Gaussian 16 Rev. A.03*, Wallingford, CT, **2016**.
- [12] C. Y. Legault, *CYLview*, Université de Sherbrooke, **2009**.
- [13] a) S. E. Wheeler, K. N. Houk, P. v. R. Schleyer, W. D. Allen, *J. Am. Chem. Soc.* **2009**, *131*, 2547; b) M. Hammerich, C. Schütt, C. Stähler, P. Lenters, F. Röhricht, R. Höppner, R. Herges, *J. Am. Chem. Soc.* **2016**, *138*, 13111.
- [14] L. Krause, R. Herbst-Irmer, G. M. Sheldrick, D. Stalke, *J. Appl. Cryst.* **2015**, *48*, 3.
- [15] G. M. Sheldrick, *Acta Cryst. A* **2015**, *71*, 3.
- [16] A. Thorn, B. Dittrich, G. M. Sheldrick, *Acta Cryst. A* **2012**, *68*, 448.
- [17] P. Müller, *Cryst. Rev.* **2009**, *15*, 57.
- [18] A. L. Spek, *Acta Cryst. C* **2015**, *71*, 9.
- [19] A. L. Spek, *Acta Cryst. D* **2009**, *65*, 148.
